# Supplementary material for: Synthesis and Optical Properties of a Series of Push-Pull Dyes Based on Pyrene as the Electron Donor
Source: MDPI journal article supplement (doi:10.3390/molecules28031489), 2023-02-03

|                                                                     |    |
|---------------------------------------------------------------------|----|
| Synthesis of the different dyes                                     | 2  |
| UV-visible absorption spectra in solvents of different polarities   | 21 |
| Variation of the absorption maxima vs. the Kamlet–Taft parameters   | 29 |
| Variation of the absorption maxima vs. the Catalan (SPP/SdP) scales | 36 |
| Summary of the optical properties in 23 solvents                    | 48 |
| Contour plots of the HOMO and LUMO energy levels of dyes            | 53 |
| Main transitions observed for dyes Dye 1-Dye 15                     | 61 |
| TGA measurements                                                    | 66 |

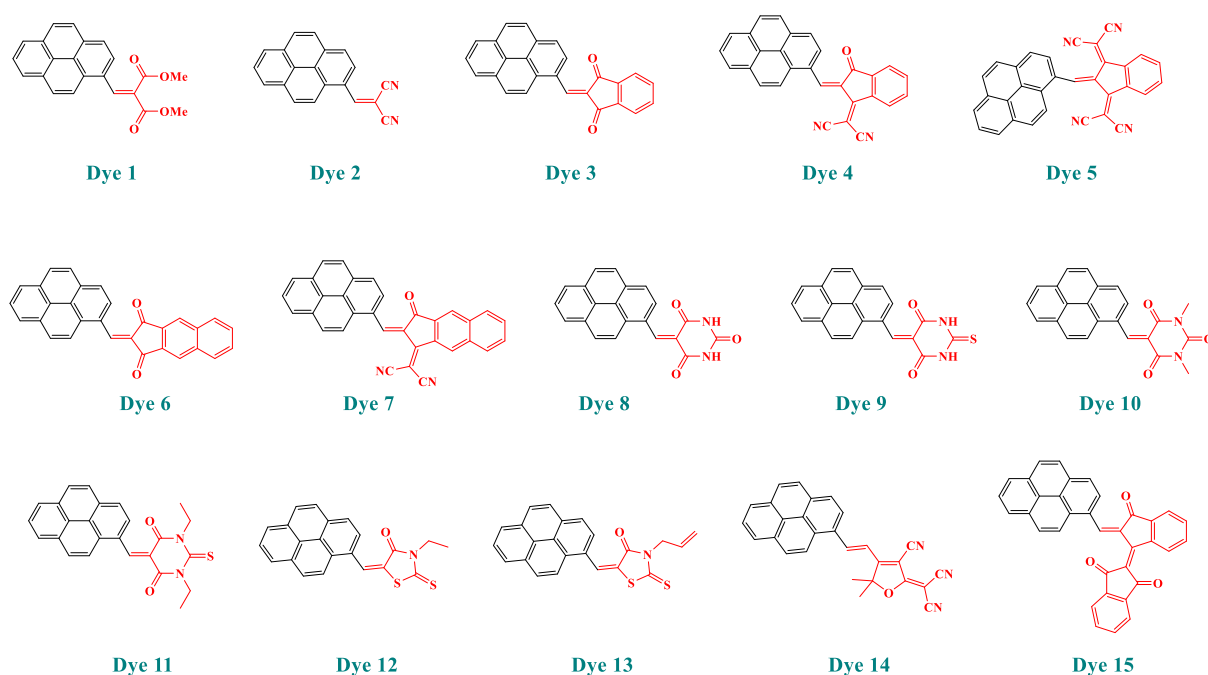

**Figure S1.** chemical structures of the dyes examined in this work.

## Experimental part

All reagents and solvents were purchased from Aldrich, Alfa Aesar or TCI Europe and used as received without further purification. Mass spectroscopy was performed by the Spectropole of Aix-Marseille University. ESI mass spectral analyses were recorded with a 3200 QTRAP (Applied Biosystems SCIEX) mass spectrometer. The HRMS mass spectral analysis was performed with a QStar Elite (Applied Biosystems SCIEX) mass spectrometer. Elemental analyses were recorded with a Thermo Finnigan EA 1112 elemental analysis apparatus driven by the Eager 300 software.  $^1\text{H}$  and  $^{13}\text{C}$  NMR spectra were determined at room temperature in 5 mm o.d. tubes on a Bruker Avance 400 spectrometer and on a Bruker Avance 300 spectrometer of the Spectropole: The  $^1\text{H}$  chemical shifts were referenced to the solvent peak  $\text{CDCl}_3$  (7.26 ppm) and the  $^{13}\text{C}$  chemical shifts were referenced to the solvent peak  $\text{CDCl}_3$  (77 ppm).

## Synthesis of dimethyl 2-(pyren-1-ylmethylene)malonate **Dye 1**

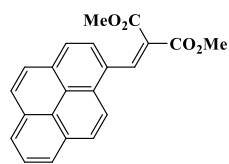

Chemical Formula: C<sub>22</sub>H<sub>16</sub>O<sub>4</sub>  
Molecular Weight: 344.3660

1-Pyrenecarbaldehyde (2 g, 8.68 mmol, M = 230.26 g/mol), dimethyl malonate (1.14 g, 8.68 mmol, M = 132.11 g/mol) were dissolved in absolute ethanol (50 mL). A few drops of piperidine were added. Immediately, the solution turned orange. The solution was refluxed for 4 hours. The solution was concentrated under reduced pressure. Addition of pentane precipitated a light-yellow solid which was filtered off and dried under vacuum (2.54 g, 85% yield). <sup>1</sup>H NMR (300 MHz, CDCl<sub>3</sub>) δ 8.81 (s, 1H), 8.30 – 7.92 (m, 9H), 3.97 (s, 3H), 3.72 (s, 3H); <sup>13</sup>C NMR (75 MHz, CDCl<sub>3</sub>) δ 167.05, 164.57, 142.05, 132.75, 131.14, 130.63, 129.81, 128.79, 128.71, 127.75, 127.20, 127.18, 126.33, 126.14, 126.05, 125.53, 124.68, 124.59, 124.36, 122.89, 52.79, 52.56; HRMS (ESI MS) m/z: theor: 344.1049 found: 344.1042 ([M]<sup>+</sup> detected).

**Figure S2.** <sup>1</sup>H NMR spectrum of **Dye 1**

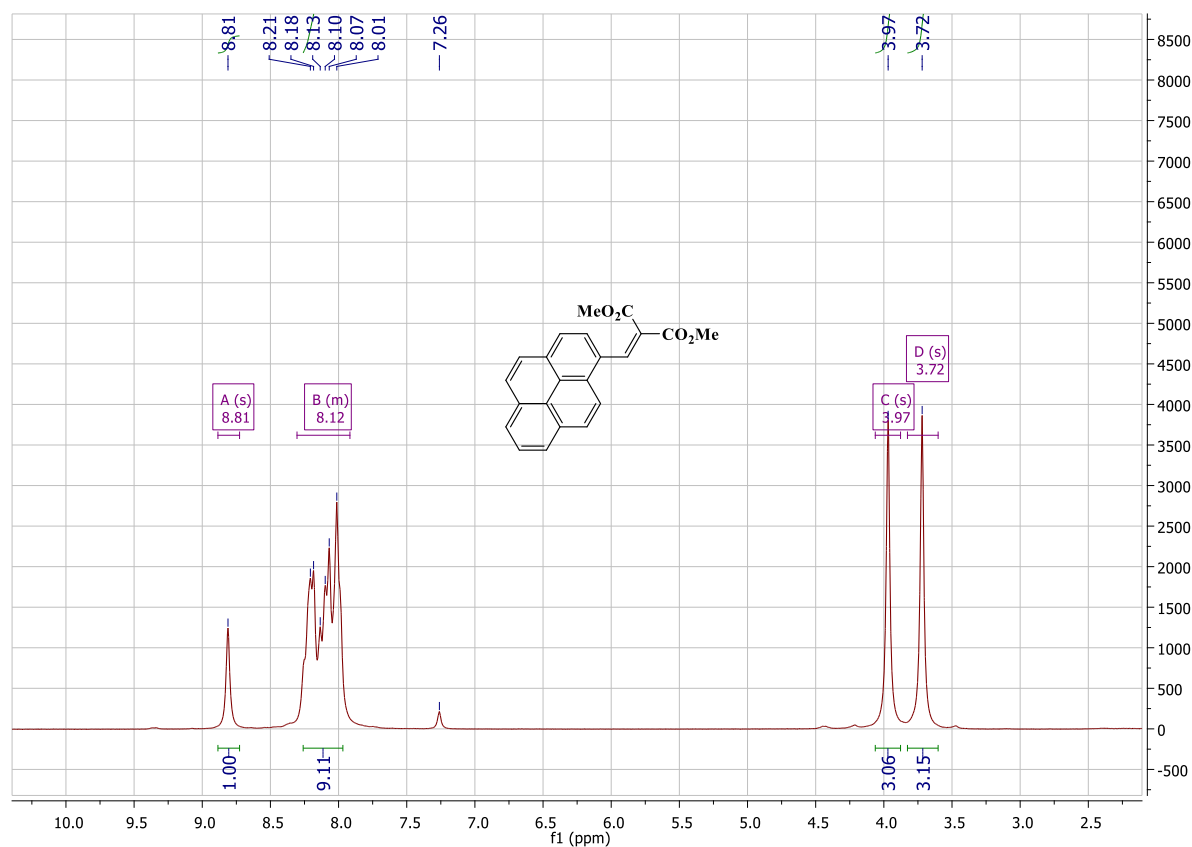

**Figure S3.**  $^{13}\text{C}$  NMR spectrum of **Dye 1**

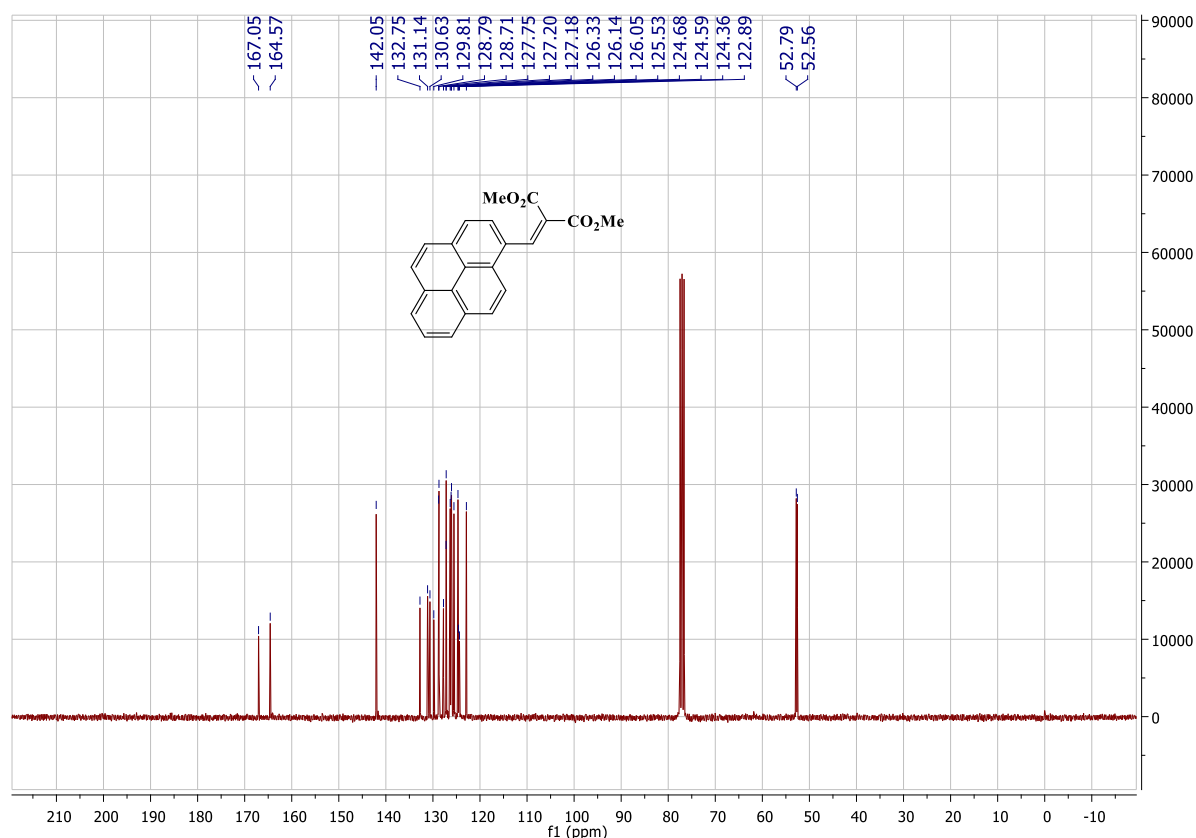

**Synthesis of 2-(pyren-1-ylmethylene)malononitrile **Dye 2****

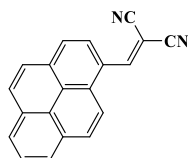

Chemical Formula:  $\text{C}_{20}\text{H}_{10}\text{N}_2$   
Molecular Weight: 278.3140

1-Pyrenecarbaldehyde (2 g, 8.68 mmol,  $M = 230.26$  g/mol), malononitrile (0.57 g, 8.68 mmol,  $M = 66.06$  g/mol) were dissolved in absolute ethanol (50 mL). A few drops of piperidine were added. Immediately, the solution turned orange. The solution was refluxed for 4 hours. After cooling, the precipitate was filtered off, washed several times with ether and dried under vacuum (1.88 g, 78% yield).  $^1\text{H}$  NMR (300 MHz, DMSO)  $\delta$  9.62 (s, 1H), 8.71 (t,  $J = 9.2$  Hz, 2H), 8.54 – 8.37 (m, 5H), 8.37 – 8.18 (m, 2H); HRMS (ESI MS)  $m/z$ : theor: 278.0844 found: 278.0844 ( $[\text{M}]^+$  detected); Anal. Calc. for  $\text{C}_{20}\text{H}_{10}\text{N}_2$ : C, 86.3; H, 3.6; N, 9.7; Found: C, 86.4; H, 3.7; N, 9.7 %

**Figure S4.**  $^1\text{H}$  NMR spectrum of **Dye 2**

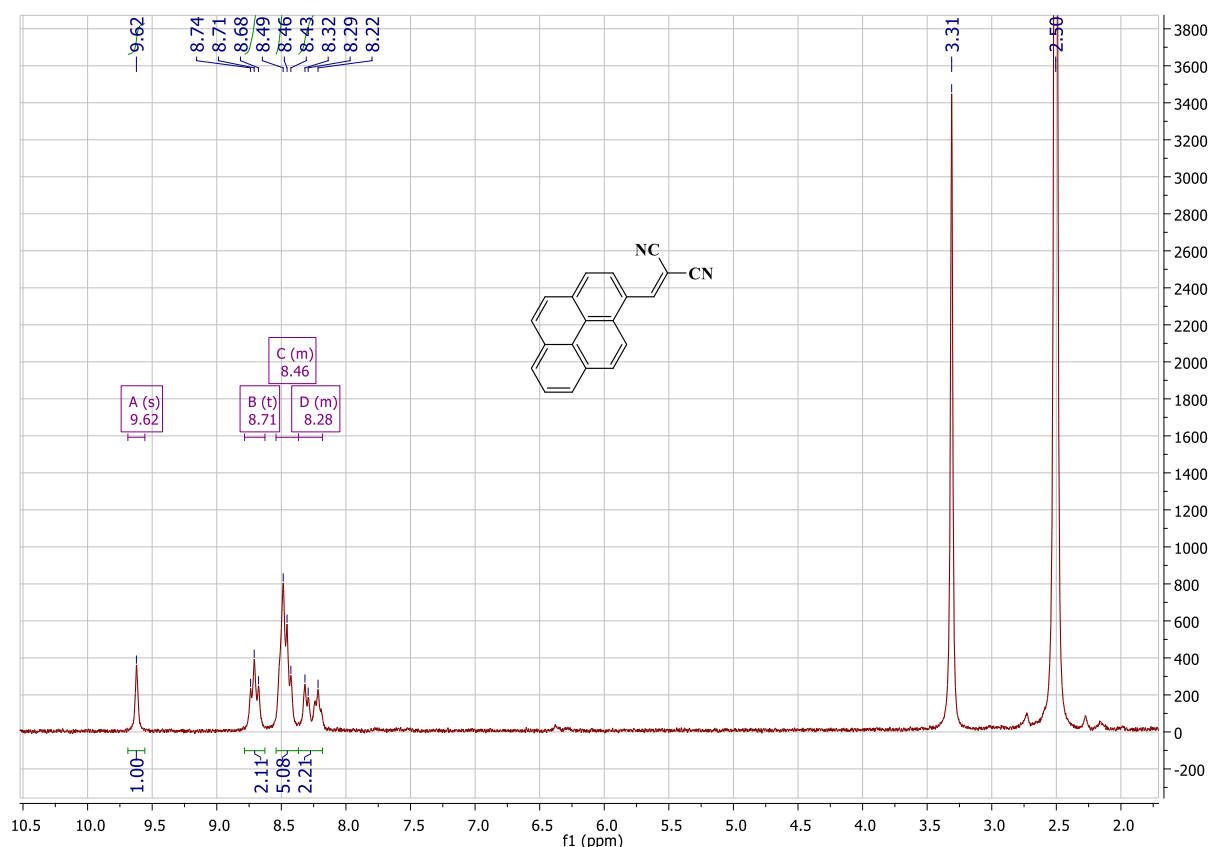

**Synthesis of 2-(pyren-1-ylmethylene)-1*H*-indene-1,3(2*H*)-dione **Dye 3****

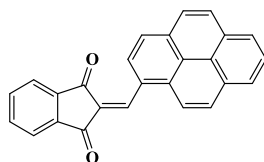

Chemical Formula:  $\text{C}_{26}\text{H}_{14}\text{O}_2$   
Molecular Weight: 358.3960

Pyrene 1-carbaldehyde (1.57 g, 6.84 mmol,  $M = 230.26$  g/mol) and indane-1,3-dione (1 g, 6.84 mmol,  $M = 146.14$  g/mol) were suspended in 20 mL absolute ethanol and a few drops of piperidine were added. Immediately, the solution turned deep red. The solution was refluxed for 3 hours. During that time, an extremely insoluble precipitate formed. After cooling, the precipitate was filtered off, washed several times with ethanol and ether, and dried under vacuum (2.01 g, 82% yield).  $^1\text{H}$  NMR (400 MHz,  $\text{CDCl}_3$ )  $\delta$  9.34 (d,  $J = 8.2$  Hz, 1H), 9.11 (s, 1H), 8.63 (d,  $J = 9.3$  Hz, 1H), 8.31 – 8.28 (m, 2H), 8.28 – 8.23 (m, 2H), 8.21 (d,  $J = 8.9$  Hz, 1H), 8.12 (d,  $J = 8.9$  Hz, 1H), 8.10 – 8.03 (m, 3H), 7.87 – 7.81 (m, 2H); HRMS (ESI MS)  $m/z$ : theor: 358.0994 found: 358.0996 ( $[\text{M}]^+$  detected); Anal. Calc. for  $\text{C}_{26}\text{H}_{14}\text{O}_2$ : C, 87.1; H, 3.9; O, 8.9; Found: C, 87.4; H, 3.7; N, 8.7 %

**Figure S5.**  $^1\text{H}$  NMR spectrum of **Dye 3**

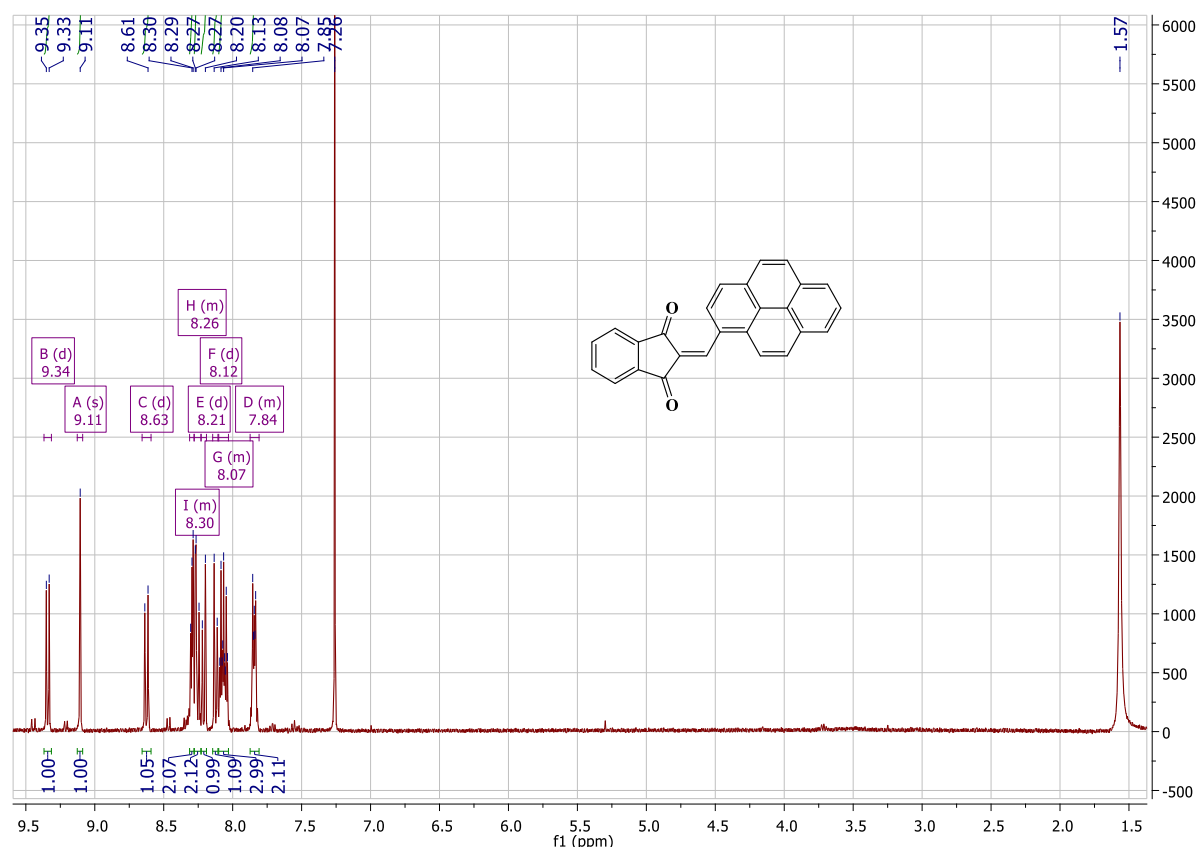

Synthesis of 2-(3-oxo-2-(pyren-1-ylmethylene)-2,3-dihydro-1*H*-inden-1-ylidene)malononitrile  
**Dye 4**

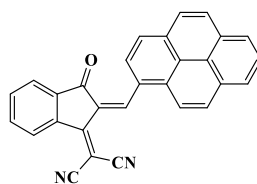

Chemical Formula:  $\text{C}_{29}\text{H}_{14}\text{N}_2\text{O}$   
Molecular Weight: 406.4440

1-Pyrenecarboxaldehyde (1.18 g, 5.15 mmol,  $M = 230.27$  g/mol) and 2-(3-oxo-2,3-dihydro-1*H*-inden-1-ylidene)malononitrile (1 g, 5.15 mmol,  $M = 194.19$  g/mol) were suspended in 20 mL absolute ethanol and a few drops of piperidine were added. Immediately, the solution turned deep red. The flask was introduced in an oil bath preheated at  $90^\circ\text{C}$ . After 15 min, the reaction was ended (TLC control). During that time, an extremely insoluble precipitate formed. After cooling, the precipitate was filtered off, washed several times with ethanol and ether. Due to its high insolubility, no  $^1\text{H}$  NMR spectrum could be acquired (1.51 g, 72% yield). HRMS (ESI MS)  $m/z$ : theor: 406.1106 found: 406.1103 ( $[\text{M}]^+$  detected); Anal. Calc. for  $\text{C}_{29}\text{H}_{14}\text{N}_2\text{O}$ : C, 85.7; H, 3.5; O, 3.9; Found: C, 85.4; H, 3.7; N, 3.7 %

## Synthesis of 2,2'-(2-(pyren-1-ylmethylene)-1*H*-indene-1,3(2*H*)-diylidene)dimalononitrile **Dye 5**

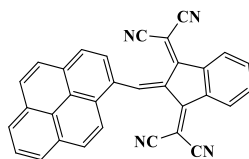

Chemical Formula: C<sub>32</sub>H<sub>14</sub>N<sub>4</sub>  
Molecular Weight: 454.4920

2,2'-(1*H*-Indene-1,3(2*H*)-diylidene)dimalononitrile (1.22 g, 5.02 mmol, *M* = 242.24 g/mol) and pyrene-1-carbaldehyde (1.15 g, 5.02 mmol, *M* = 230.27 g/mol) were dissolved in acetic anhydride (20 mL) and the solution was refluxed for two hours. After cooling, the solvent was removed under reduced pressure. Addition of ether followed by pentane precipitated a blue solid that was filtered off, washed several times with pentane and dried under vacuum (1.96 g, 86% yield). <sup>1</sup>H NMR (400 MHz, CDCl<sub>3</sub>) δ 9.56 (s, 1H), 8.74 (dd, *J* = 5.9, 3.0 Hz, 1H), 8.65 (dd, *J* = 5.9, 2.9 Hz, 1H), 8.37 (s, 2H), 8.33 (t, *J* = 7.9 Hz, 2H), 8.25 (d, *J* = 8.9 Hz, 1H), 8.17 (d, *J* = 8.1 Hz, 1H), 8.11 (dd, *J* = 12.7, 5.1 Hz, 2H), 7.94 (d, *J* = 8.1 Hz, 1H), 7.91 (dd, *J* = 6.6, 2.9 Hz, 2H); HRMS (ESI MS) *m/z*: theor: 454.1218 found: 454.1218 ([*M*]<sup>+</sup> detected); Anal. Calc. for C<sub>32</sub>H<sub>14</sub>N<sub>4</sub>: C, 84.6; H, 3.1; N, 12.3; Found: C, 84.4; H, 2.7; N, 12.4 %

**Figure S6.** <sup>1</sup>H NMR spectrum of **Dye 5**

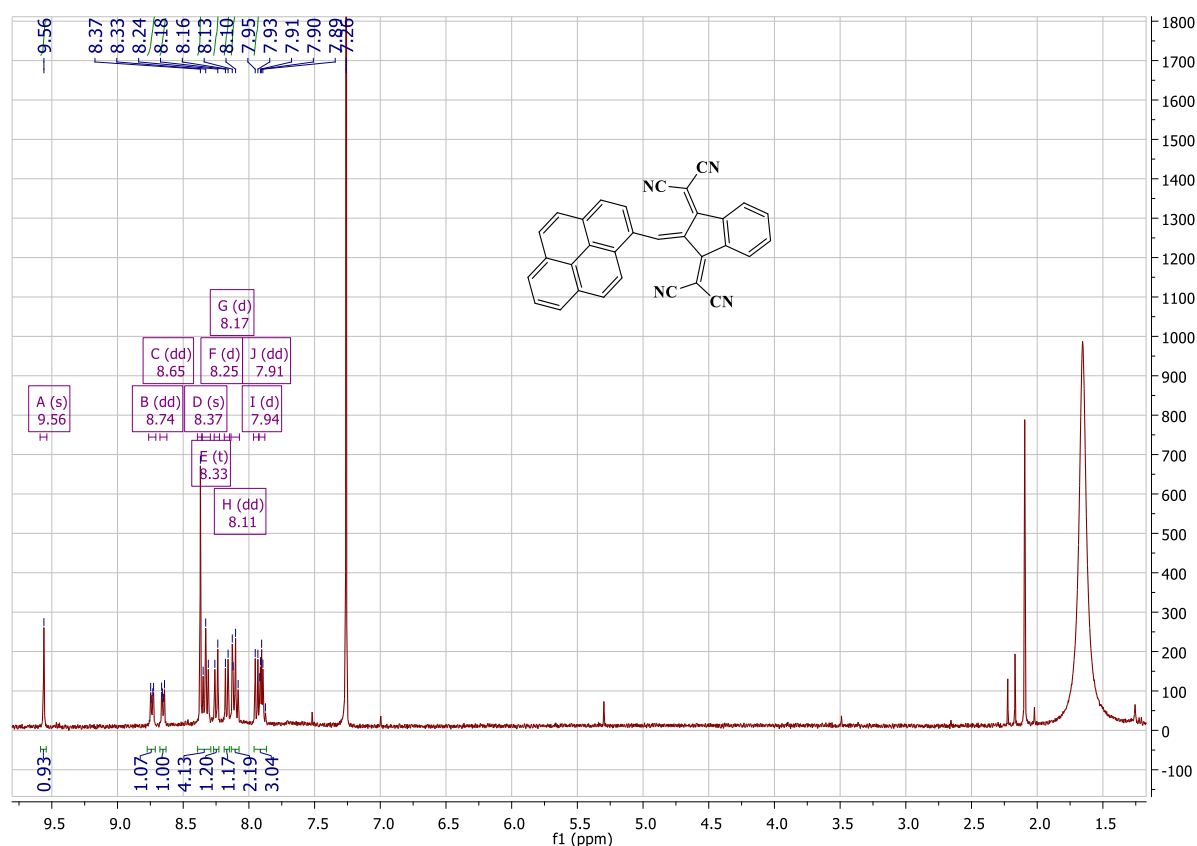

## Synthesis of 2-(pyren-1-ylmethylene)-1*H*-cyclopenta[*b*]naphthalene-1,3(2*H*)-dione **Dye 6**

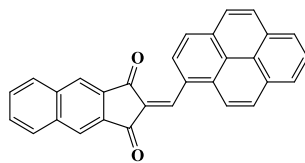

Chemical Formula: C<sub>30</sub>H<sub>16</sub>O<sub>2</sub>  
Molecular Weight: 408.4560

1-Pyrenecarboxaldehyde (1.18 g, 5.15 mmol, M = 230.27 g/mol) and 1*H*-cyclopenta[*b*]naphthalene-1,3(2*H*)-dione (1.01 g, 5.15 mmol, M = 196.20 g/mol) were suspended in 20 mL absolute ethanol and a few drops of piperidine were added. Immediately, the solution turned deep red. The flask was introduced in an oil bath preheated at 90°C. After 15 min, the reaction was ended (TLC control). During that time, an extremely insoluble precipitate formed. After cooling, the precipitate was filtered off, washed several times with ethanol and ether. Due to its insolubility, no <sup>1</sup>H NMR spectrum could be acquired (1.60 g, 76% yield). HRMS (ESI MS) m/z: theor: 408.1150 found: 408.1157 ([M]<sup>+</sup> detected); Anal. Calc. for C<sub>30</sub>H<sub>16</sub>O<sub>2</sub>: C, 88.2; H, 3.9; O, 7.8; Found: C, 88.4; H, 3.9; N, 8.1 %

## Synthesis of 2-(3-oxo-2-(pyren-1-ylmethylene)-2,3-dihydro-1*H*-cyclopenta[*b*]naphthalen-1-ylidene)malononitrile **Dye 7**

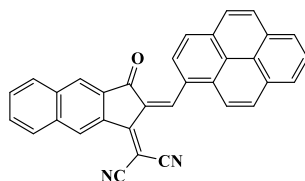

Chemical Formula: C<sub>33</sub>H<sub>16</sub>N<sub>2</sub>O  
Molecular Weight: 456.5040

1-Pyrenecarboxaldehyde (1.18 g, 5.15 mmol, M = 230.27 g/mol) and 2-(3-oxo-2,3-dihydro-1*H*-cyclopenta[*b*]naphthalen-1-ylidene)malononitrile (1.26 g, 5.15 mmol, M = 244.25 g/mol) were suspended in 20 mL absolute ethanol and a few drops of piperidine were added. Immediately, the solution turned deep red. The flask was introduced in an oil bath preheated at 90°C. After 15 min, the reaction was ended (TLC control). During that time, an extremely insoluble precipitate formed. After cooling, the precipitate was filtered off, washed several times with ethanol and ether (1.90 g, 81% yield). Due to its insolubility, no <sup>1</sup>H NMR spectrum could be acquired. HRMS (ESI MS) m/z: theor: 456.1263 found: 456.1256 ([M]<sup>+</sup> detected); Anal. Calc. for C<sub>33</sub>H<sub>16</sub>N<sub>2</sub>O: C, 86.8; H, 3.5; O, 3.5; Found: C, 86.8; H, 3.6; N, 3.6 %

## Synthesis of 5-(pyren-1-ylmethylene)pyrimidine-2,4,6(1*H*,3*H*,5*H*)-trione **Dye 8**

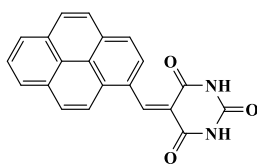

Chemical Formula: C<sub>21</sub>H<sub>12</sub>N<sub>2</sub>O<sub>3</sub>  
Molecular Weight: 340.3380



1-Pyrenecarbaldehyde (2 g, 8.68 mmol,  $M = 230.26$  g/mol), barbituric acid (1.11 g, 8.68 mmol,  $M = 128.09$  g/mol) were dissolved in absolute ethanol (100 mL). Immediately, the solution turned orange. The solution was refluxed for 4 hours. After cooling, the precipitate was filtered off, washed several times with ether and dried under vacuum (2.45 g, 83% yield).  $^1\text{H}$  NMR (400 MHz, DMSO)  $\delta$  11.50 (s, 1H), 11.21 (s, 1H), 9.11 (s, 1H), 8.42 – 8.11 (m, 9H); HRMS (ESI MS)  $m/z$ : theor: 340.0848 found: 340.0842 ( $[\text{M}]^+$  detected); Anal. Calc. for  $\text{C}_{21}\text{H}_{12}\text{N}_2\text{O}_3$ : C, 74.1; H, 3.5; O, 14.1; Found: C, 74.4; H, 3.7; N, 14.2 %

**Figure S7.**  $^1\text{H}$  NMR spectrum of **Dye 8**

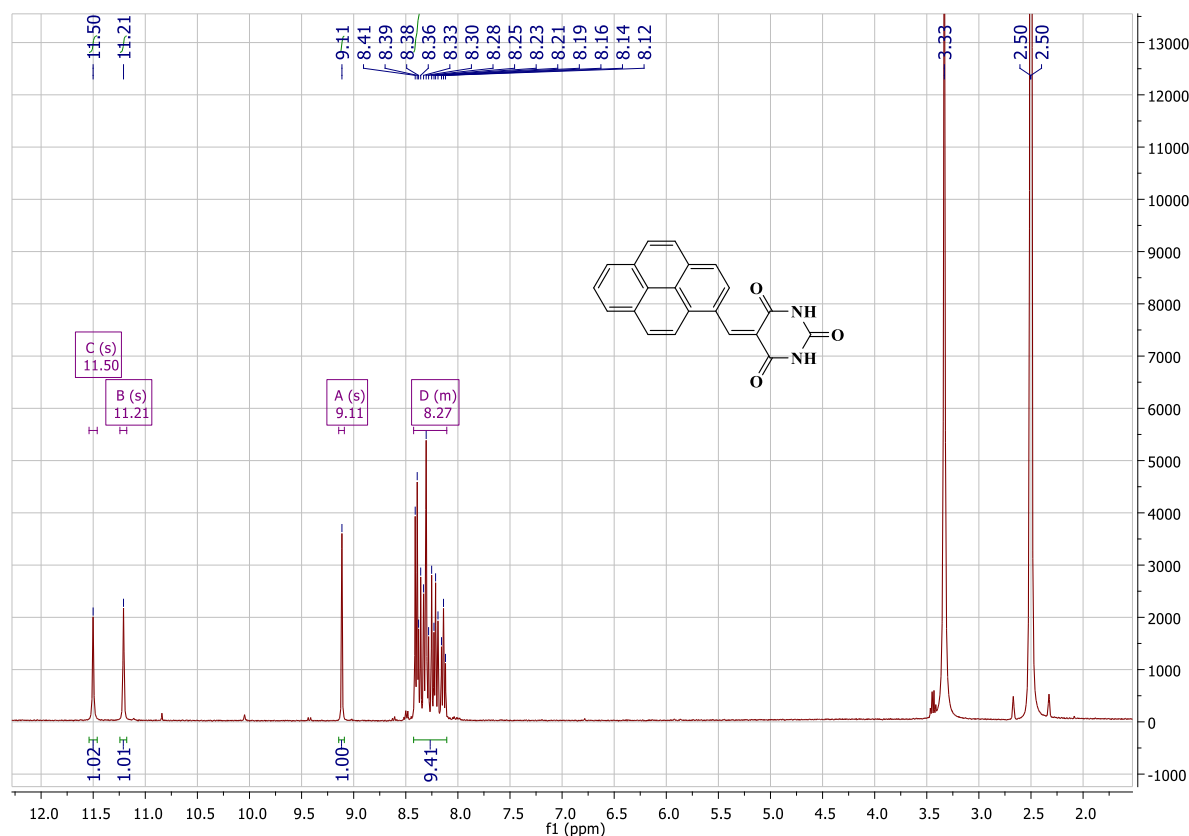

Synthesis of 5-(pyren-1-ylmethylene)-2-thioxodihydropyrimidine-4,6(1*H*,5*H*)-dione **Dye 9**

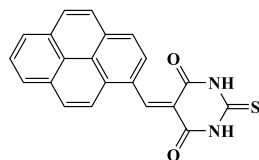

Chemical Formula:  $\text{C}_{21}\text{H}_{12}\text{N}_2\text{O}_2\text{S}$   
Molecular Weight: 356.3990

1-Pyrenecarbaldehyde (2 g, 8.68 mmol,  $M = 230.26$  g/mol), thiobarbituric acid (1.25 g, 8.68 mmol,  $M = 144.15$  g/mol) were dissolved in absolute ethanol (200 mL). Immediately, the solution turned purple. The solution was refluxed for 4 hours. After cooling, the precipitate was filtered off, washed several times with ether and dried under vacuum (2.60 g, 84% yield).  $^1\text{H}$  NMR (400 MHz, DMSO)  $\delta$  12.57 (s, 1H), 12.33 (s, 1H), 9.14 (s, 1H), 8.42 (dd,  $J = 12.8, 7.9$  Hz, 3H), 8.31 (dd,  $J = 15.2, 8.6$  Hz, 3H), 8.23 (dd,  $J = 9.0, 3.4$  Hz, 2H), 8.14 (t,  $J = 7.6$  Hz, 1H);

HRMS (ESI MS)  $m/z$ : theor: 356.0619 found: 356.0619 ( $[M]^+$  detected); Anal. Calc. for  $C_{21}H_{12}N_2O_2S$ : C, 70.8; H, 3.4; O, 9.0; Found: C, 70.6; H, 3.3; N, 9.2 %

**Figure S8.**  $^1H$  NMR spectrum of **Dye 9**

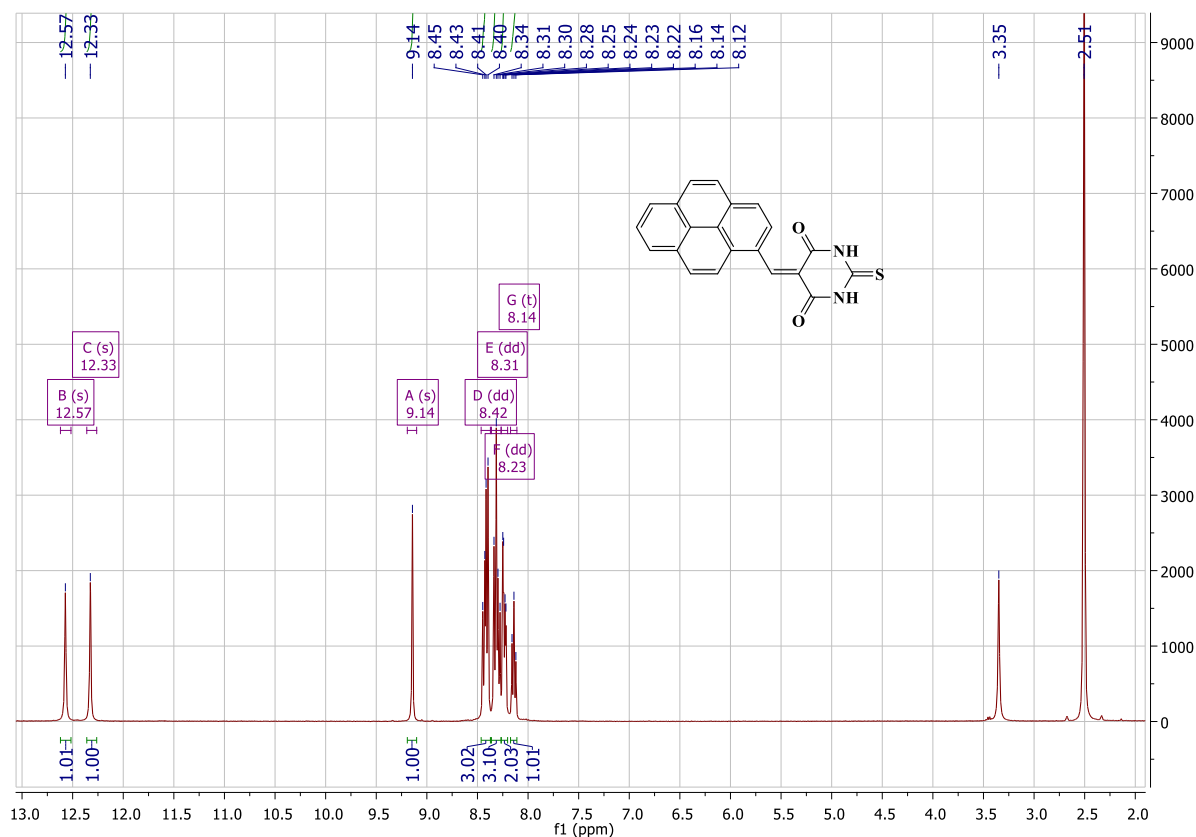

Synthesis of 1,3-dimethyl-5-(pyren-1-ylmethylene)pyrimidine-2,4,6(1*H*,3*H*,5*H*)-trione **Dye 10**

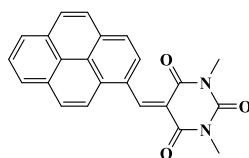

Chemical Formula:  $C_{23}H_{16}N_2O_3$   
Molecular Weight: 368.3920

Pyrene-1-carbaldehyde (1 g, 4.34 mmol,  $M = 230.27$  g/mol) and 1,3-dimethylpyrimidine-2,4,6(1*H*,3*H*,5*H*)-trione (0.68 g, 4.34 mmol,  $M = 156.14$  g/mol) were suspended in ethanol (50 mL) and a few drops of piperidine were added. The solution was refluxed overnight. Upon cooling, a precipitate formed. It was filtered off, washed several times with ether and pentane, and dried under vacuum (1.25 g, 78% yield).  $^1H$  NMR (400 MHz,  $CDCl_3$ )  $\delta$  9.56 (s, 1H), 8.47 (d,  $J = 8.2$  Hz, 1H), 8.26 (d,  $J = 7.6$  Hz, 2H), 8.21 – 8.14 (m, 4H), 8.11 – 8.01 (m, 2H), 3.51 (s, 3H), 3.35 (s, 3H);  $^{13}C$  NMR (101 MHz,  $CDCl_3$ )  $\delta$  162.44, 160.05, 157.60, 151.47, 134.27, 131.08, 131.04, 130.56, 129.65, 129.32, 128.75, 127.38, 127.22, 126.75, 126.66, 126.36, 124.37, 123.75, 123.34, 118.56, 29.03, 28.40; HRMS (ESI MS)  $m/z$ : theor: 368.1161 found: 368.1165 ( $[M]^+$  detected)

**Figure S9.**  $^1\text{H}$  NMR spectrum of **Dye 10**

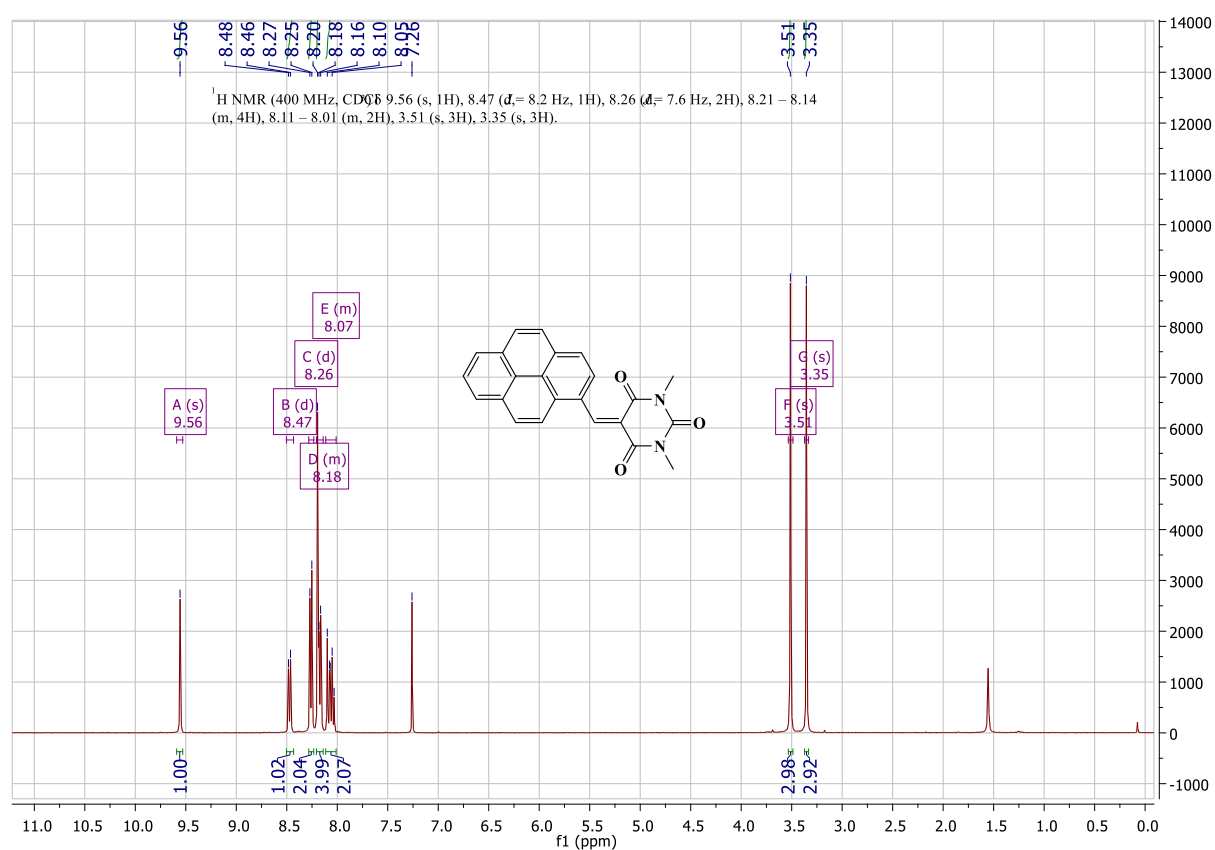

**Figure S10.**  $^{13}\text{C}$  NMR spectrum of **Dye 10**

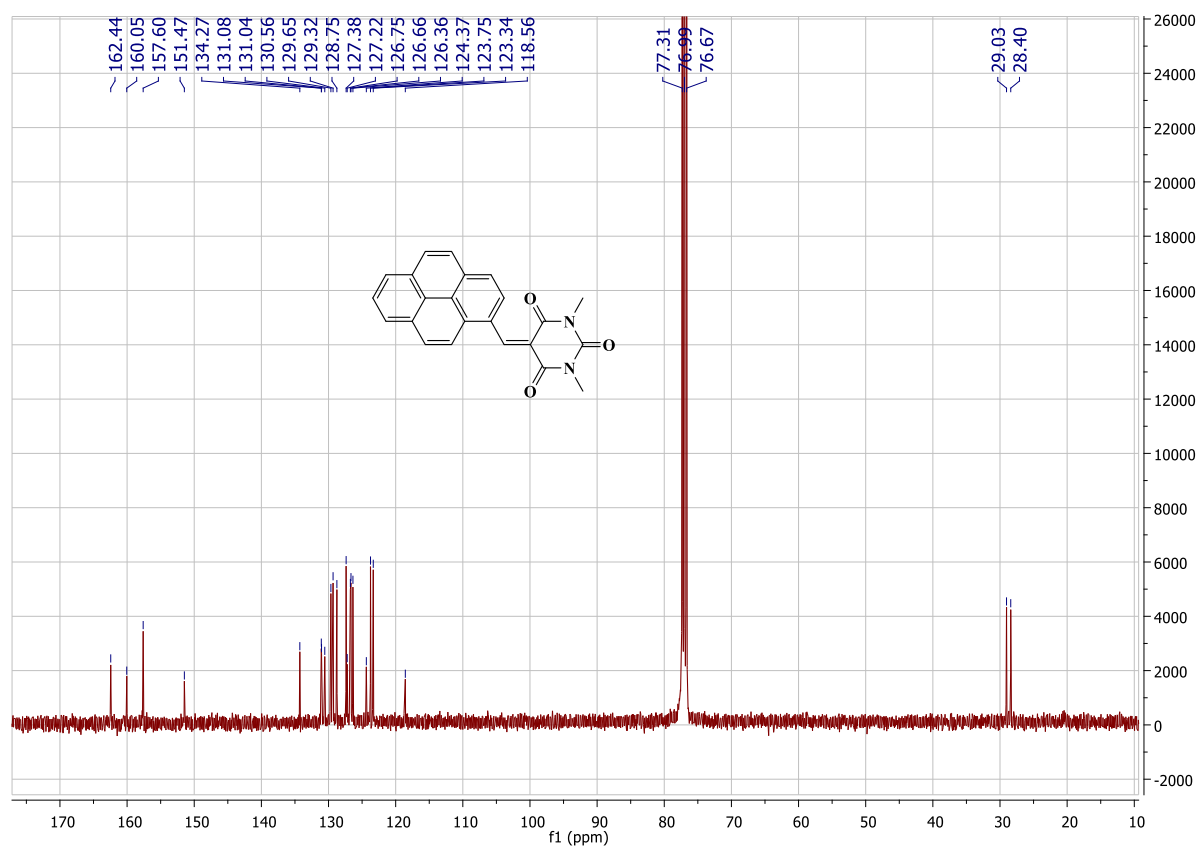

Synthesis of 1,3-diethyl-5-(pyren-1-ylmethylene)-2-thioxodihydropyrimidine-4,6(1*H*,5*H*)-dione **Dye 11**

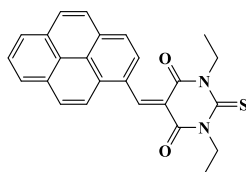

Chemical Formula: C<sub>25</sub>H<sub>20</sub>N<sub>2</sub>O<sub>2</sub>S  
Molecular Weight: 412.5070

Pyrene-1-carbaldehyde (1 g, 4.34 mmol, M = 230.27 g/mol) and 1,3-diethyl-2-thioxodihydropyrimidine-4,6(1*H*,5*H*)-dione (0.87 g, 4.34 mmol, M = 200.26 g/mol) were suspended in ethanol (50 mL) and a few drops of piperidine were added. The solution was refluxed overnight. Upon cooling, a precipitate formed. It was filtered off, washed several times with ether and pentane, and dried under vacuum (1.52 g, 85% yield). <sup>1</sup>H NMR (400 MHz, CDCl<sub>3</sub>) δ 9.57 (s, 1H), 8.55 (d, *J* = 8.2 Hz, 1H), 8.27 (dd, *J* = 15.9, 6.5 Hz, 4H), 8.20 (t, *J* = 7.7 Hz, 2H), 8.13 – 8.04 (m, 2H), 4.66 (q, *J* = 6.9 Hz, 2H), 4.53 (q, *J* = 6.9 Hz, 2H), 1.41 (t, *J* = 7.0 Hz, 3H), 1.29 (t, *J* = 7.0 Hz, 3H); <sup>13</sup>C NMR (75 MHz, CDCl<sub>3</sub>) δ 179.12, 160.73, 158.29, 158.14, 134.65, 131.44, 131.04, 130.52, 129.93, 129.47, 129.03, 127.39, 127.32, 126.93, 126.84, 126.41, 124.32, 124.30, 123.81, 123.36, 118.88, 44.15, 43.62, 12.53, 12.47; HRMS (ESI MS) *m/z*: theor: 412.1245 found: 412.1242 ([M]<sup>+</sup> detected)

**Figure S11.** <sup>1</sup>H NMR spectrum of **Dye 11**

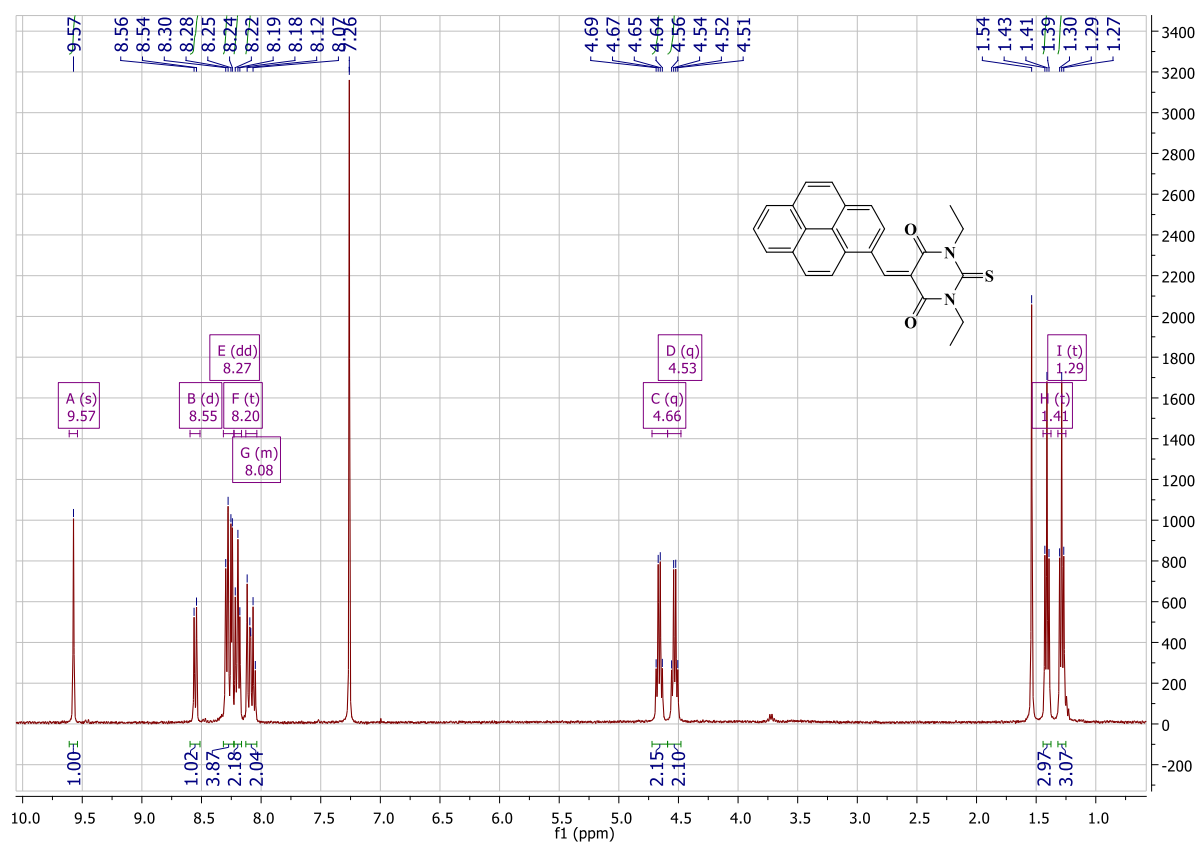

**Figure S12.**  $^{13}\text{C}$  NMR spectrum of **Dye 11**

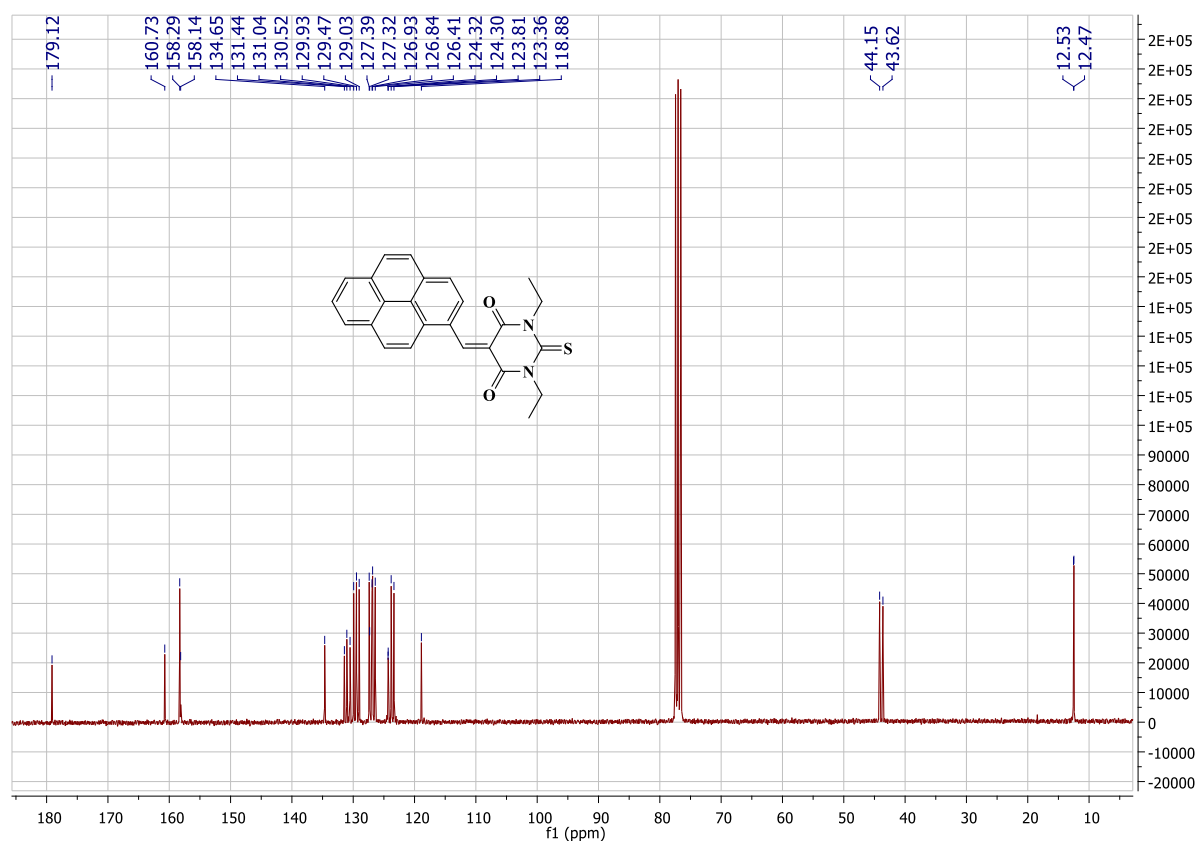

**Synthesis of 3-ethyl-5-(pyren-1-ylmethylene)-2-thioxothiazolidin-4-one **Dye 12****

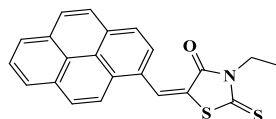

Chemical Formula:  $\text{C}_{22}\text{H}_{15}\text{NOS}_2$   
Molecular Weight: 373.4880

Pyrene-1-carbaldehyde (1 g, 4.34 mmol,  $M = 230.27$  g/mol) and 3-ethylrhodanine (0.70 g, 4.34 mmol,  $M = 161.25$  g/mol) were suspended in ethanol (50 mL) and a few drops of piperidine were added. The solution was refluxed overnight. Upon cooling, a precipitate formed. It was filtered off, washed several times with ether and pentane, and dried under vacuum (1.30 g, 80% yield).  $^1\text{H}$  NMR (300 MHz,  $\text{CDCl}_3$ )  $\delta$  8.76 (s, 1H), 8.42 (d,  $J = 9.3$  Hz, 1H), 8.28 – 8.11 (m, 5H), 8.05 (t,  $J = 6.9$  Hz, 3H), 4.27 (q,  $J = 7.1$  Hz, 2H), 1.36 (t,  $J = 7.1$  Hz, 3H);  $^{13}\text{C}$  NMR (75 MHz,  $\text{CDCl}_3$ )  $\delta$  193.66, 167.40, 133.03, 131.27, 130.97, 130.66, 130.01, 129.53, 129.24, 127.25, 126.91, 126.60, 126.56, 126.43, 125.66, 125.09, 125.01, 124.91, 124.34, 122.35, 39.84, 12.32; HRMS (ESI MS)  $m/z$ : theor: 373.05955 found: 373.0590 ( $[\text{M}]^+$  detected)

**Figure S13.**  $^1\text{H}$  NMR spectrum of **Dye 12**

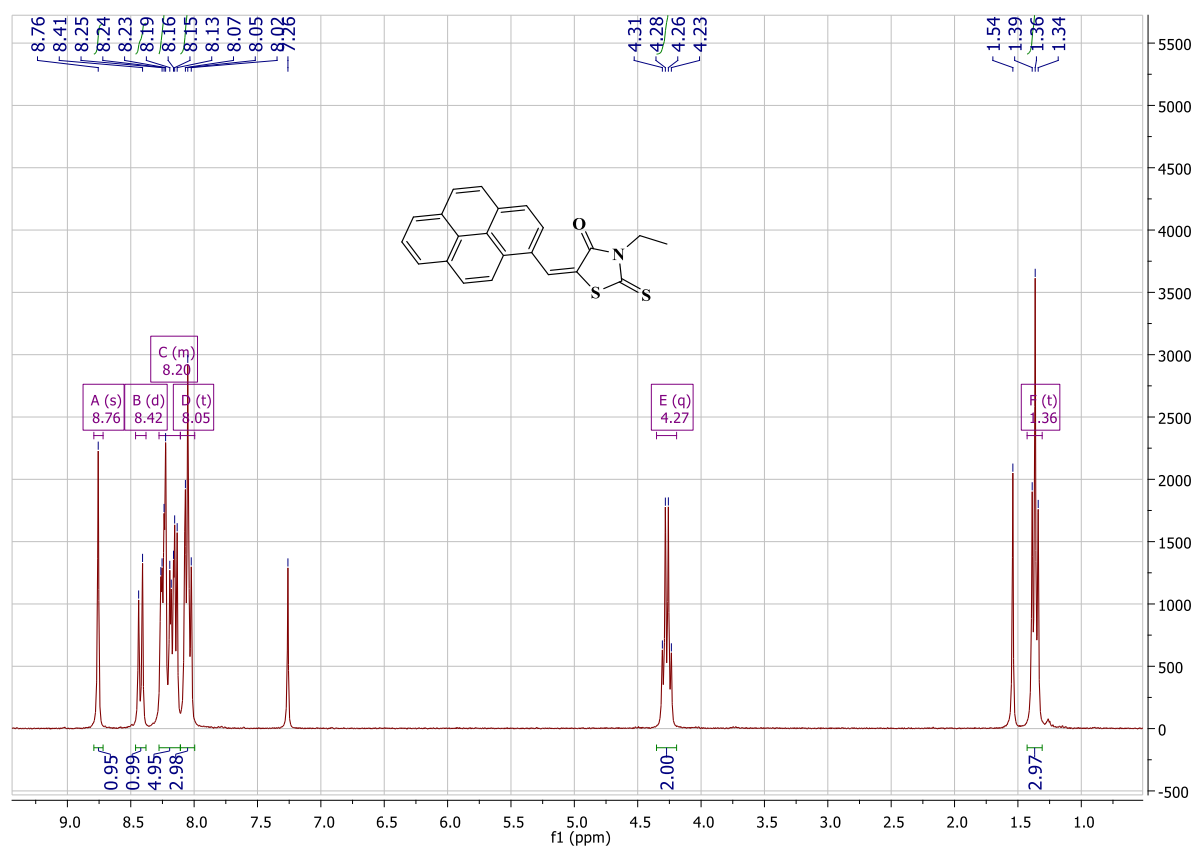

**Figure S14.**  $^{13}\text{C}$  NMR spectrum of **Dye 12**

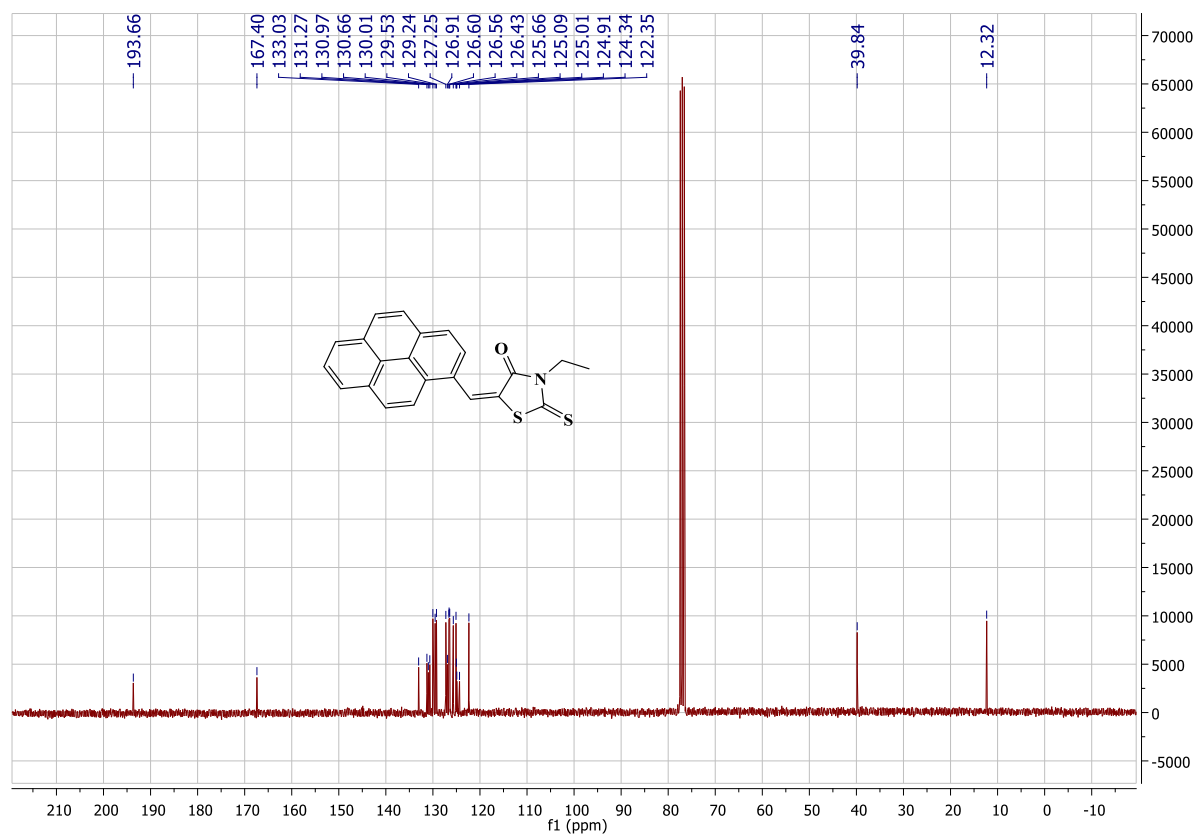

## Synthesis of 3-allyl-5-(pyren-1-ylmethylene)-2-thioxothiazolidin-4-one **Dye 13**

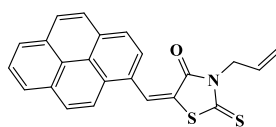

Chemical Formula:  $C_{23}H_{15}NOS_2$   
Molecular Weight: 385.4990

Pyrene-1-carbaldehyde (1 g, 4.34 mmol,  $M = 230.27$  g/mol) and 3-allylrhodanine (0.75 g, 4.34 mmol,  $M = 173.26$  g/mol) were suspended in ethanol (50 mL) and a few drops of piperidine were added. The solution was refluxed overnight. Upon cooling, a precipitate formed. It was filtered off, washed several times with ether and pentane, and dried under vacuum (1.37 g, 82% yield).  $^1H$  NMR (400 MHz,  $CDCl_3$ )  $\delta$  8.81 (s, 1H), 8.46 (d,  $J = 9.3$  Hz, 1H), 8.29 – 8.04 (m, 8H), 5.99 – 5.88 (m, 1H), 5.34 (ddd,  $J = 13.7, 11.4, 1.2$  Hz, 2H), 4.83 (dt,  $J = 5.9, 1.3$  Hz, 2H); HRMS (ESI MS)  $m/z$ : theor: 385.0595 found: 385.0598 ( $[M]^+$  detected); Anal. Calc. for  $C_{23}H_{15}NOS_2$ : C, 71.7; H, 3.9; O, 4.1; Found: C, 71.4; H, 3.7; N, 4.4 %

**Figure S15.**  $^1H$  NMR spectrum of **Dye 13**

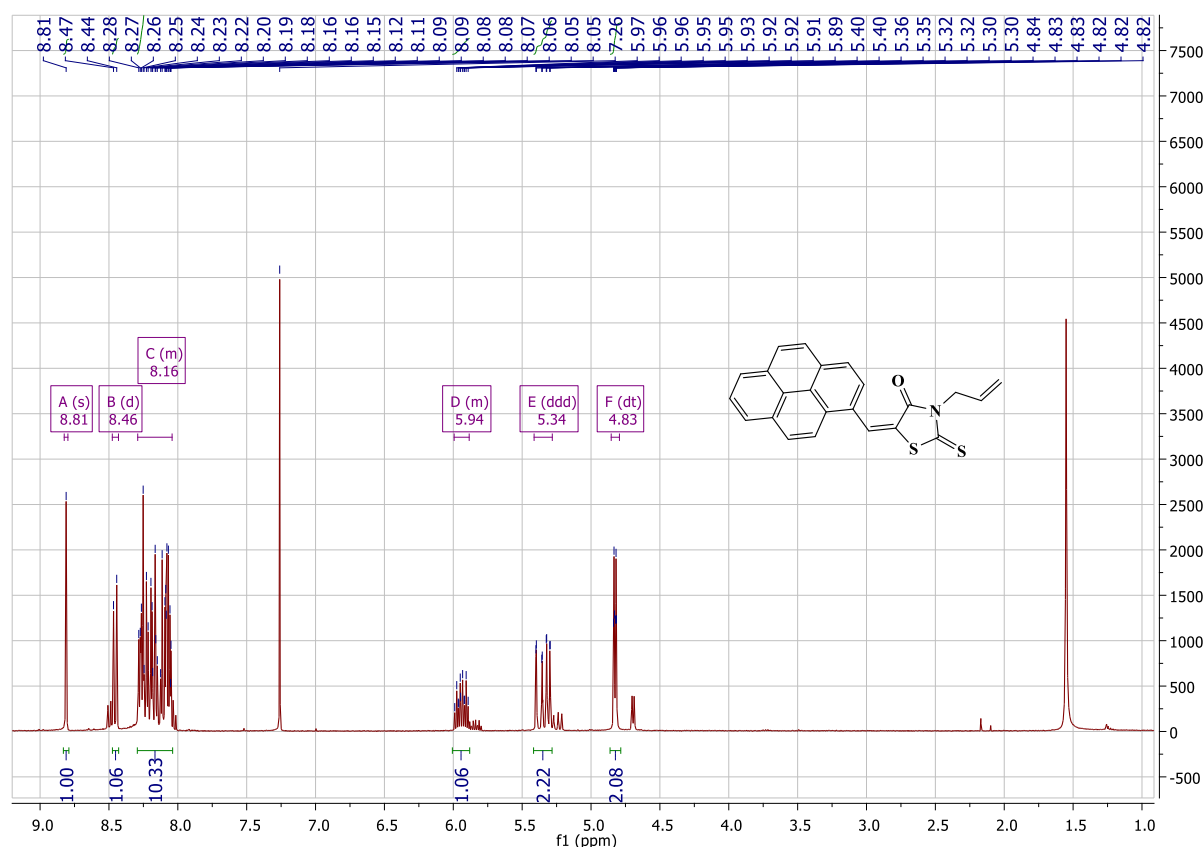

Synthesis of 2-(3-cyano-5,5-dimethyl-4-(2-(pyren-1-yl)vinyl)furan-2(5*H*)-ylidene) malononitrile **Dye 14**

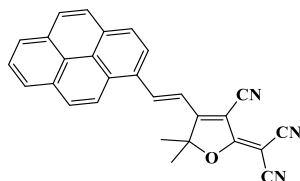

Chemical Formula:  $C_{28}H_{17}N_3O$   
Molecular Weight: 411.4640

2-(3-Cyano-4,5,5-trimethylfuran-2(5*H*)-ylidene)malononitrile (1 g, 5.02 mmol,  $M = 199.21$  g/mol) and pyrene-1-carbaldehyde (1.16 g, 5.02 mmol,  $M = 230.27$  g/mol) were dissolved in absolute ethanol (20 mL) and a few drops of piperidine were added. The solution was refluxed overnight. After cooling, the solvent was removed under reduced pressure. Addition of ether followed by pentane precipitated a blue solid that was filtered off, washed several times with pentane and dried under vacuum (1.69 g, 82% yield). Due to its insolubility, no  $^1H$  NMR spectrum could be acquired. HRMS (ESI MS)  $m/z$ : theor: 411.1372 found: 411.1373 ( $[M]^{+}$  detected); Anal. Calc. for  $C_{28}H_{17}N_3O$ : C, 81.7; H, 4.2; O, 3.9; Found: C, 81.4; H, 3.9; N, 4.1 %

Synthesis of 2-(pyren-1-ylmethylene)-[1,2'-biindenylidene]-1',3,3'(2*H*)-trione **Dye 15**

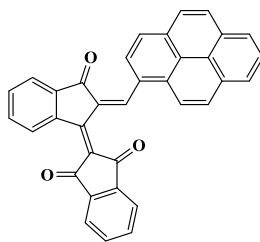

Chemical Formula:  $C_{35}H_{18}O_3$   
Molecular Weight: 486.5260

To a mixture of [1,2']-biindenylidene-3,1',3'-trione (0.5 g, 1.28 mmol,  $M = 274.28$  g/mol) and 2-pyrenecarbaldehyde (0.42 g, 1.28 mmol, 230.27 g/mol) was added acetic anhydride so that the powder was covered by the liquid. The reaction mixture was heated at 90°C overnight. After cooling, ether was added. A red precipitate formed. It was filtered off, washed several times with ether and dried under vacuum to remove the traces of acetic anhydride (0.55 g, 88% yield).  $^1H$  NMR (400 MHz,  $CDCl_3$ )  $\delta$  9.39 (d,  $J = 7.5$  Hz, 1H), 9.30 (dd,  $J = 17.0, 7.9$  Hz, 2H), 8.05 (d,  $J = 7.4$  Hz, 1H), 7.89 – 7.79 (m, 3H), 7.75 (dt,  $J = 19.1, 6.1$  Hz, 3H), 7.68 (d,  $J = 7.7$  Hz, 1H), 7.61 (t,  $J = 7.1$  Hz, 1H), 7.58 – 7.49 (m, 2H), 7.39 (t,  $J = 7.4$  Hz, 1H), 7.28 (s, 3H); HRMS (ESI MS)  $m/z$ : theor: 486.1256 found: 486.1251 ( $[M]^{+}$  detected); Anal. Calc. for  $C_{35}H_{18}O_3$ : C, 86.4; H, 3.7; O, 9.9; Found: C, 86.4; H, 3.9; N, 10.1 %



**Figure S16.**  $^1\text{H}$  NMR spectrum of **Dye 15**

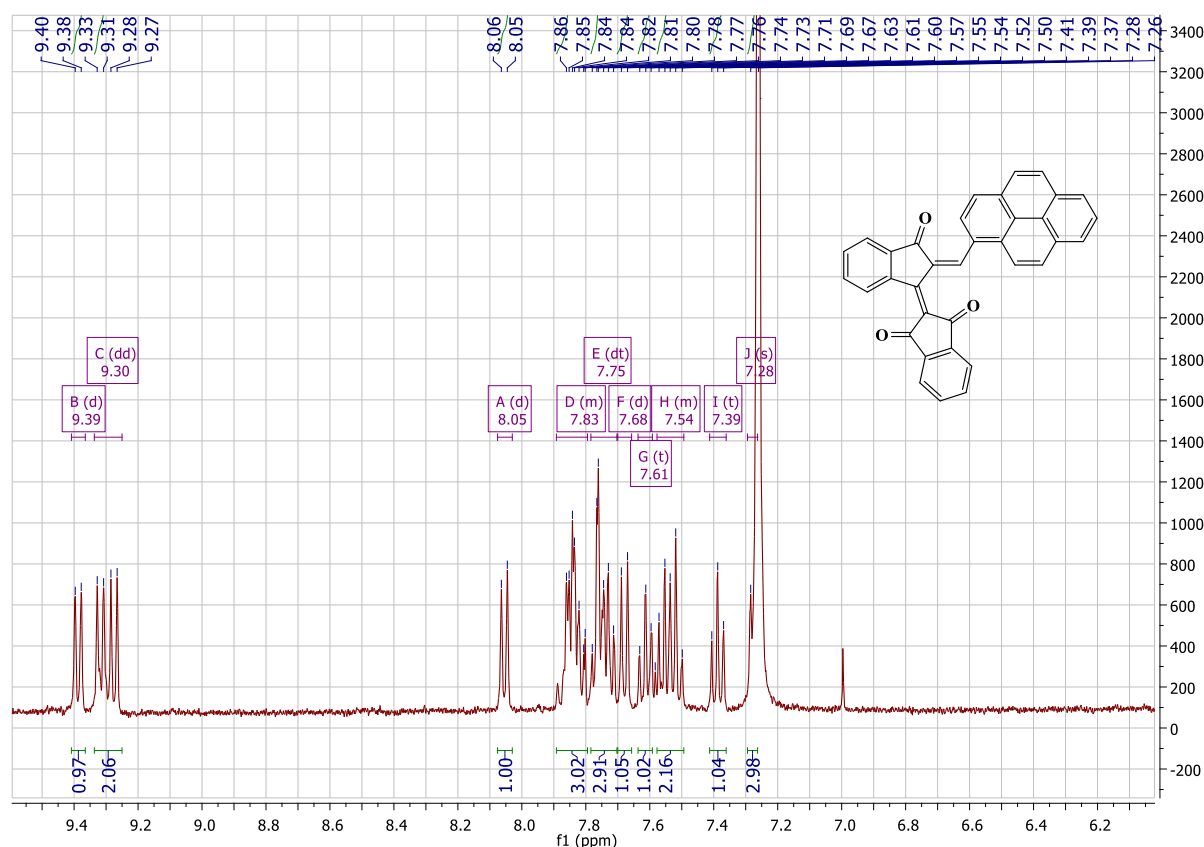

**Synthesis of 2-(3-Oxo-2,3-dihydro-1H-cyclopenta[b]naphthalen-1-ylidene)malononitrile **EA7****

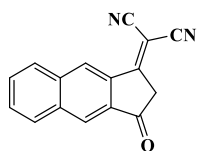

Chemical Formula:  $\text{C}_{16}\text{H}_8\text{N}_2\text{O}$   
Molecular Weight: 244.2530

In a dried two-necked 100 mL flask, 1H-cyclopenta[b]naphthalene-1,3(2H)-dione (1.1 g, 5.6 mmol) and malononitrile (2.2 g, 33.3 mmol) were dissolved in ethanol (25 mL), and then anhydrous sodium acetate (1.84 g) was slowly added while stirring. After stirring for 2 h, the reaction mixture was poured into ice-water, and acidified to pH 1–2 by the addition of concentrated hydrochloric acid. The resulting precipitate was collected by filtration and washed with water giving the crude product. It was finally purified with a flash chromatography (eluent : DCM). Yield = 67%.  $^1\text{H}$  NMR (400 MHz,  $\text{CDCl}_3$ )  $\delta$ : 3.85 (s, 2H), 7.79 (dd, 2H,  $J = 6.2$  Hz,  $J = 3.2$  Hz), 8.07–8.19 (m, 2H), 8.49 (s, 1H), 9.19 (s, 1H);  $^{13}\text{C}$  NMR (100 MHz,  $\text{CDCl}_3$ )  $\delta$ : 44.6, 112.3, 112.6, 125.8, 128.1, 130.5, 130.6, 130.7, 130.9, 135.8, 136.3, 136.4, 166.5, 195.3; HRMS (ESI MS)  $m/z$ : theor: 244.0637 found: 244.0640 ( $[\text{M}]^+$  detected)

**Figure S17.**  $^1\text{H}$  NMR spectrum in  $\text{CDCl}_3$

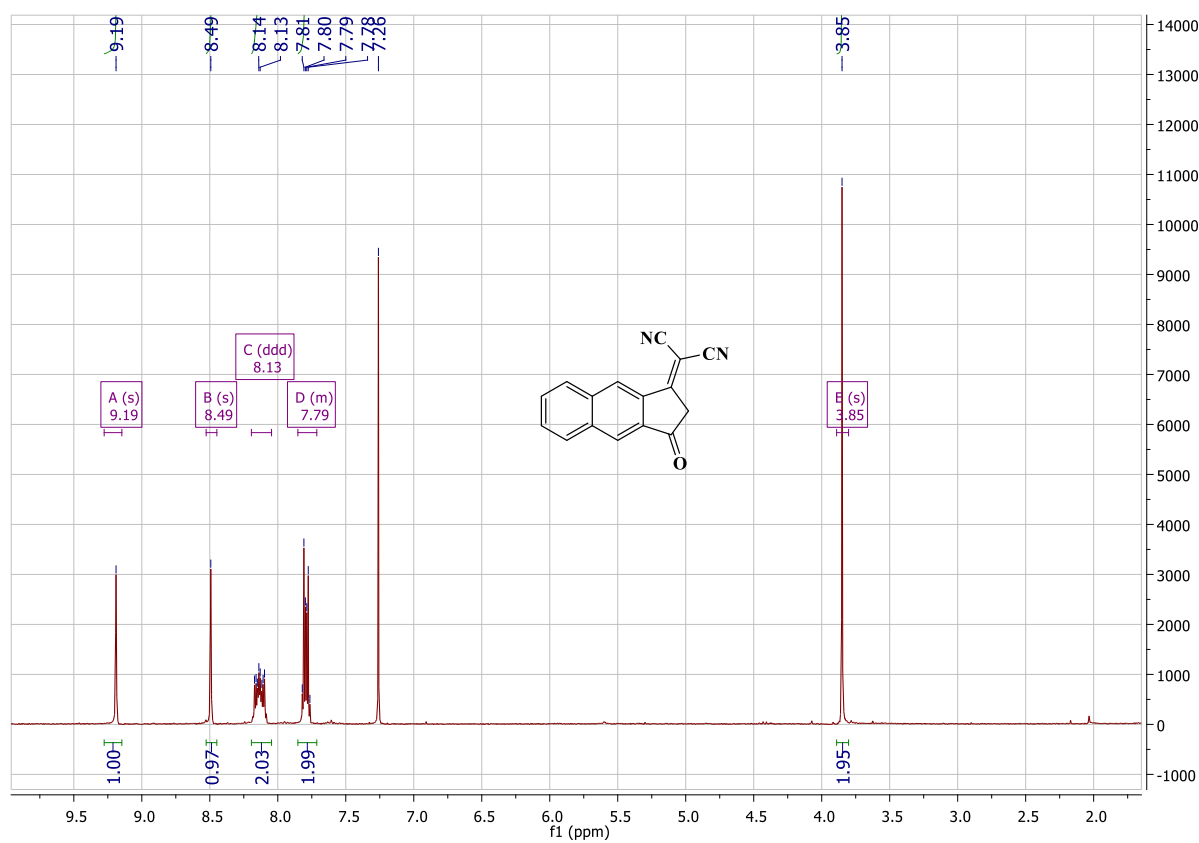

**Figure S18.**  $^{13}\text{C}$  NMR spectrum in  $\text{CDCl}_3$

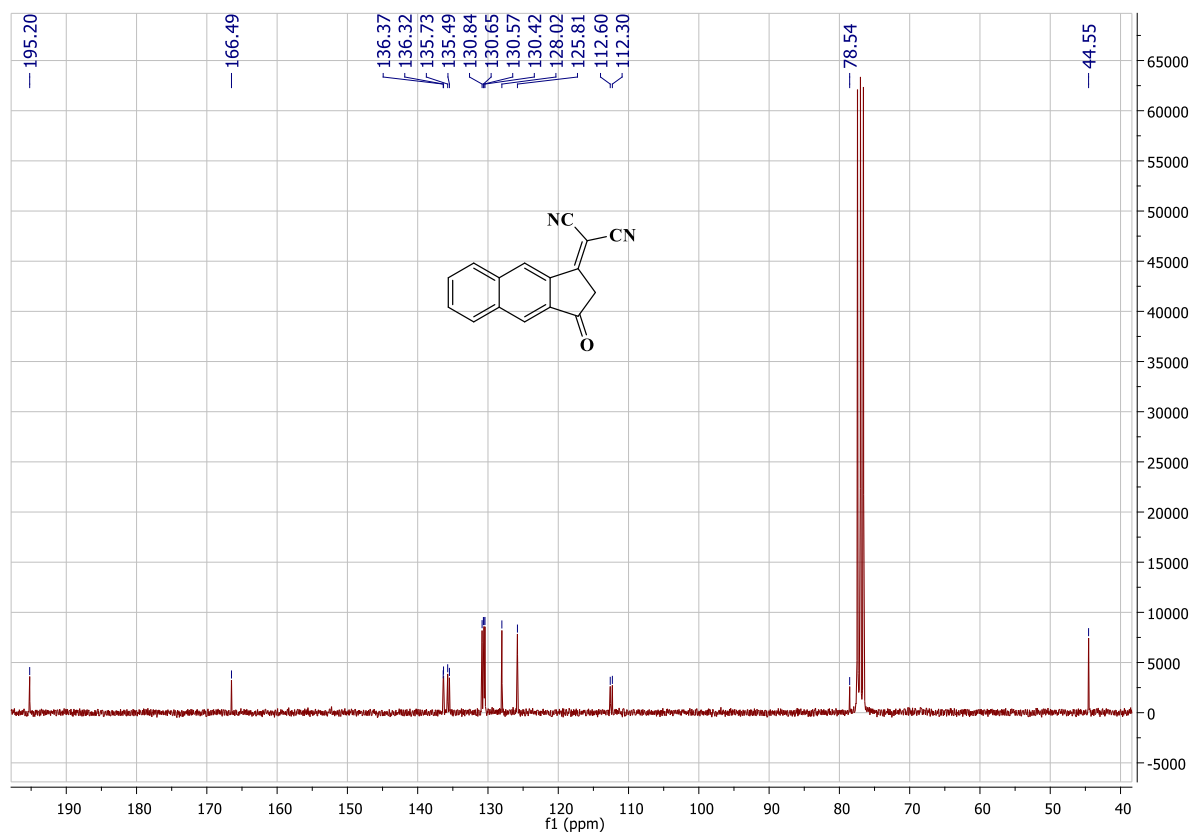

## Synthesis of [1,2']biindenylidene-3,1',3'-trione **EA15**

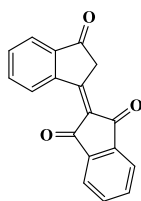

Chemical Formula: C<sub>18</sub>H<sub>10</sub>O<sub>3</sub>  
Molecular Weight: 274.2750

A solution of 1,3-indanedione (2.04 g, 14.0 mmol) in absolute ethanol (25 mL) was stirred for 5 min, before NaOAc (1.53 g, 18.6 mmol) was added. After 1 h of stirring at room temperature, the reaction mixture was diluted with ~50 mL of water. The solution was acidified with conc. HCl to a pH of ~1, the green precipitate was filtered off and dried under vacuum (1.55 g, 81% yield). <sup>1</sup>H NMR (CDCl<sub>3</sub>) δ 4.17 (s, 2H), 7.73-7.77 (m, 1H), 7.81-7.88 (m, 3H), 7.94-7.98 (m, 2H), 8.01-8.03 (m, 1H), 9.68 (m, 1H, J = 8.1 Hz); <sup>13</sup>C NMR (CDCl<sub>3</sub>) δ 43.4, 123.1, 123.4, 123.5, 125.9, 131.7, 134.2, 135.3, 135.3, 135.4, 140.5, 141.3, 141.7, 145.9, 155.4, 189.4, 191.1, 200.9; HRMS (ESI MS) m/z: theor: 274.0630 found: 274.0633 (M<sup>+</sup> detected).

**Figure S19.**  $^1\text{H}$  NMR of [1,2']Biindenylidene-3,1',3'-trione **EA15**

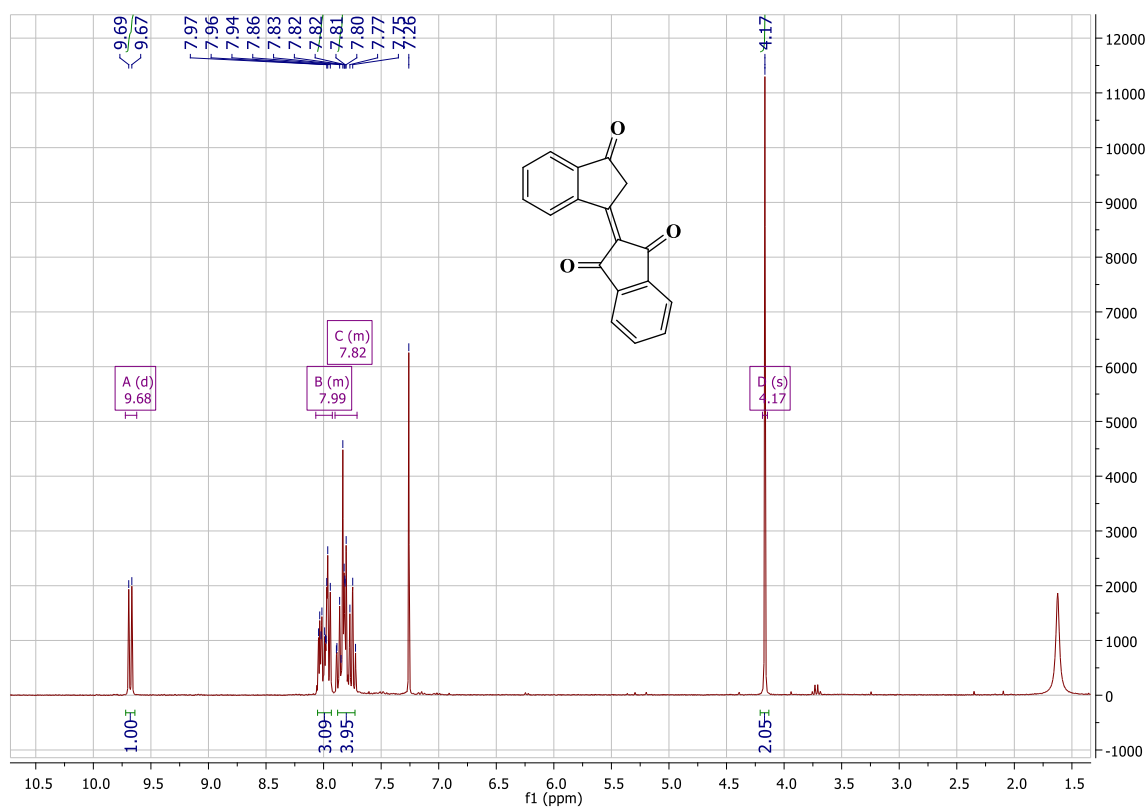

**Figure S20.**  $^{13}\text{C}$  NMR of [1,2']Biindenylidene-3,1',3'-trione **EA15**

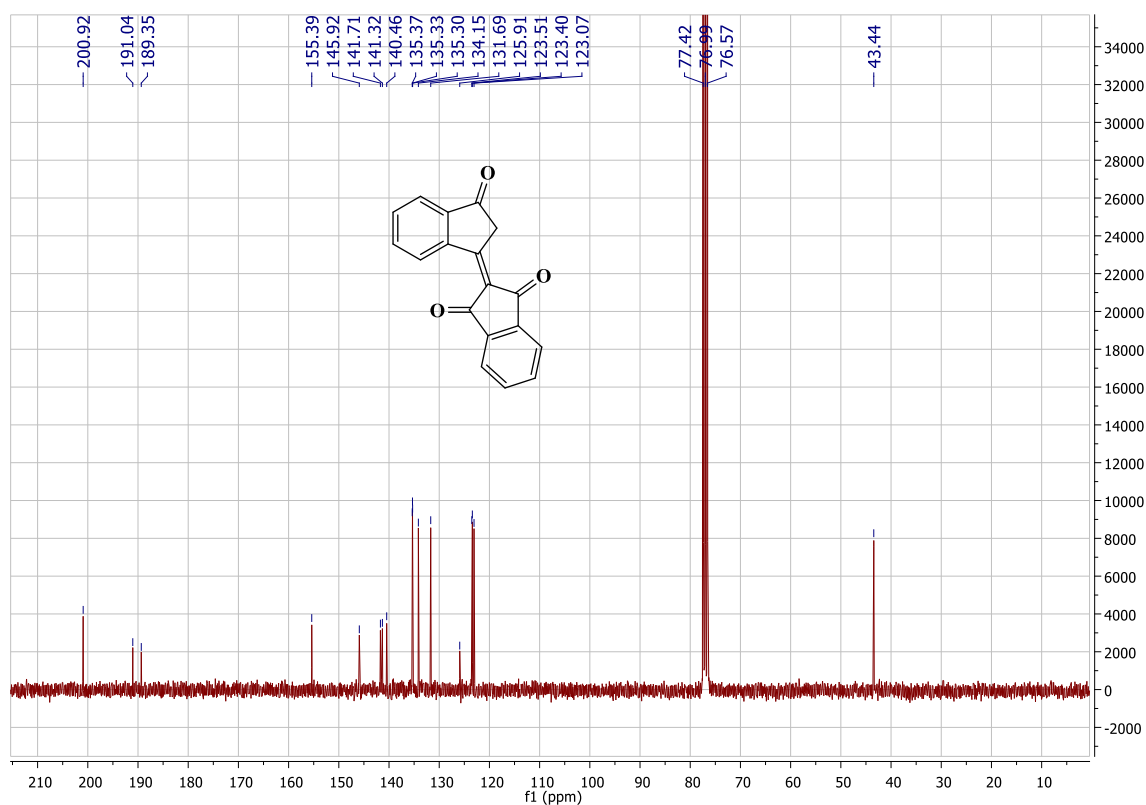

## UV-visible absorption spectra in twenty-three solvents of different polarities

Figure S21. UV-visible absorption spectra of **Dye 1**.

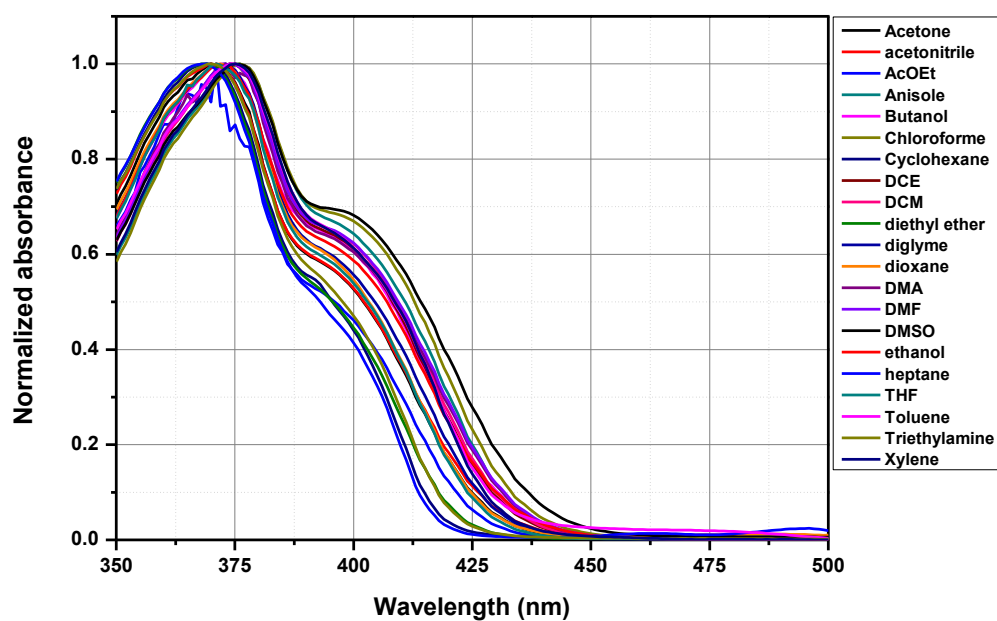

Figure S22. UV-visible absorption spectra of **Dye 2**.

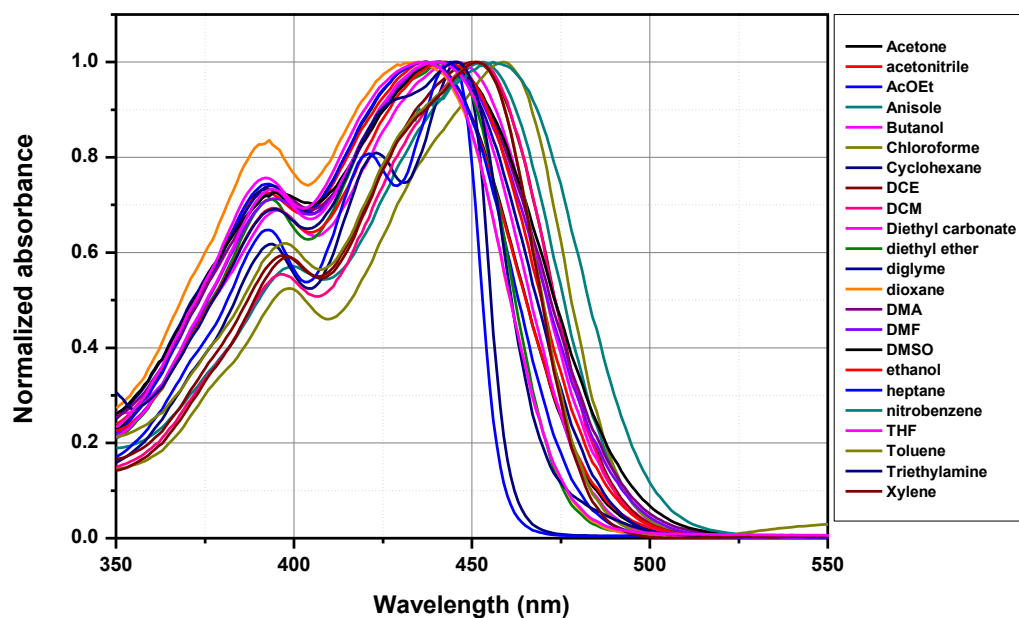

**Figure S23.** UV-visible absorption spectra of **Dye 3**.

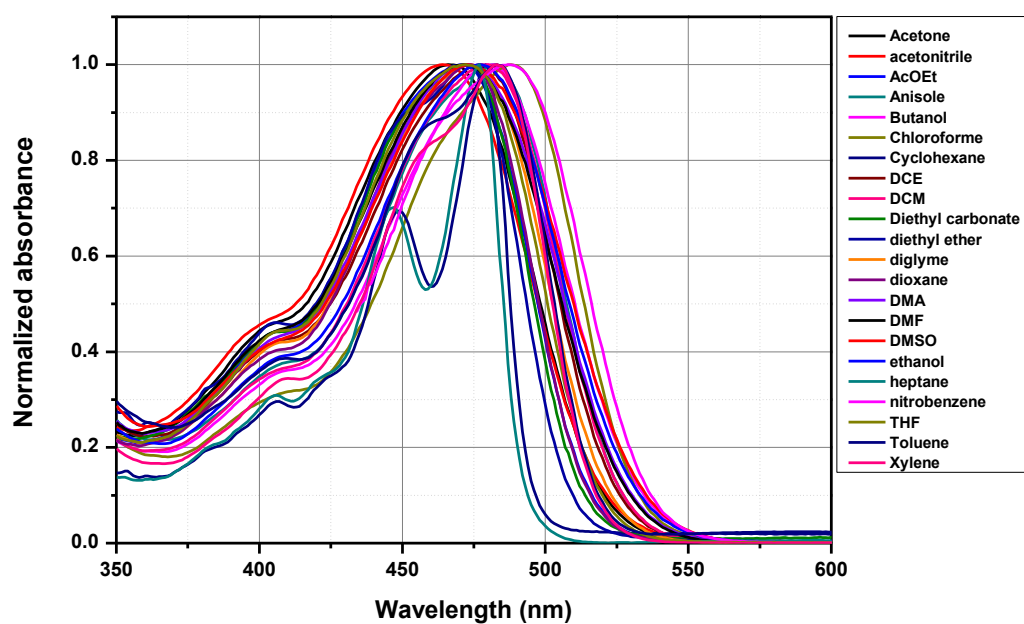

**Figure S24.** UV-visible absorption spectra of **Dye 4**.

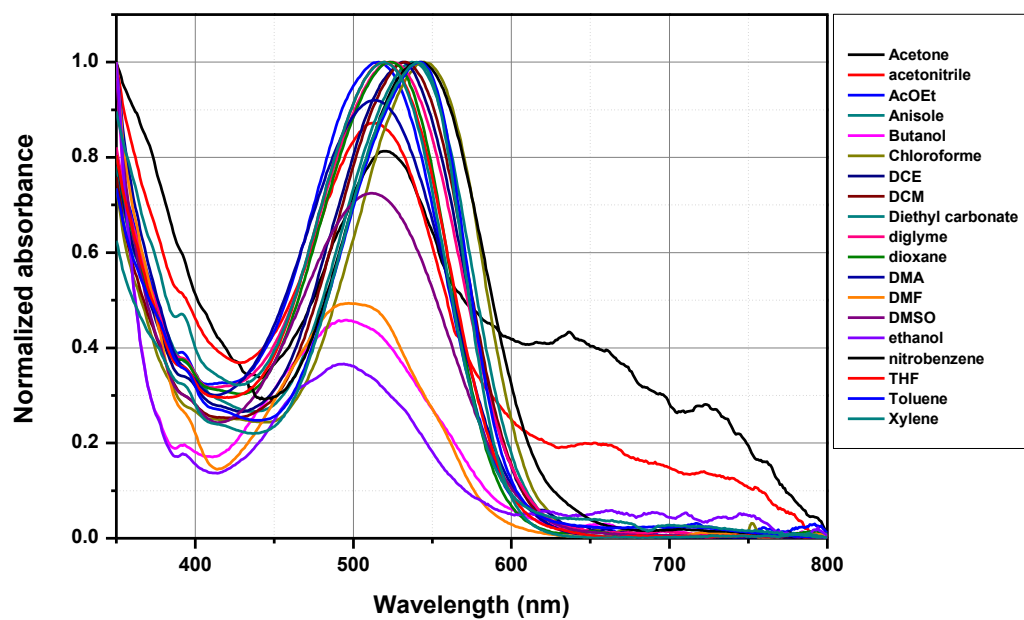

Figure S25. UV-visible absorption spectra of **Dye 5**.

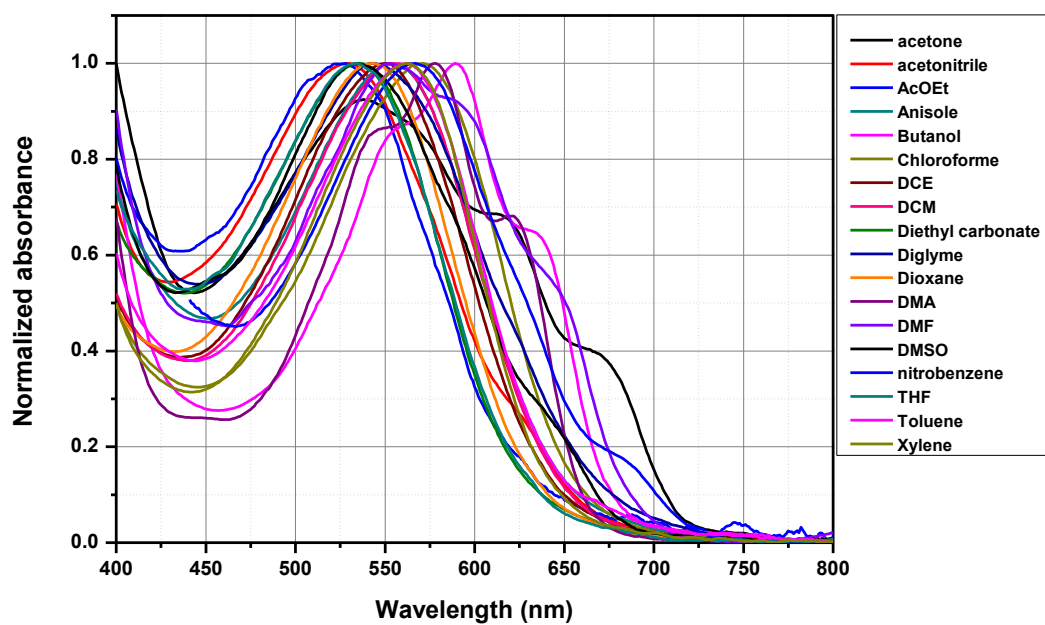

Figure S26. UV-visible absorption spectra of **Dye 6**.

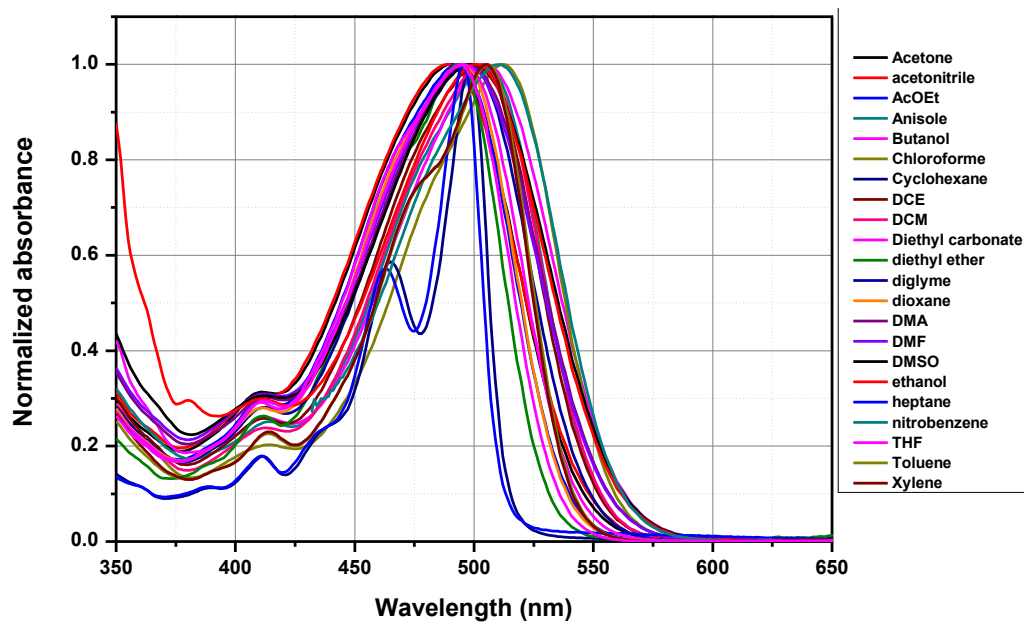

**Figure S27.** UV-visible absorption spectra of **Dye 7**.

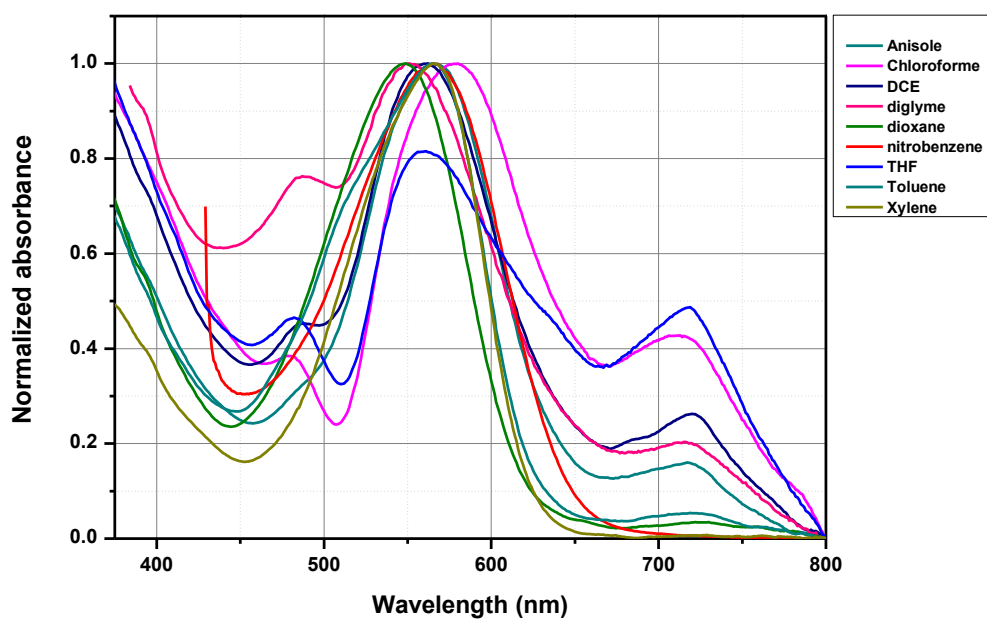

**Figure S28.** UV-visible absorption spectra of **Dye 8**.

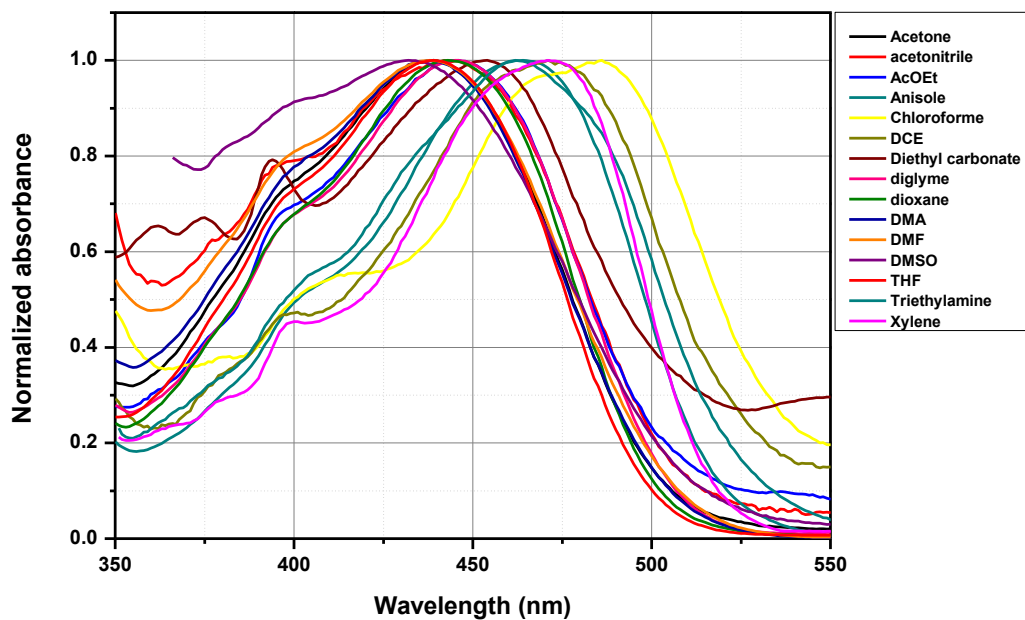



**Figure S29.** UV-visible absorption spectra of **Dye 9**.

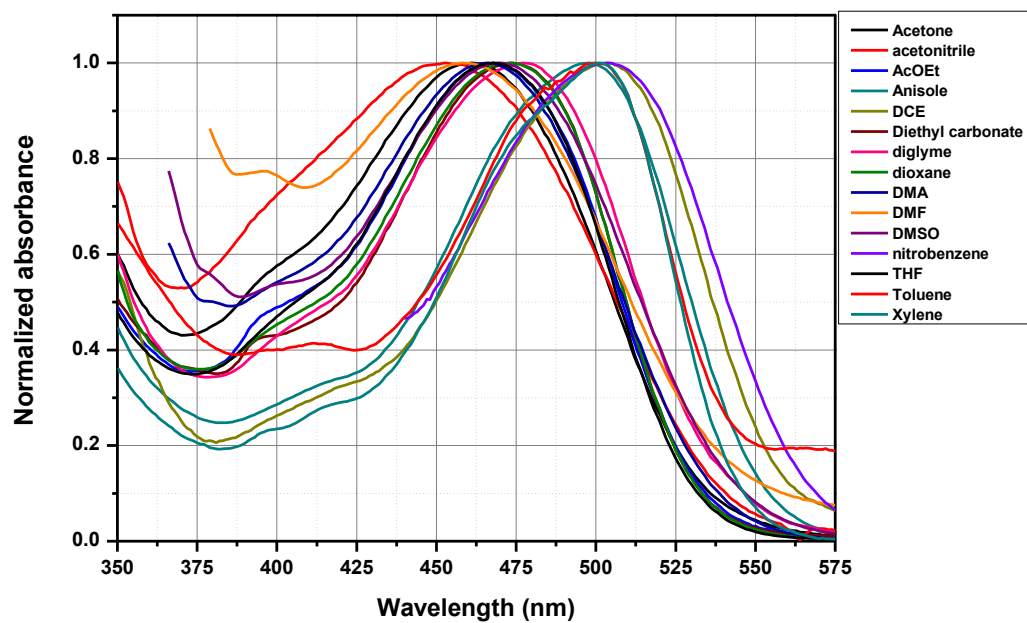

**Figure S30.** UV-visible absorption spectra of **Dye 10**.

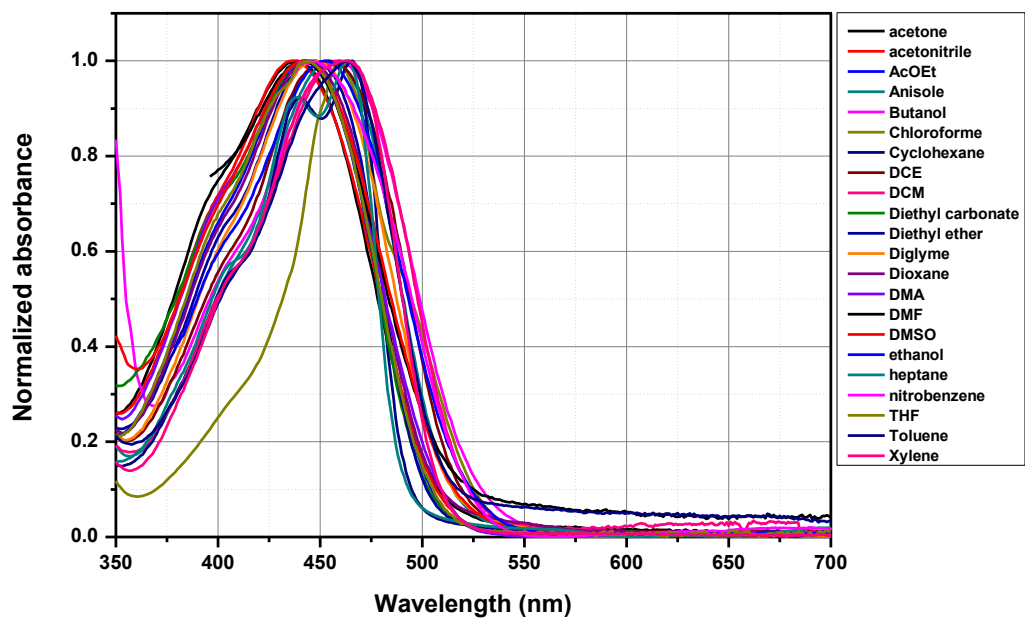

Figure S31. UV-visible absorption spectra of **Dye 11**.

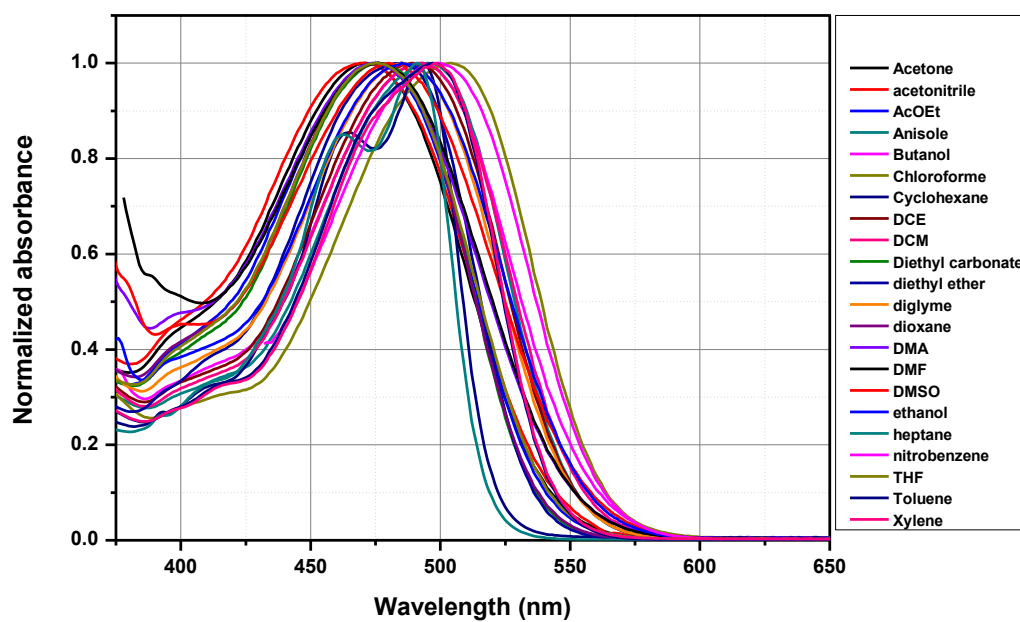

Figure S32. UV-visible absorption spectra of **Dye 12**.

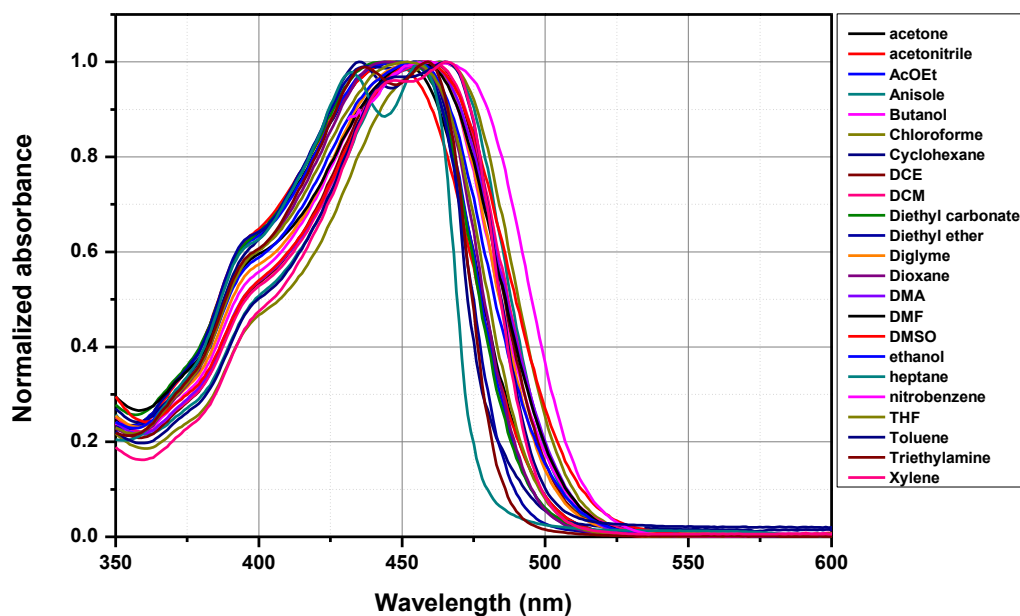

**Figure S33.** UV-visible absorption spectra of **Dye 13**.

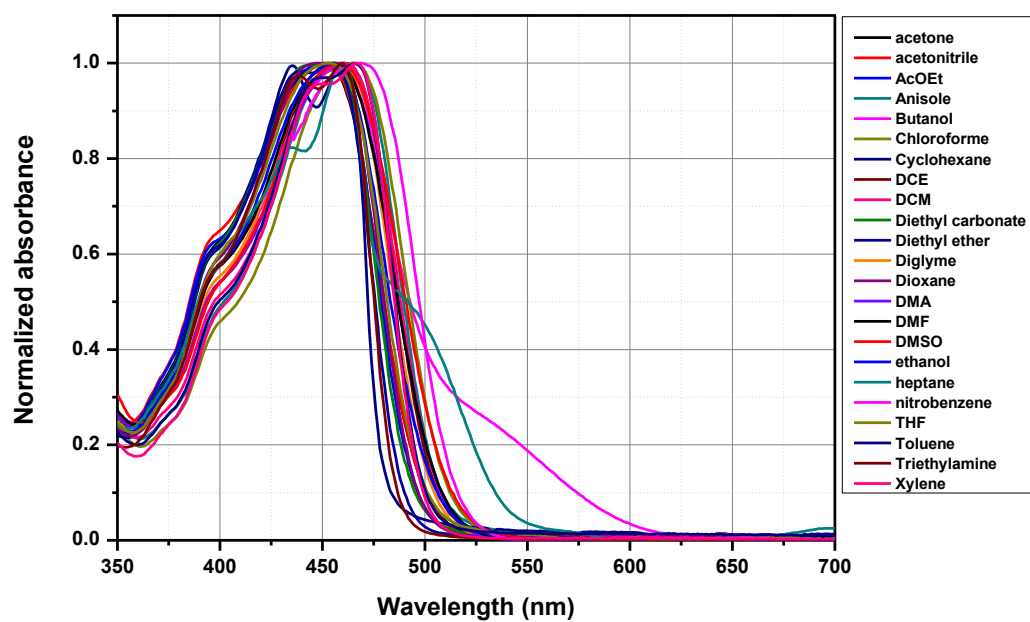

**Figure S34.** UV-visible absorption spectra of **Dye 14**.

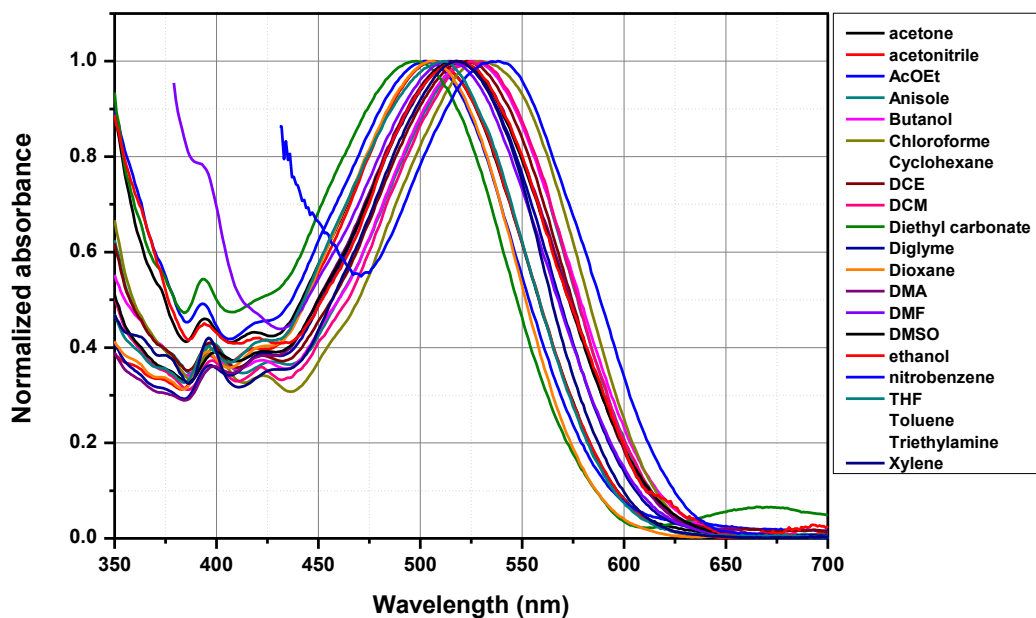

**Figure S35.** UV-visible absorption spectra of **Dye 15**.

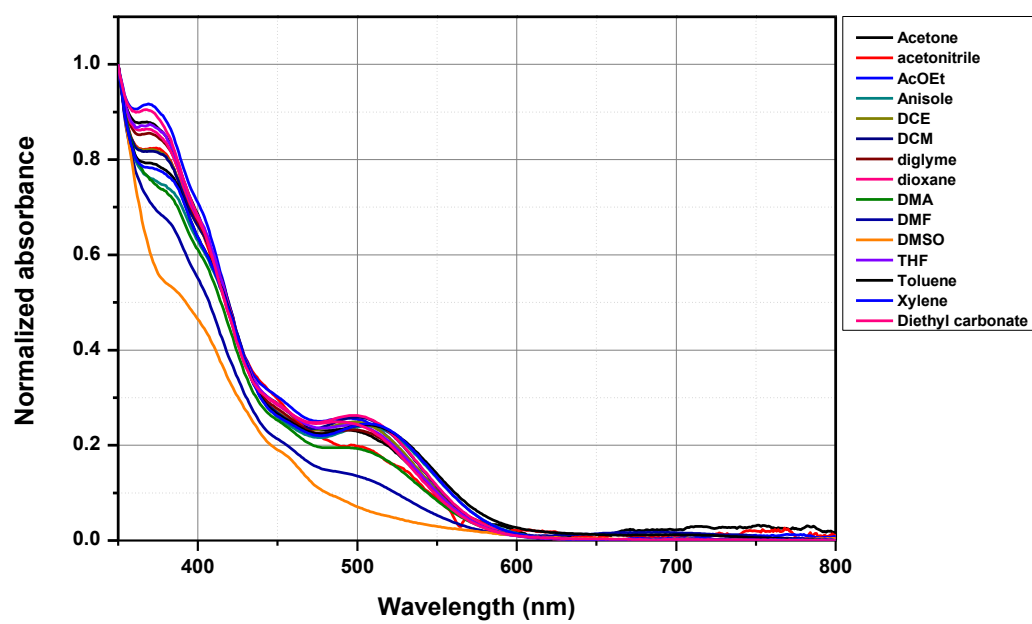

Position of the absorption maxima of PP1-PP15 in twenty-three solvents of different polarities vs. the Kamlet–Taft parameters  $\pi^*$

Figure S36. **Dye 1**

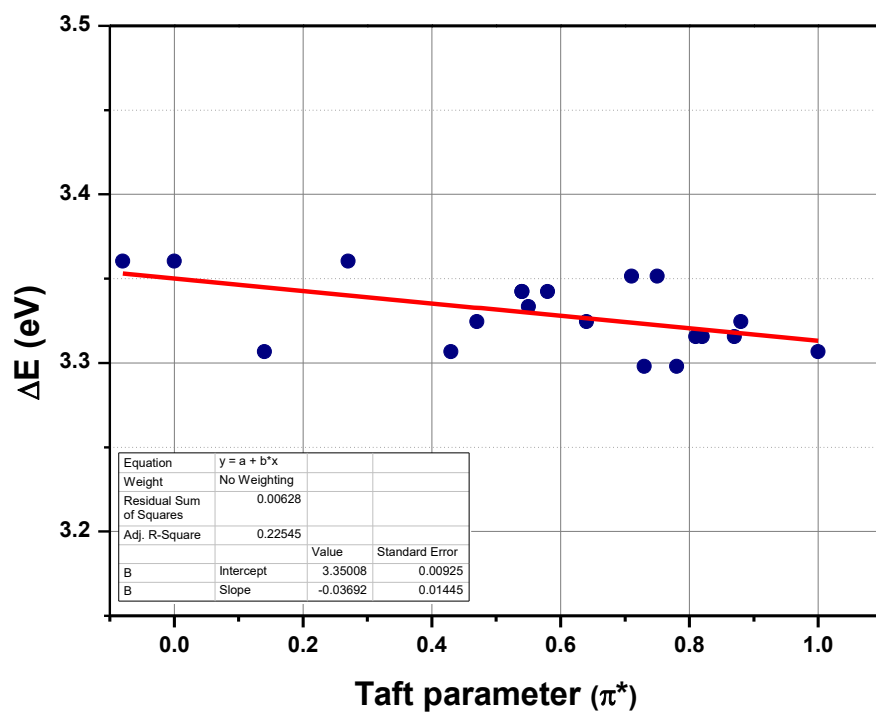

$$y = -0.03692x + 3.35008$$

$$R^2 = 0.22545$$

Figure S37. **Dye 2**

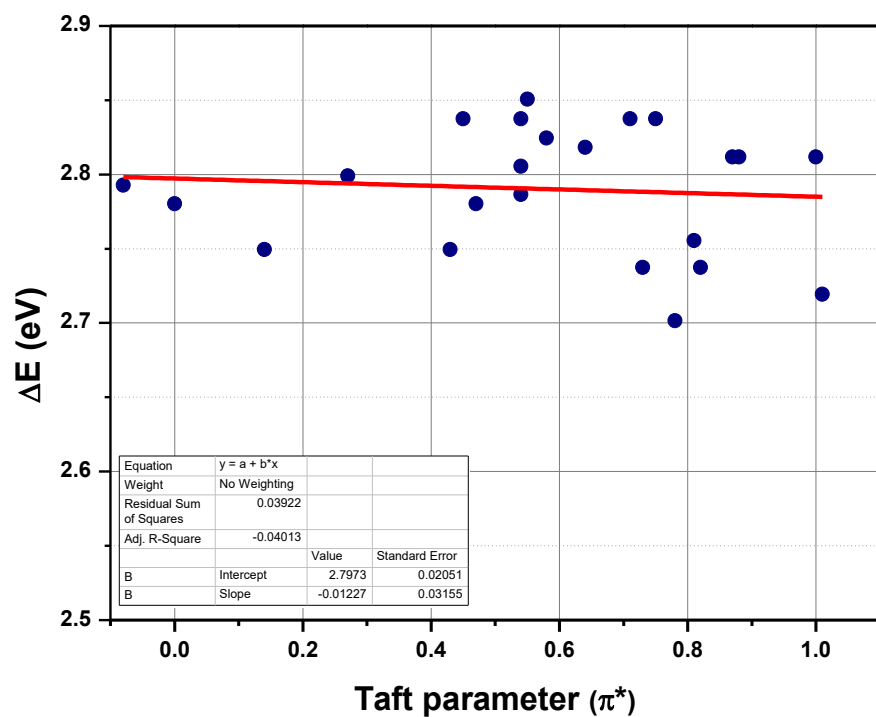

$$y = -0.01227x + 2.7973$$

$$R^2 = -0.040$$

Figure S38. **Dye 3**

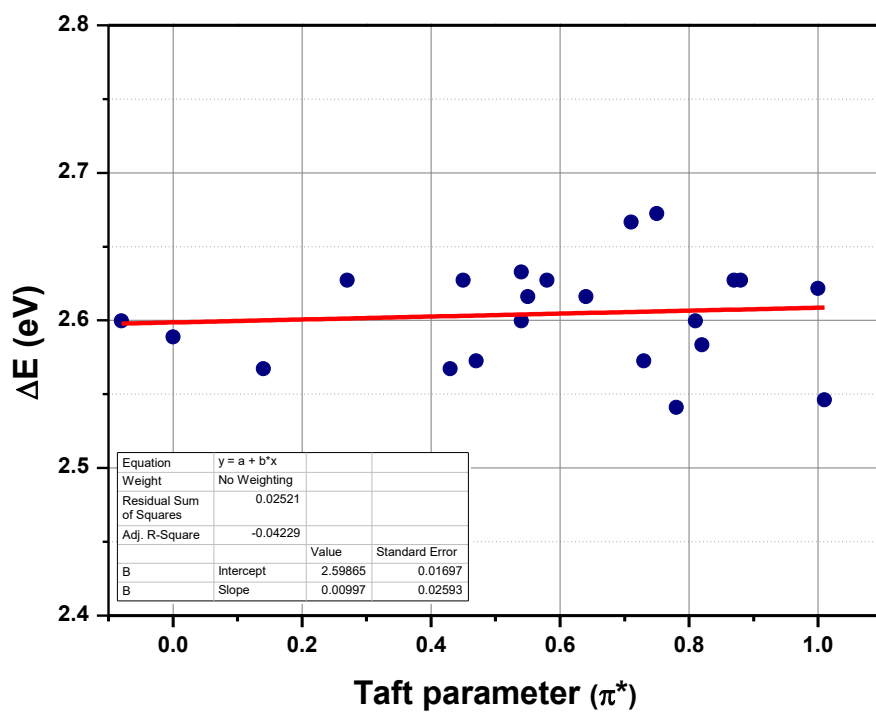

$$y = 0.00997x + 2.59865$$

$$R^2 = -0.042$$

Figure S39. **Dye 4**

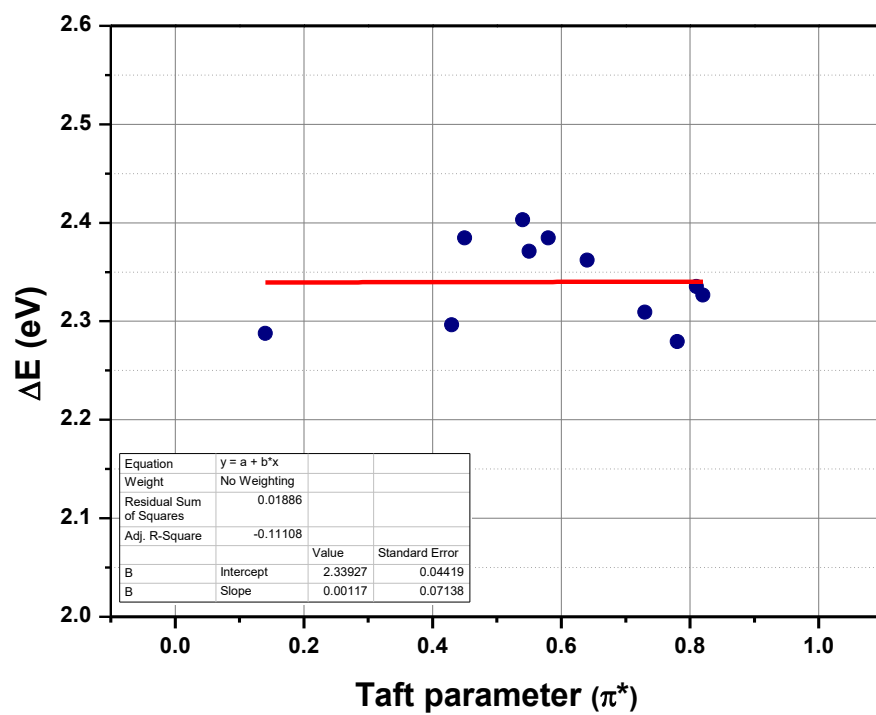

$$y = 0.00117x + 2.33927$$

$$R^2 = -0.111$$

Figure S40. **Dye 5**

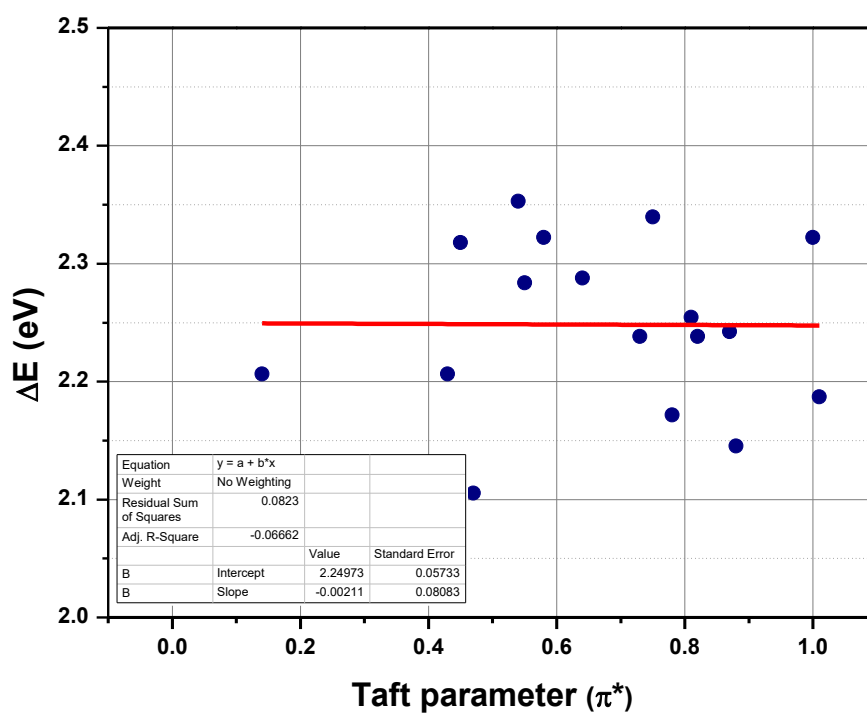

$$y = -0.00211 x + 2.24973$$

$$R^2 = -0.06662$$

Figure S41. **Dye 6**

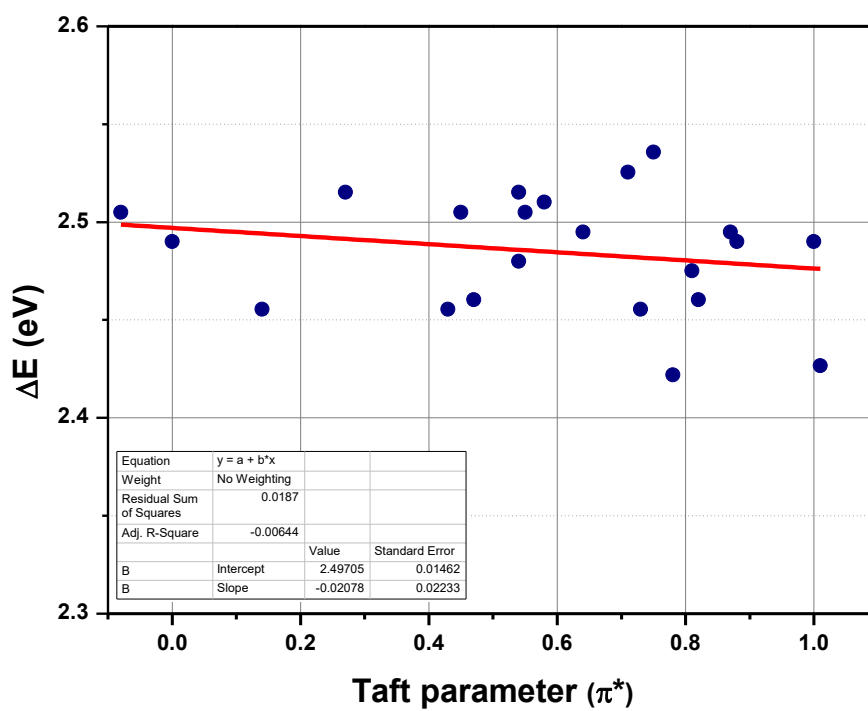

$$y = 0.02078 x + 2.49705$$

$$R^2 = -0.00644$$

Figure S42. **Dye 8**

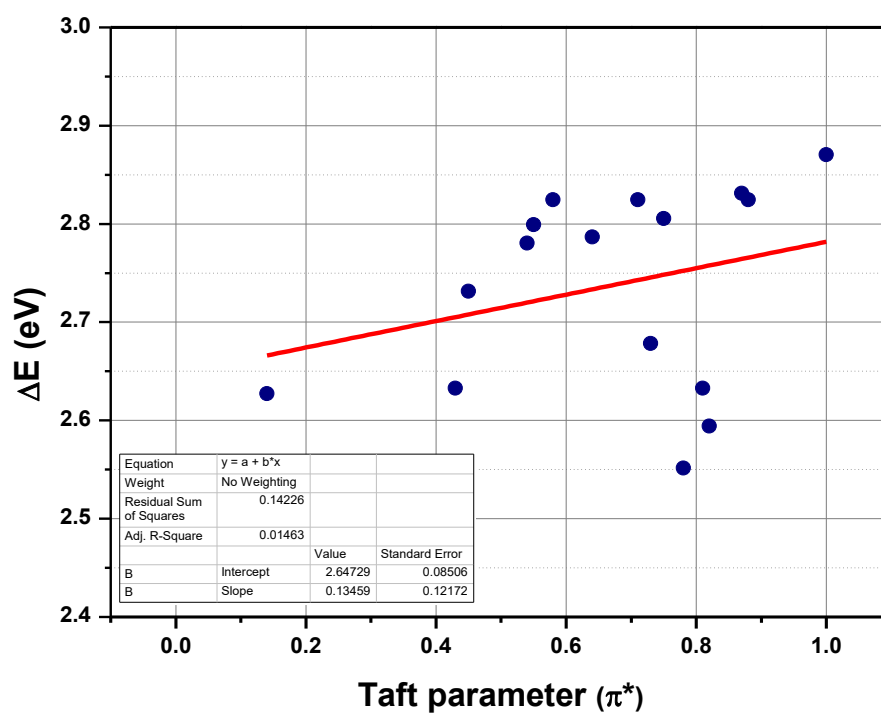

$$y = 0.13459 x + 2.64729$$

$$R^2 = 0.014$$

Figure S43. **Dye 9**

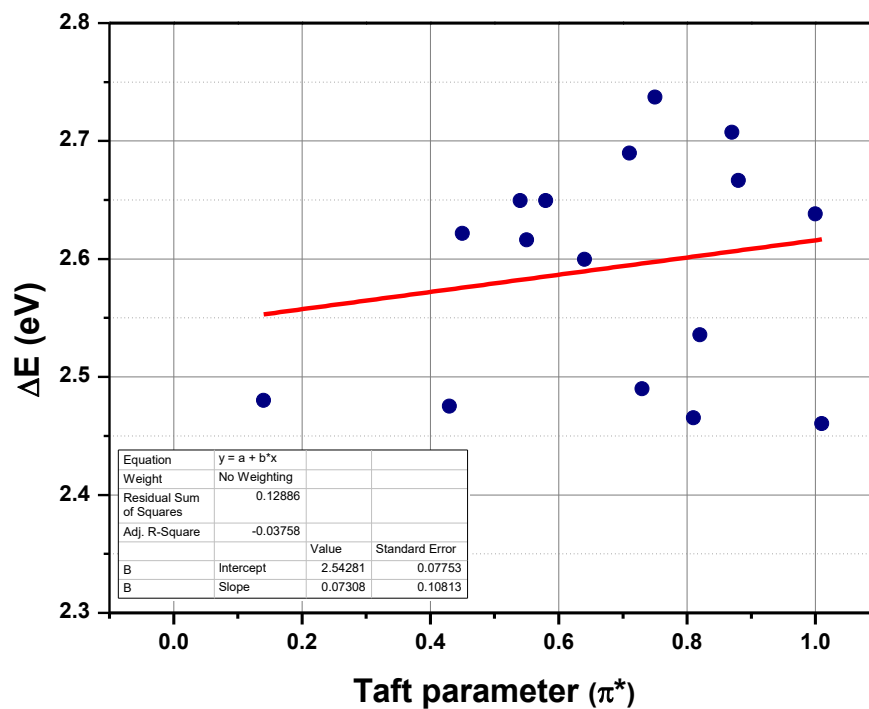

$$y = 0.0708 x + 2.54281$$

$$R^2 = -0.037$$



Figure S44. **Dye 10**

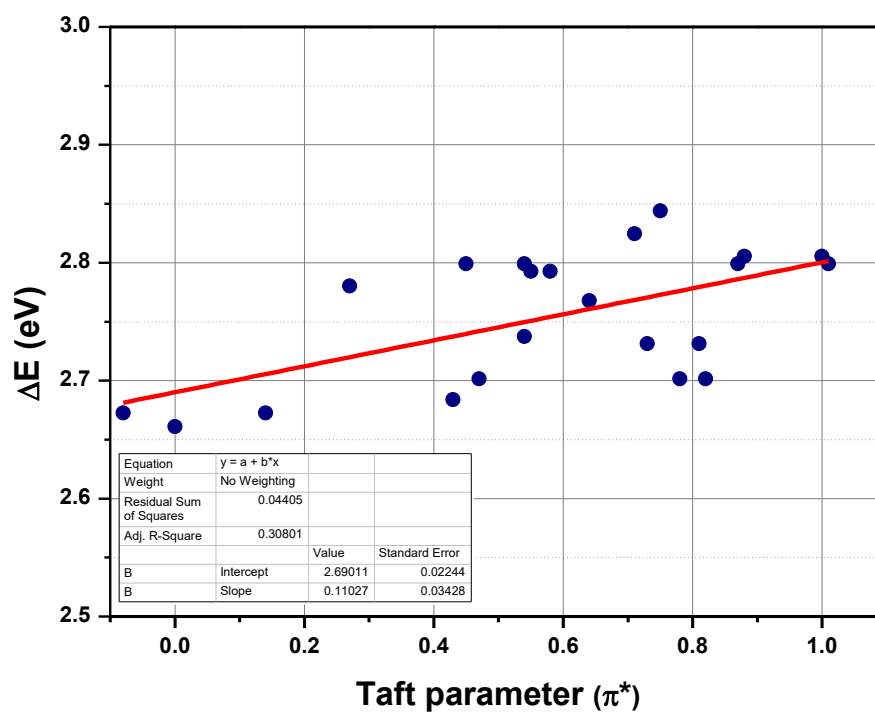

$$y = 0.11027 x + 2.69011$$

$$R^2 = 0.308$$

Figure S45. **Dye 11**

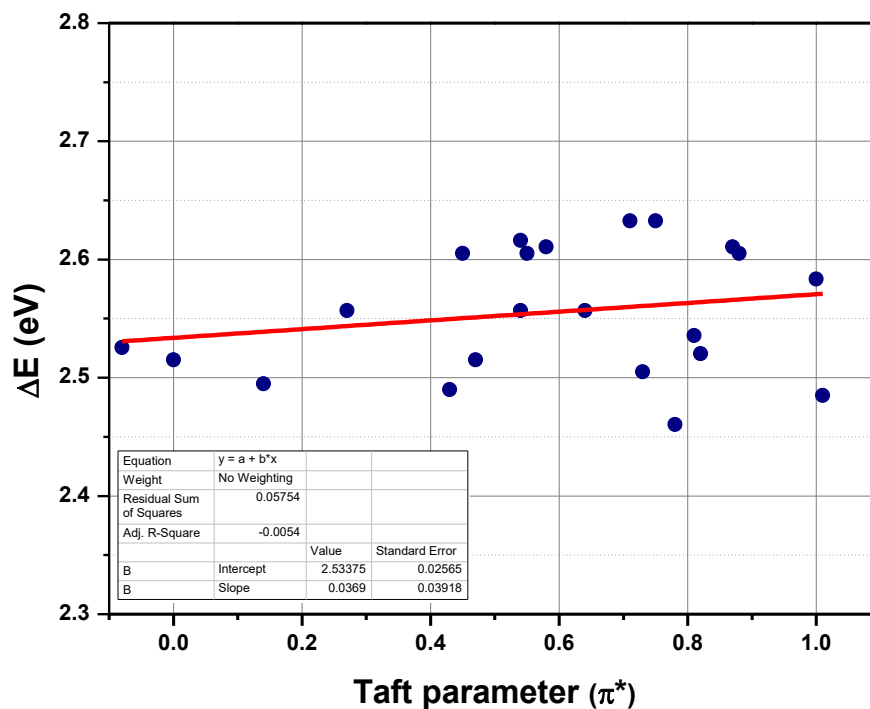

$$y = 0.0369 x + 2.53375$$

$$R^2 = -0.0054$$

Figure S46. **Dye 12**

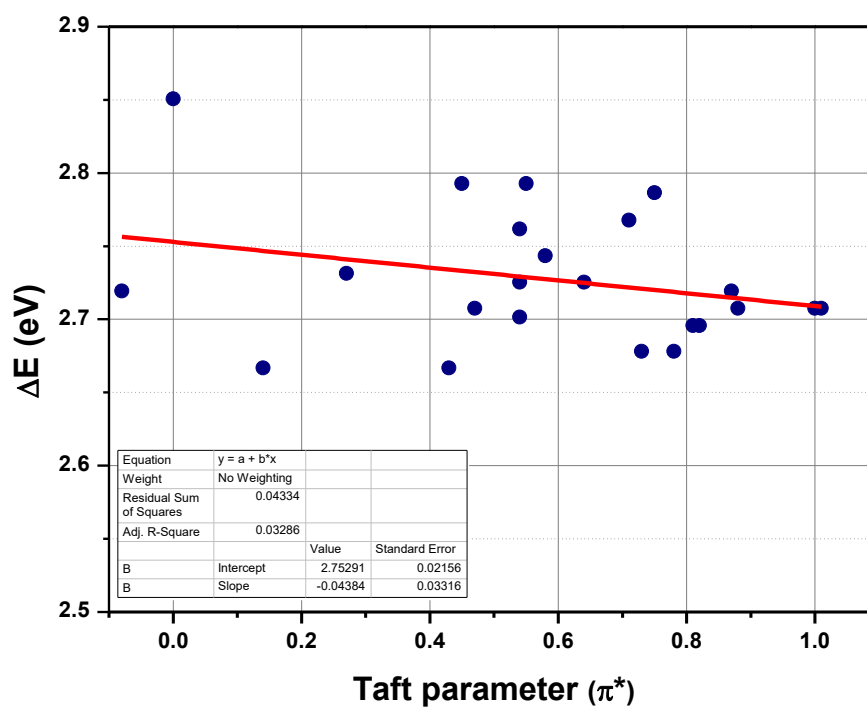

$$y = 0.04384 x + 2.75291$$

$$R^2 = 0.03286$$

Figure S47. **Dye 13**

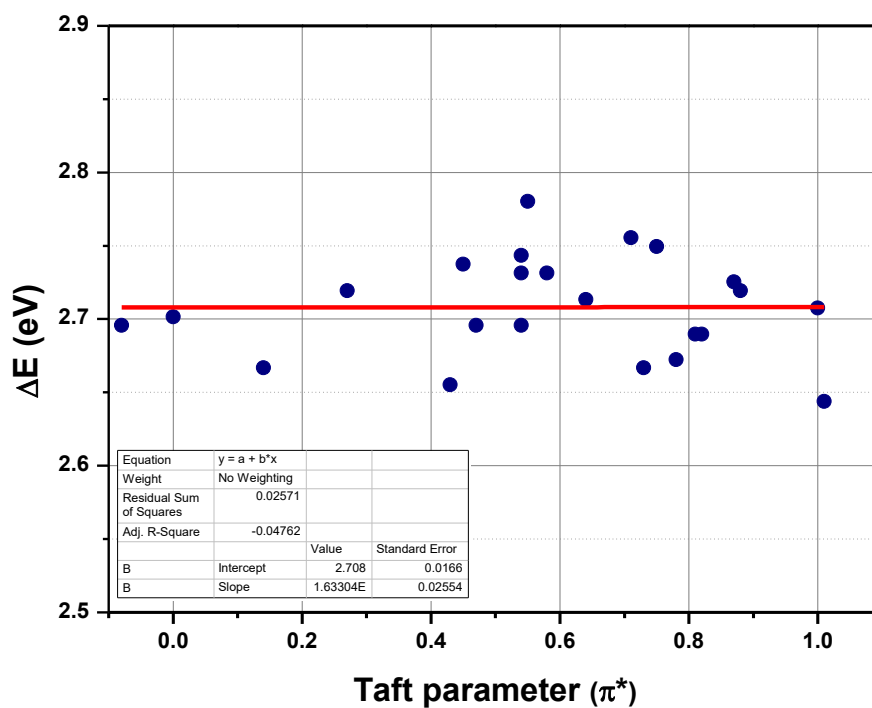

$$y = 0.1633 x + 2.708$$

$$R^2 = -0.0476$$

Figure S48. **Dye 14**

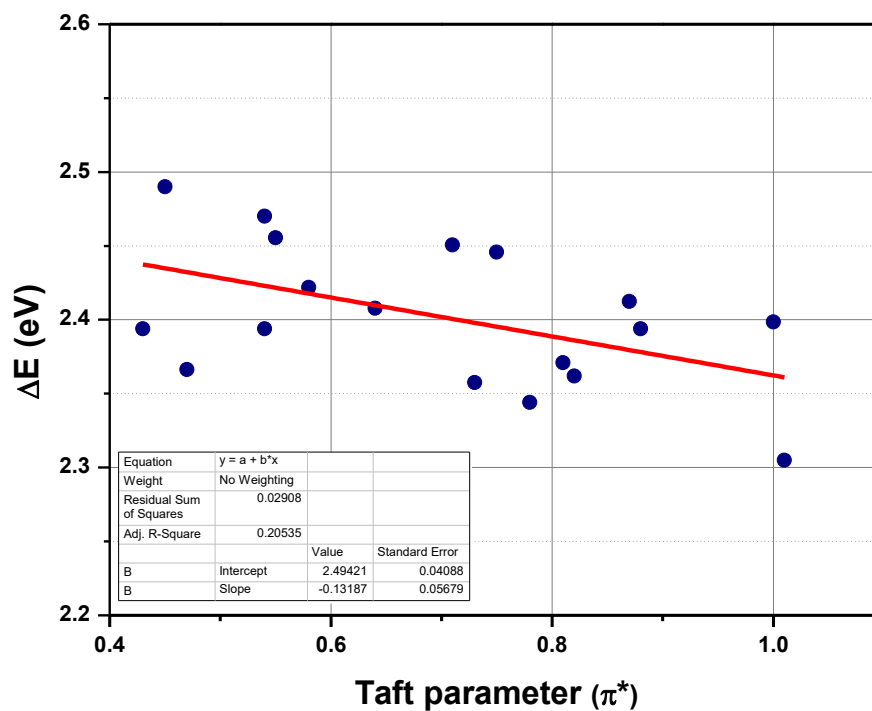

$$y = -0.13187 x + 2.49421$$

$$R^2 = 0.205$$

Figure S49. **Dye 15**

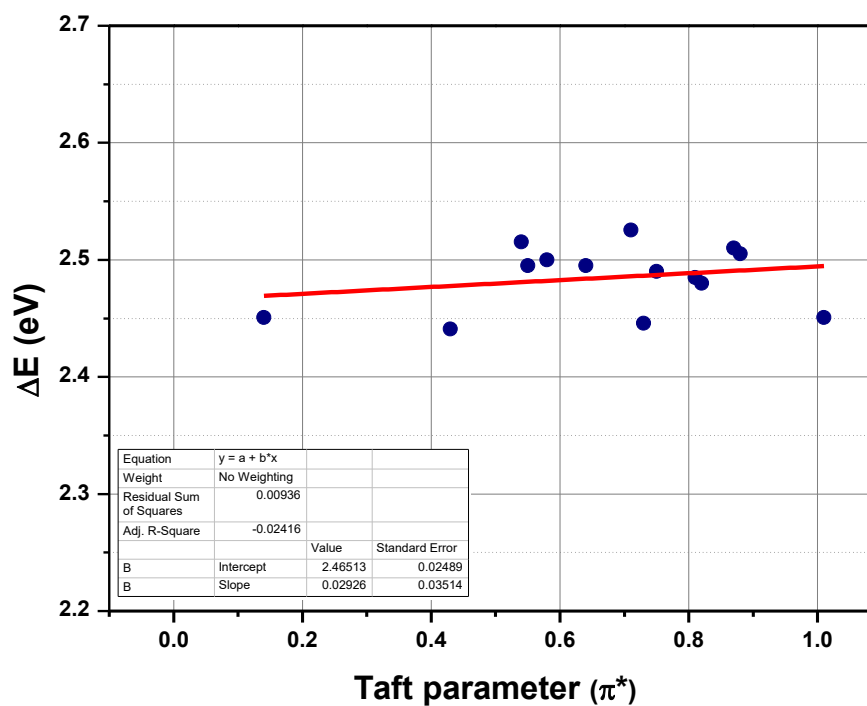

$$y = -0.02926 x + 2.46513$$

$$R^2 = -0.0242$$

**Position of the absorption maxima of PP1-PP15 in twenty-three solvents of different polarities vs. the Catalan solvent polarity/polarizability (SPP) scale and the Catalan solvent dipolarity (SdP) scale**

**Figure S50. Dye 1**

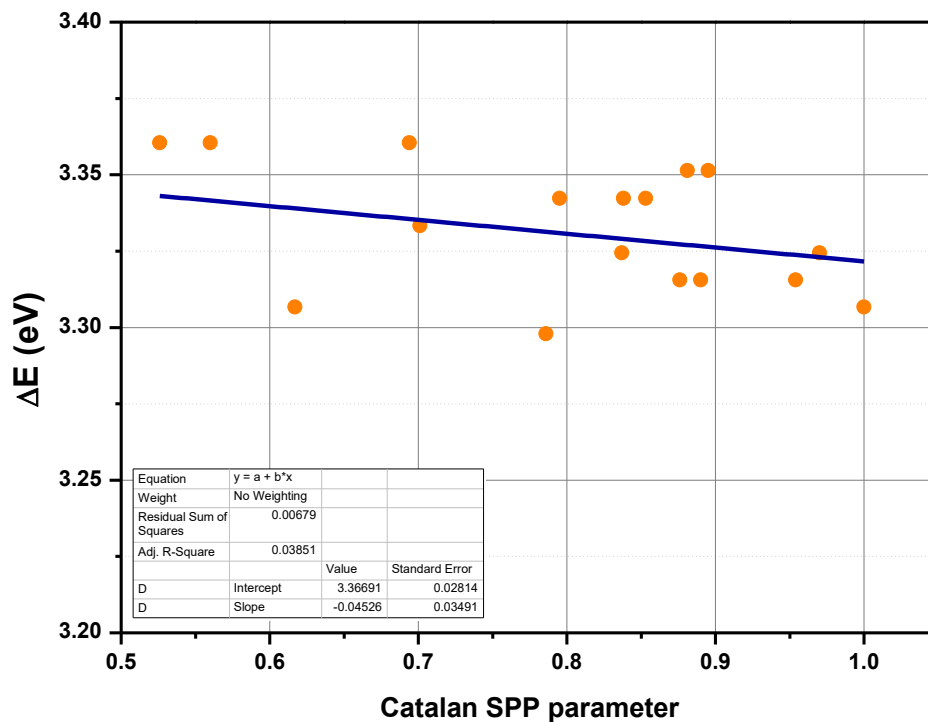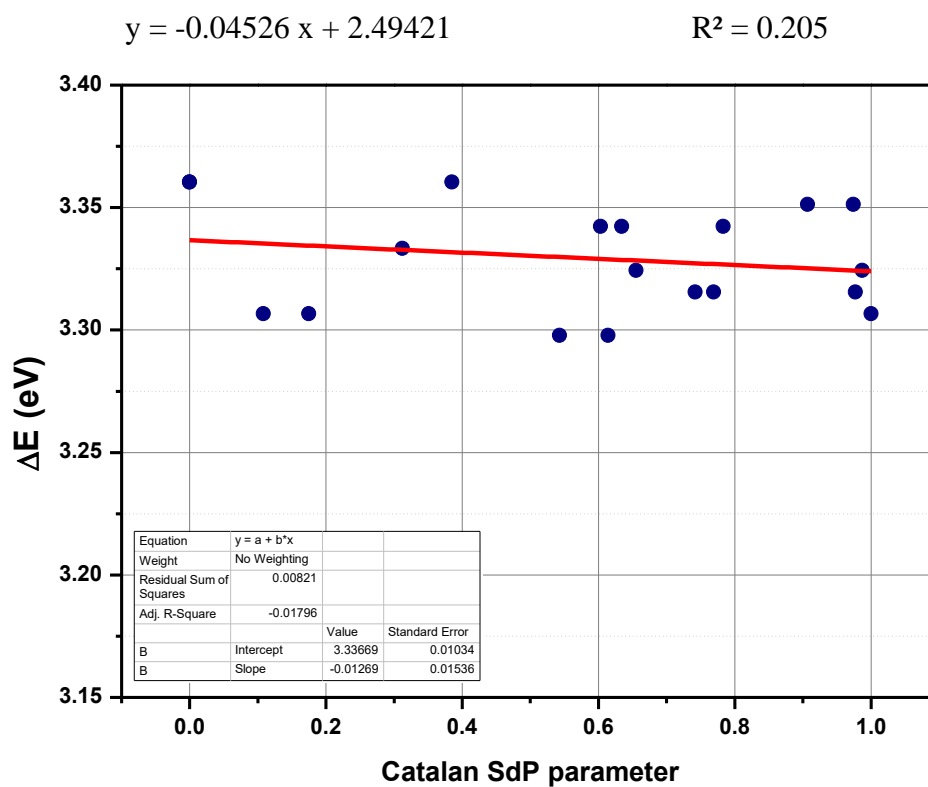

$y = -0.01269 x + 3.33669$

$R^2 = -0.018$

Figure S51. **Dye2**

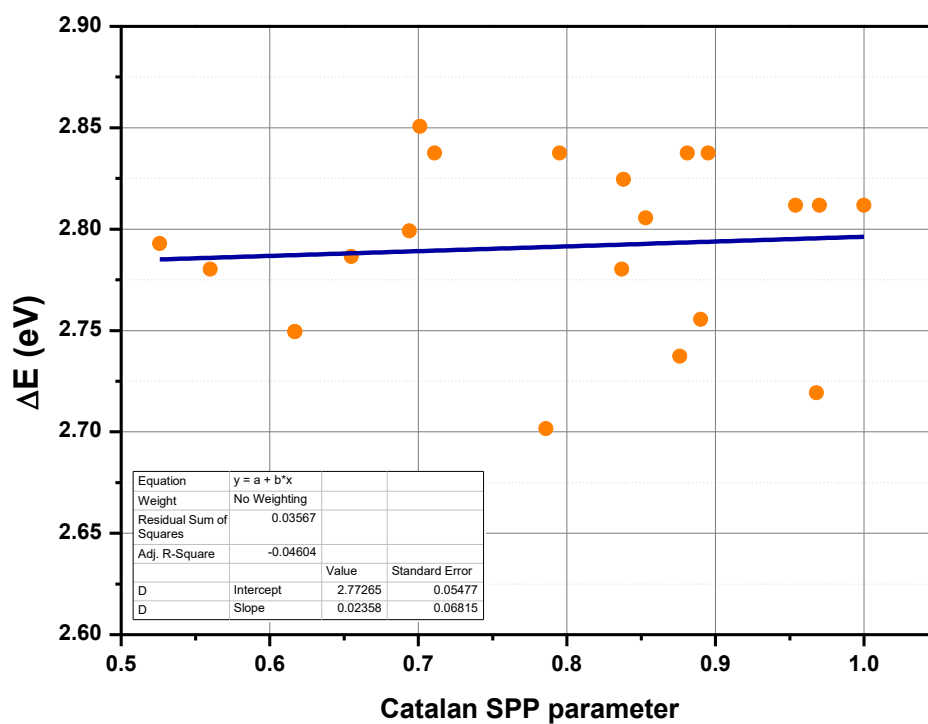

$$y = 0.02358 x + 2.77265$$

$$R^2 = -0.046$$

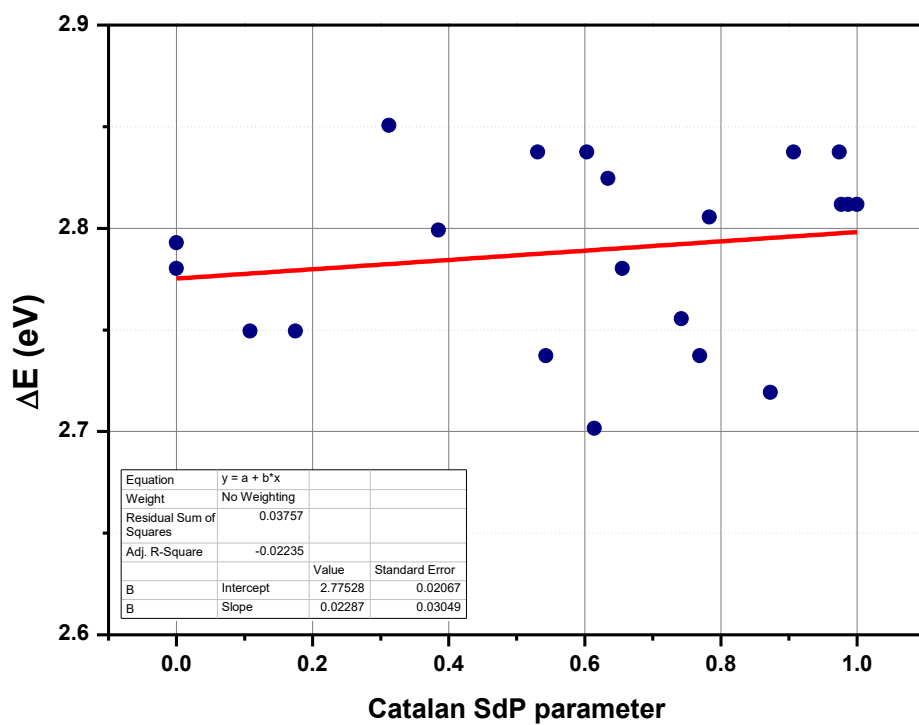

$$y = 0.02287 x + 2.77528$$

$$R^2 = -0.022$$

Figure S52. **Dye 3**

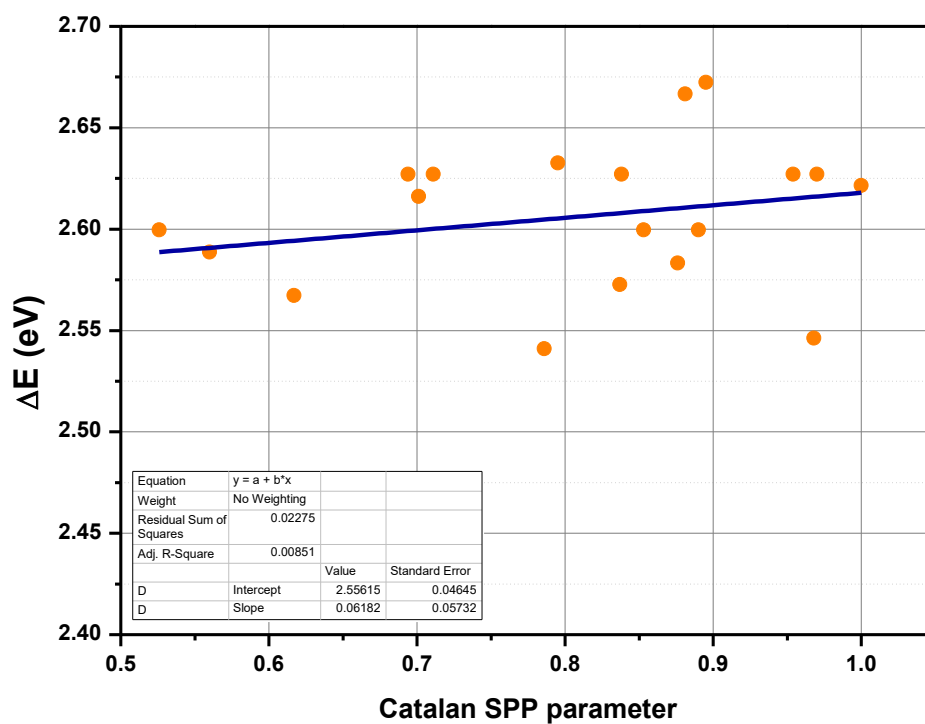

$$y = 0.06182 x + 2.55615$$

$$R^2 = -0.00851$$

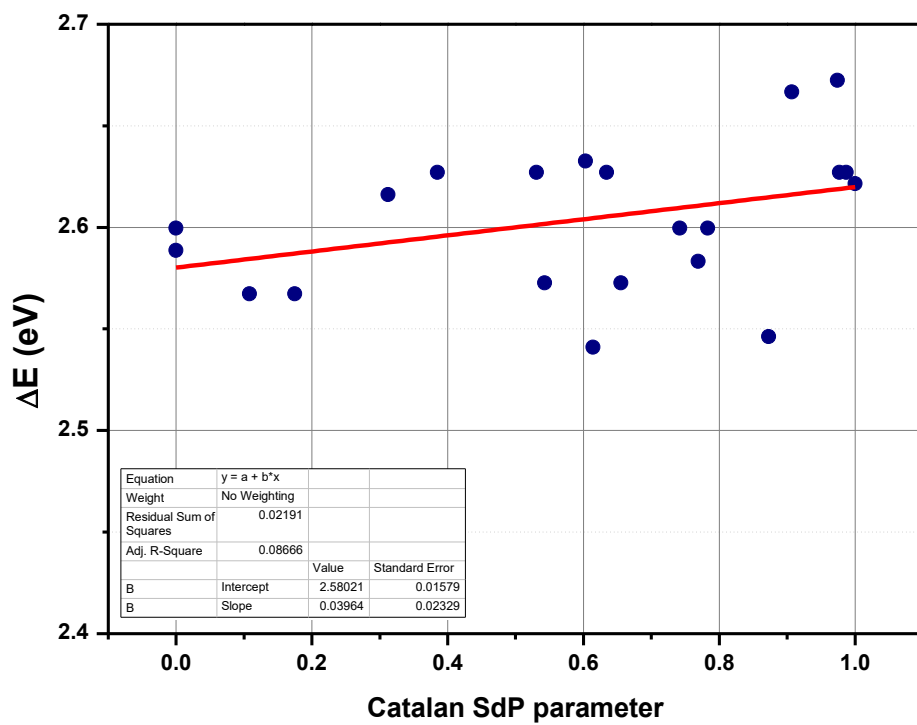

$$y = 0.03964 x + 2.58021$$

$$R^2 = 0.087$$

Figure S53. **Dye 5**

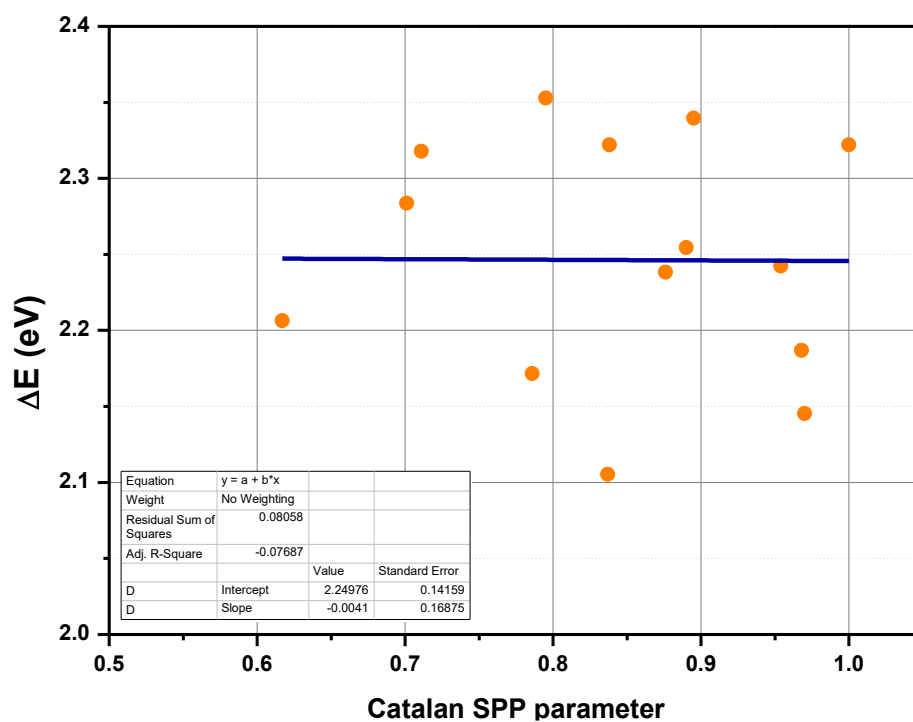

$$y = -0.0041 x + 2.24976$$

$$R^2 = -0.077$$

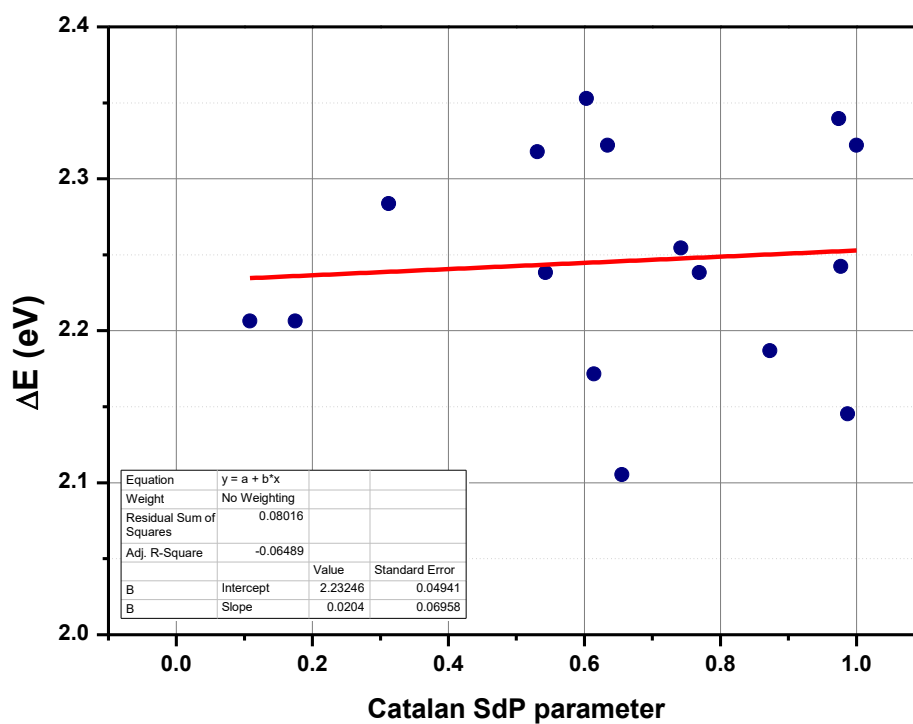

$$y = 0.0204 x + 2.23246$$

$$R^2 = -0.065$$

Figure S54. **Dye 6**

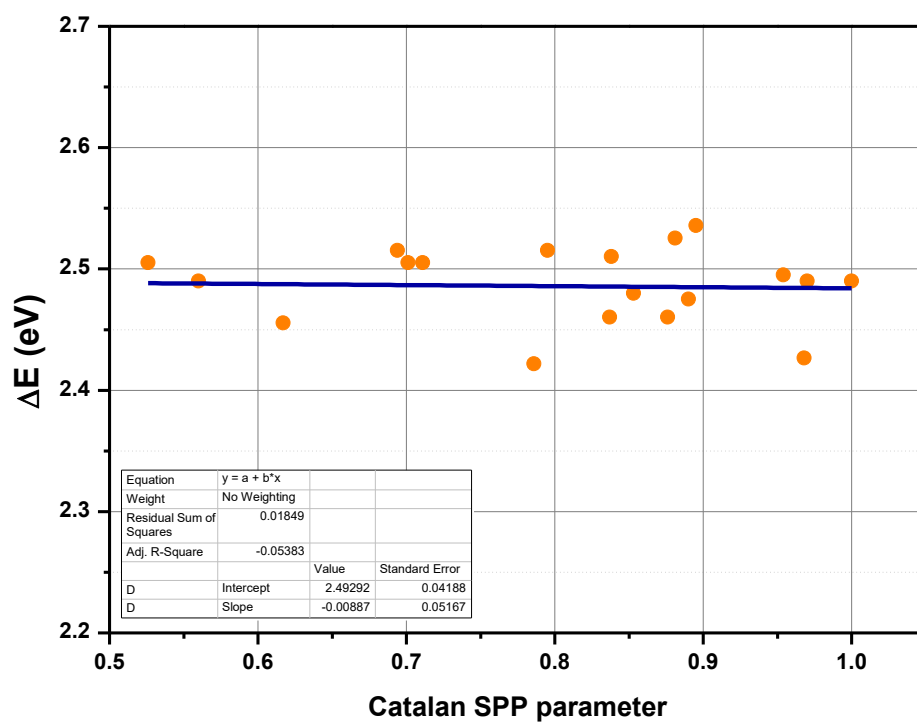

$$y = -0.00887x + 2.49292$$

$$R^2 = -0.054$$

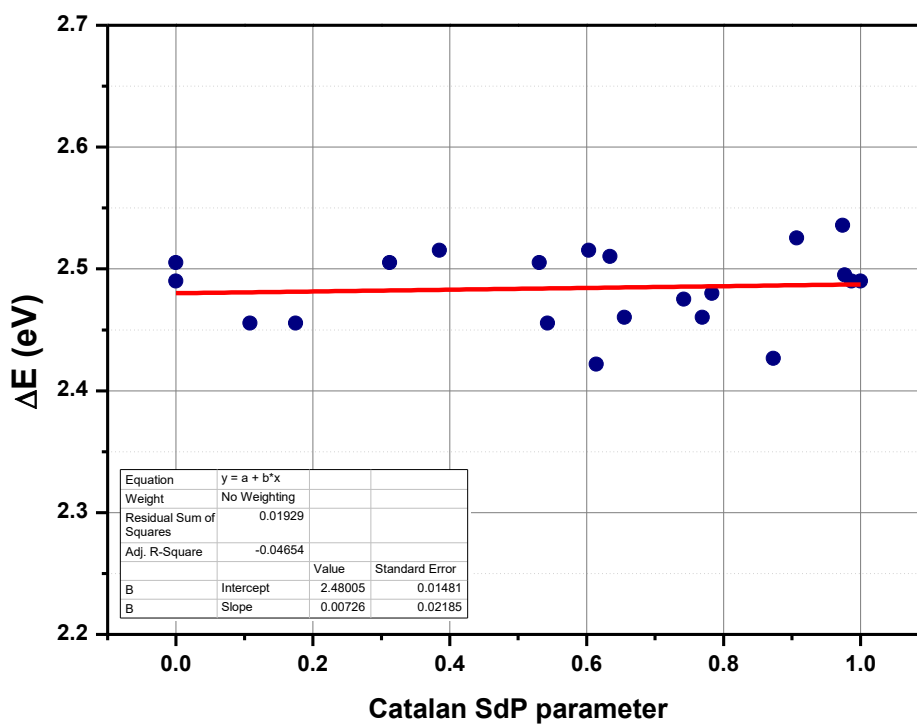

$$y = 0.00726x + 2.48005$$

$$R^2 = -0.046$$



Figure S55. **Dye 8**

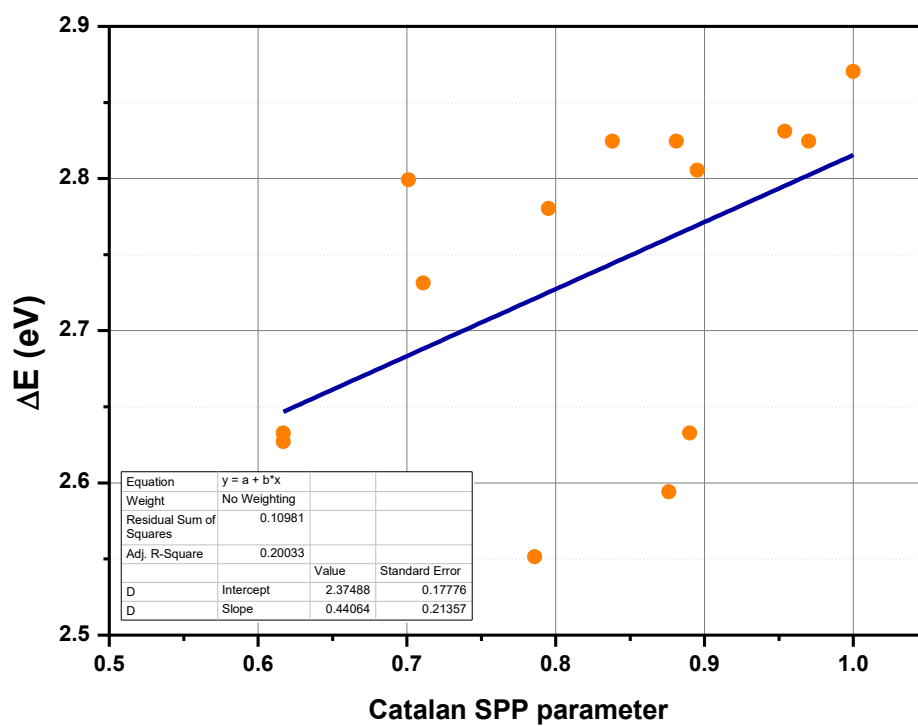

$$y = 0.44064 x + 2.37488$$

$$R^2 = 0.2003$$

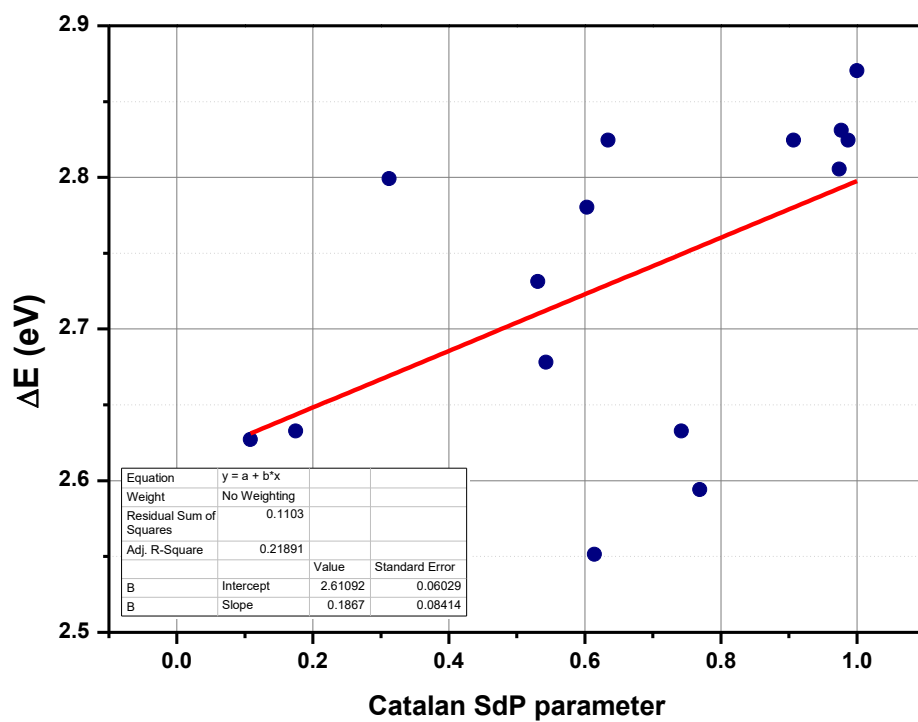

$$y = 0.1867 x + 2.61092$$

$$R^2 = 0.2189$$

Figure S56. **Dye 9**

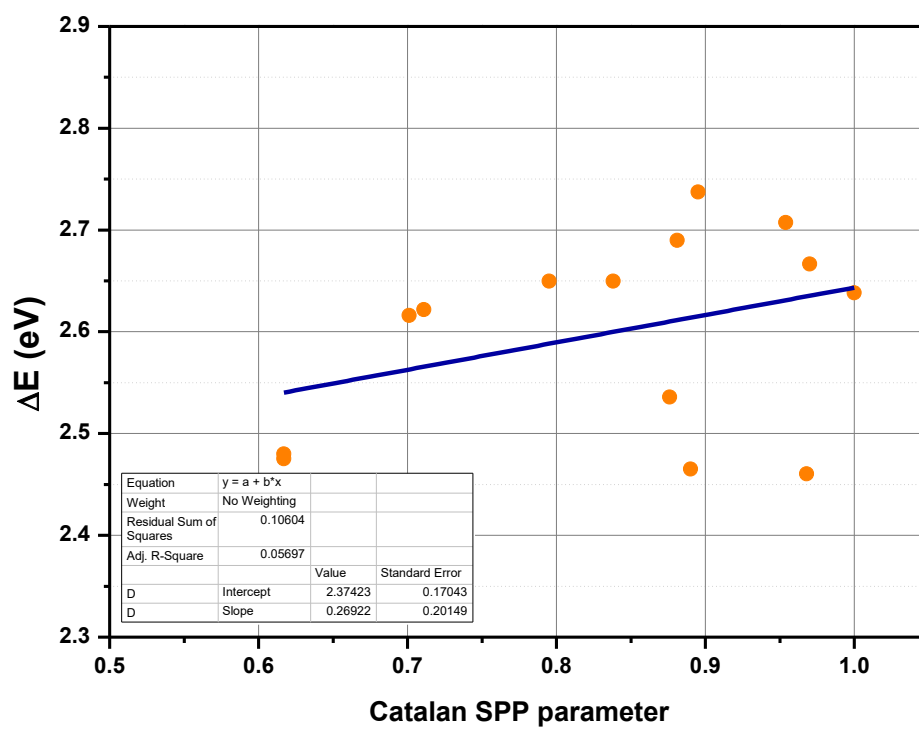

$$y = 0.26922 x + 2.37423$$

$$R^2 = 0.0570$$

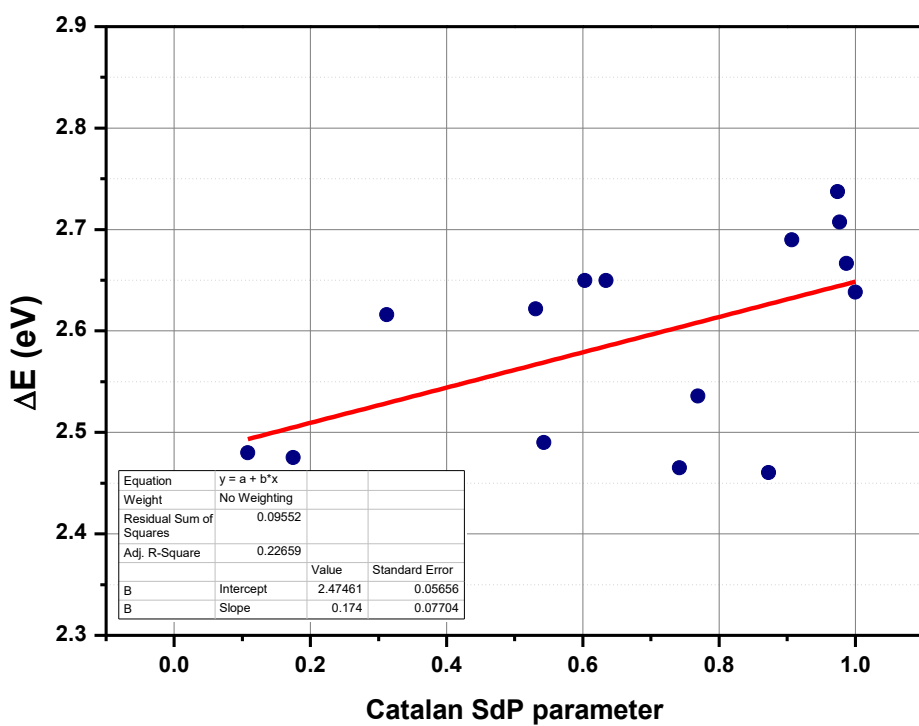

$$y = 0.174 x + 2.4746$$

$$R^2 = 0.2266$$

Figure S57. **Dye 10**

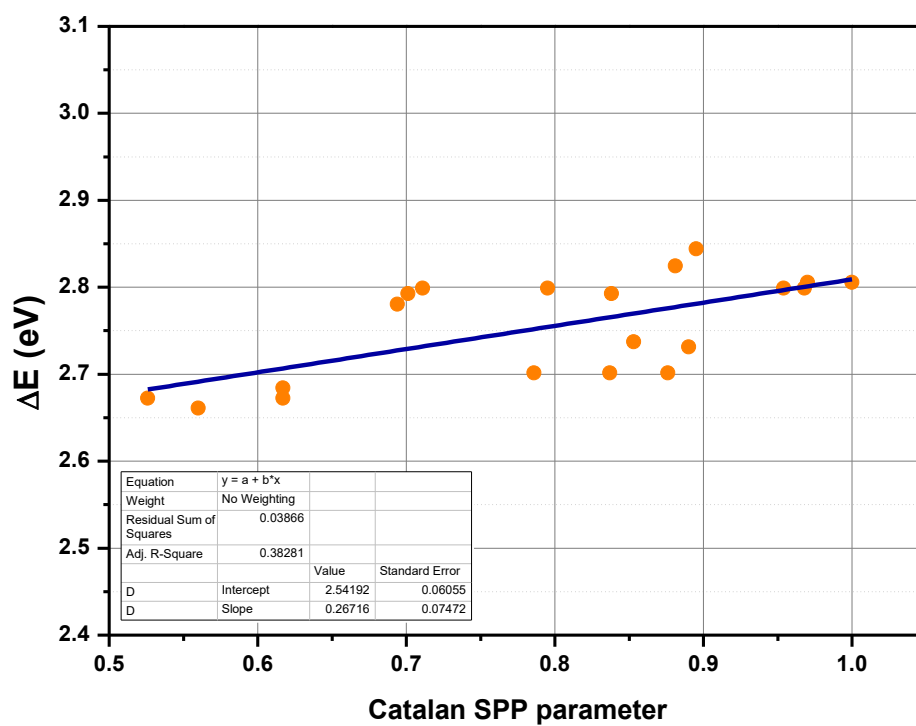

$$y = 0.26716 x + 2.5419$$

$$R^2 = 0.3828$$

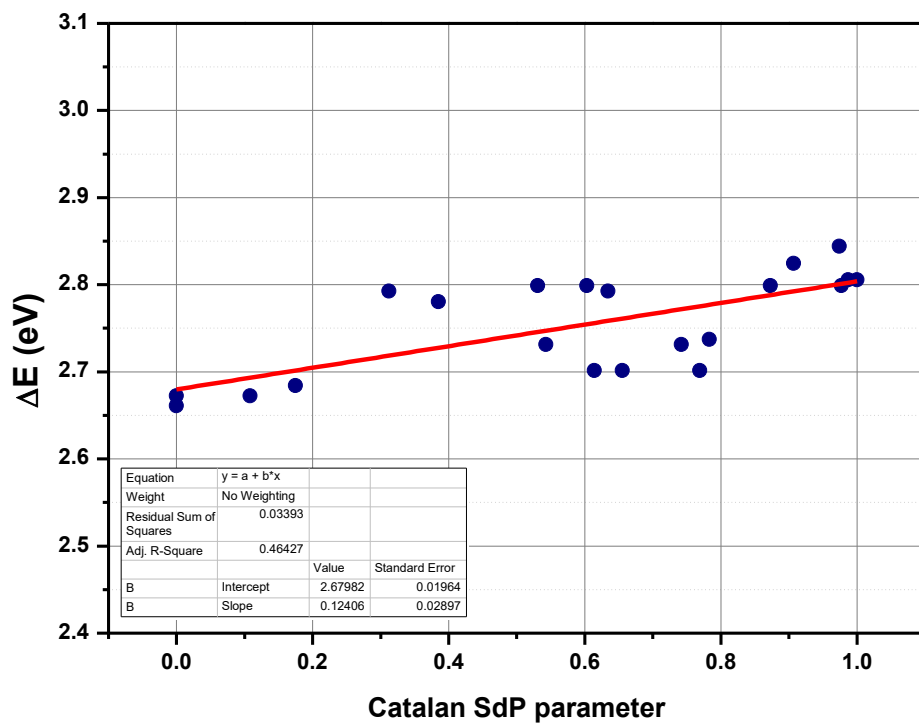

$$y = 0.1241 x + 2.6798$$

$$R^2 = 0.4643$$

Figure S58. **Dye 11**

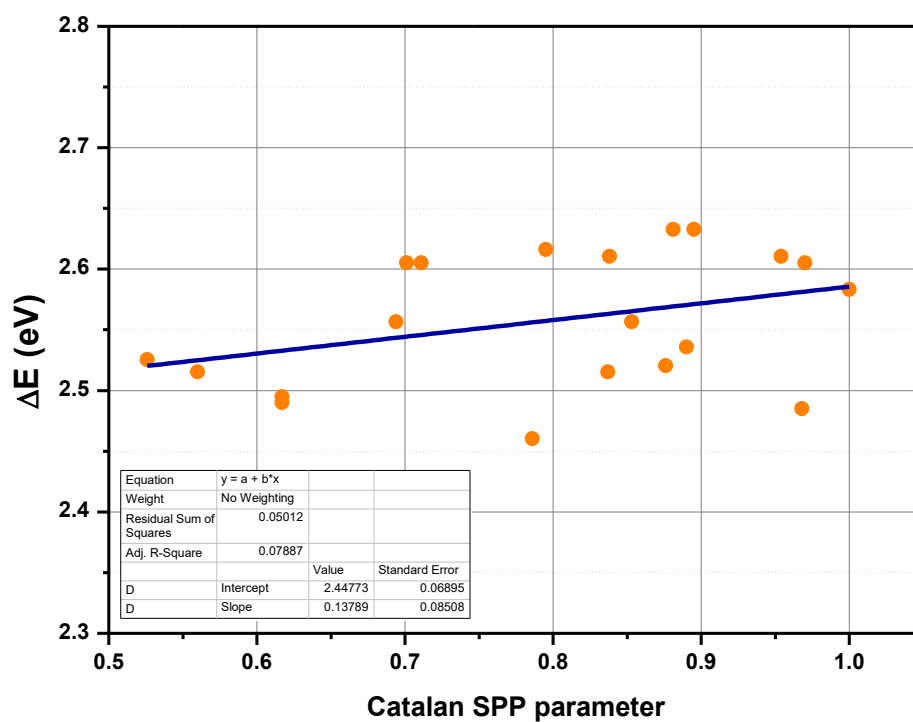

$$y = 0.1379 x + 2.4477$$

$$R^2 = 0.0789$$

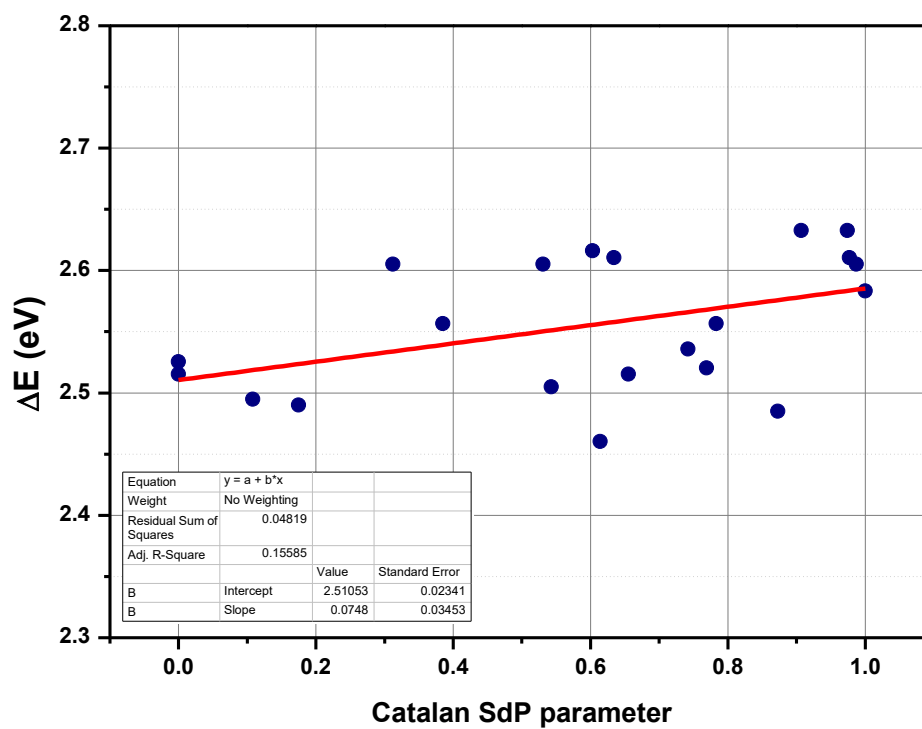

$$y = 0.0748 x + 2.5105$$

$$R^2 = 0.1558$$

Figure S59. **Dye 12**

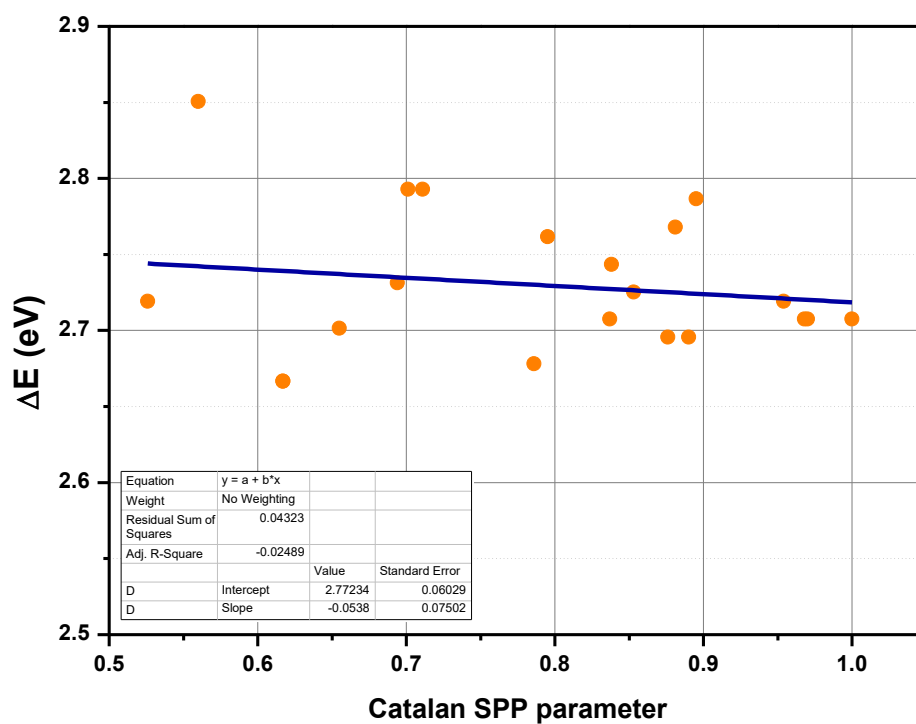

$$y = -0.0538 x + 2.7723$$

$$R^2 = -0.0249$$

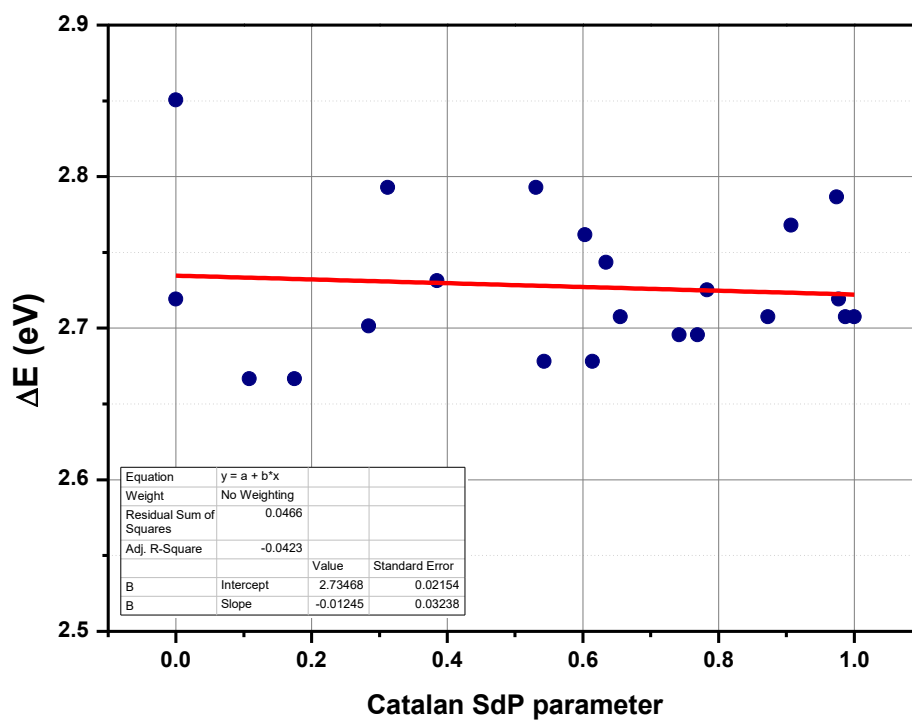

$$y = -0.01245 x + 2.7347$$

$$R^2 = -0.0423$$

Figure S60. **Dye 13**

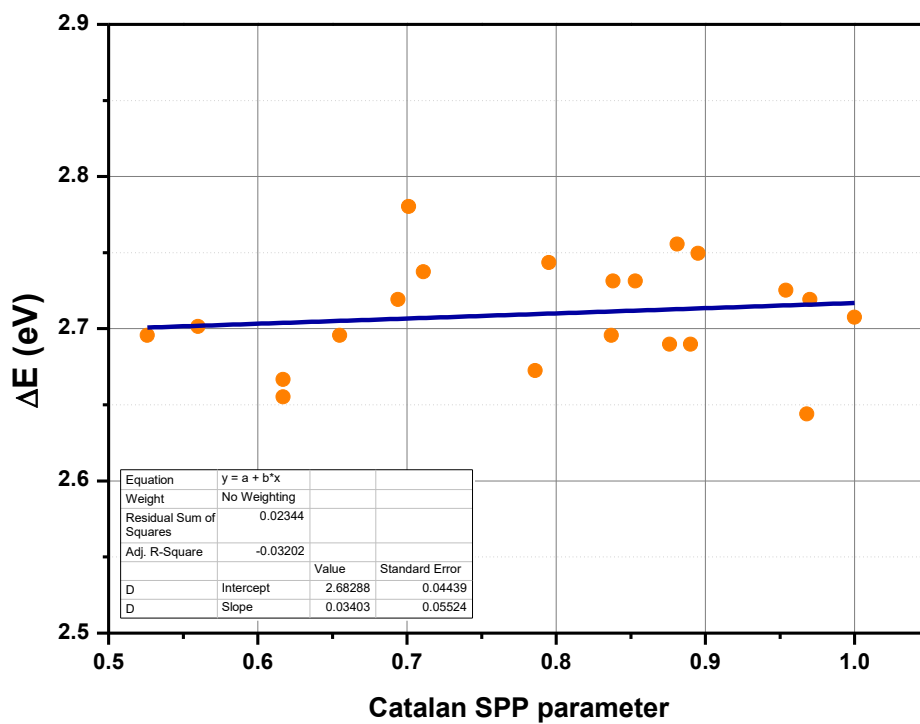

$$y = 0.03403 x + 2.6829$$

$$R^2 = -0.032$$

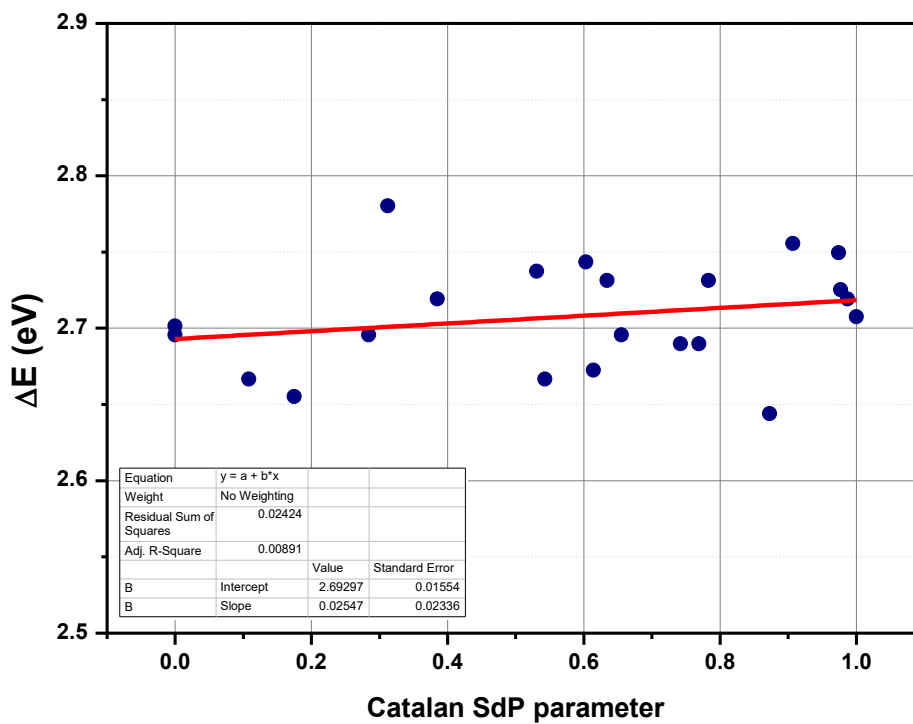

$$y = 0.02547 x + 2.69297$$

$$R^2 = 0.0089$$

Figure S61. **Dye 14**

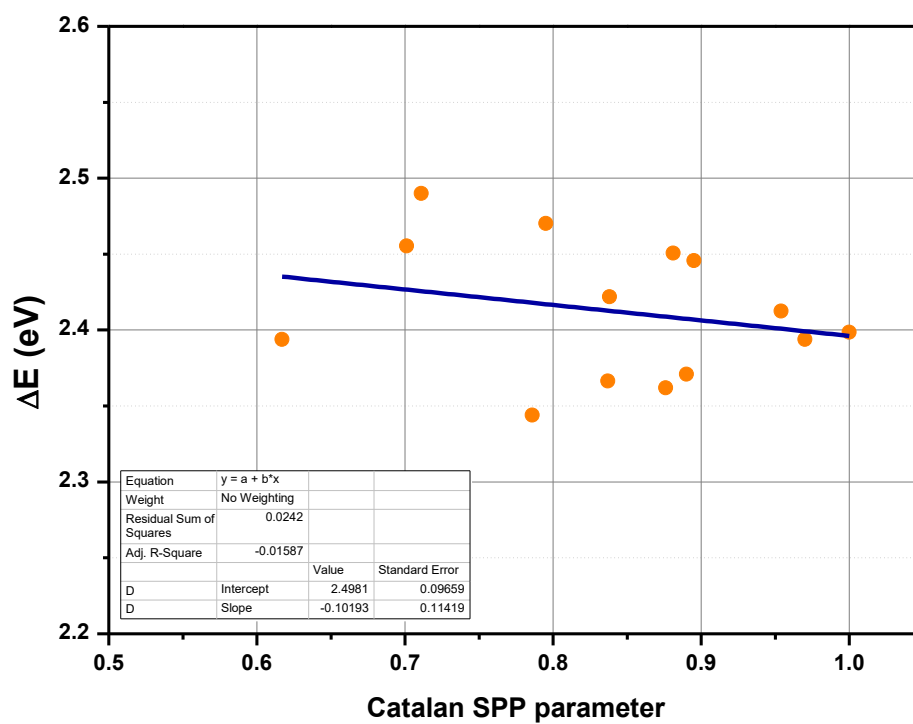

$$y = -0.10193 x + 2.4981$$

$$R^2 = -0.016$$

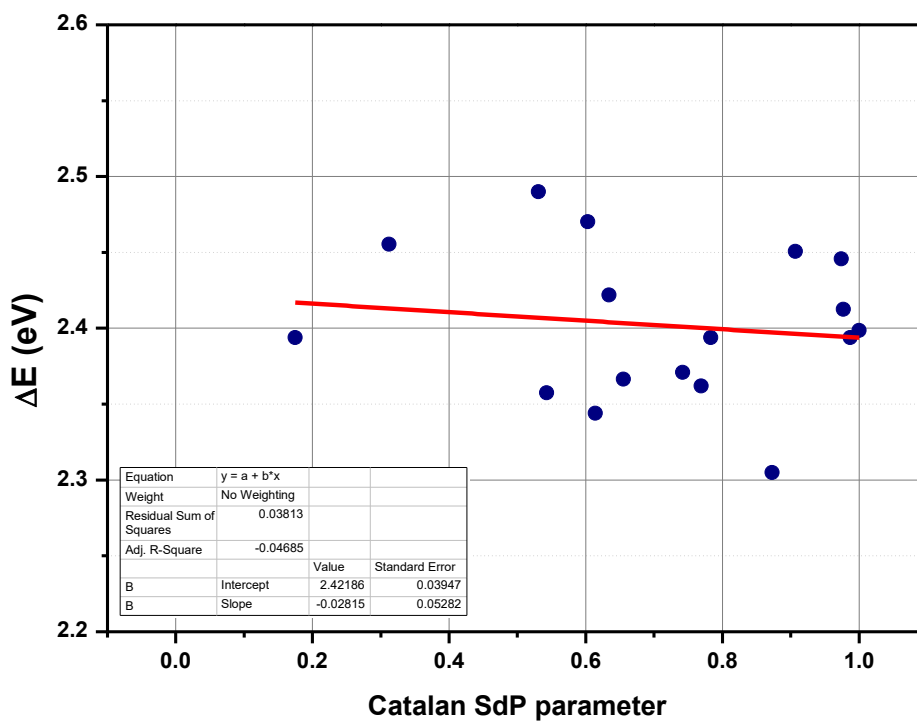

$$y = -0.02815 x + 2.4219$$

$$R^2 = -0.047$$

Figure S62. **Dye 15**

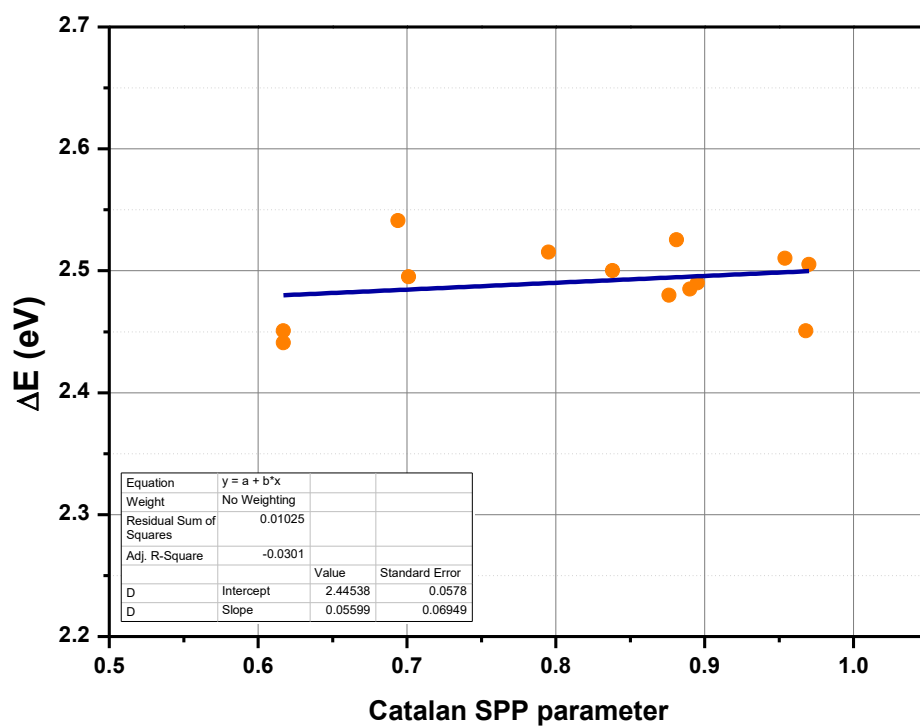

$$y = 0.05599 x + 2.44538$$

$$R^2 = -0.0301$$

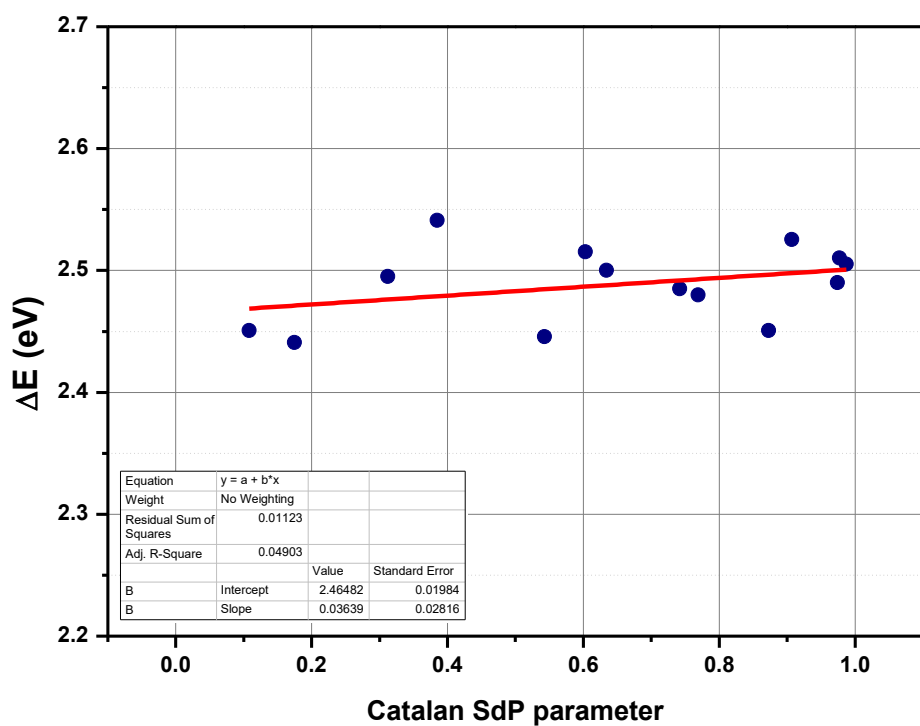

$$y = 0.03639 x + 2.46482$$

$$R^2 = 0.04903$$



**Table S1.** Summary of the optical properties of **Dye 1- Dye 8** in twenty-three solvents, values of the Kamlet and Taft parameters  $\pi^*$  and values of the Catalan solvent polarizability (SP), solvent dipolarity (SdP) and solvent polarity/polarizability (SPP) parameters

| compounds          | $\pi^*$ <sup>1</sup> | SP    | SdP   | SPP   | Dye1 | Dye 2 | Dye 3 | Dye 4 | Dye 5 | Dye 6 | Dye 7 | Dye 8 |
|--------------------|----------------------|-------|-------|-------|------|-------|-------|-------|-------|-------|-------|-------|
| acetone            | 0.71                 | 0.651 | 0.907 | 0.881 | 370  | 437   | 465   | -     | -     | 491   | -     | 439   |
| acetonitrile       | 0.75                 | 0.645 | 0.974 | 0.895 | 370  | 437   | 464   | -     | 530   | 489   | -     | 442   |
| AcOEt              | 0.54                 | 0.656 | 0.603 | 0.795 | 371  | 437   | 471   | 516   | 527   | 493   | -     | 446   |
| anisole            | 0.73                 | 0.82  | 0.543 | 0.854 | 376  | 453   | 482   | 537   | 554   | 505   | 565   | 463   |
| butanol            | 0.47                 | 0.674 | 0.655 | 0.837 | 373  | 446   | 482   | -     | 589   | 504   | -     | -     |
| chloroform         | 0.78                 | 0.783 | 0.614 | 0.786 | 376  | 459   | 488   | 544   | 571   | 512   | 580   | 486   |
| cyclohexane        | 0.00                 | 0.683 | 0     | 0.557 | 369  | 446   | 479   | -     | -     | 498   | -     | -     |
| 1,2-dichloroethane | 0.81                 | 0.771 | 0.742 | 0.890 | 374  | 450   | 477   | 531   | 550   | 501   | 562   | 471   |
| dichloromethane    | 0.82                 | 0.761 | 0.769 | 0.876 | 374  | 453   | 480   | 533   | 554   | 504   | -     | 478   |
| diethyl carbonate  | 0.45                 | 0.653 | 0.531 | 0.711 | -    | 437   | 472   | 520   | 535   | 495   | -     | 454   |
| diethyl ether      | 0.27                 | 0.617 | 0.385 | 0.694 | 369  | 443   | 472   | -     | -     | 493   | -     | -     |
| diglyme            | 0.64                 | -     | -     | 0.777 | 373  | 440   | 474   | 525   | 542   | 497   | 551   | 445   |
| 1,4-dioxane        | 0.55                 | 0.737 | 0.312 | 0.701 | 372  | 435   | 474   | 523   | 543   | 495   | 549   | 443   |
| dimethylacetamide  | 0.88                 | 0.763 | 0.987 | 0.970 | 373  | 441   | 472   | -     | 578   | 498   | -     | 439   |
| DMF                | 0.87                 | 0.759 | 0.977 | 0.954 | 374  | 441   | 472   | -     | 553   | 497   | -     | 438   |
| DMSO               | 1.00                 | 0.83  | 1     | 1.000 | 375  | 441   | 473   | -     | 534   | 498   | -     | 432   |
| ethanol            | 0.54                 | 0.633 | 0.783 | 0.853 | 371  | 442   | 477   | -     | -     | 500   | -     | -     |
| heptane            | -0.08                | 0.635 | 0     | 0.526 | 369  | 444   | 477   | -     | -     | 495   | -     | -     |
| nitrobenzene       | 1.01                 | 0.891 | 0.873 | 0.968 | -    | 456   | 487   | -     | 567   | 511   | 565   | -     |
| THF                | 0.58                 | 0.714 | 0.634 | 0.838 | 371  | 439   | 472   | 520   | 534   | 494   | -     | 439   |
| toluene            | 0.54                 | 0.66  | 0.108 | 0.617 | 375  | 451   | 483   | 542   | 562   | 505   | 566   | 472   |
| triethylamine      | 0.14                 | 0.782 | 0.284 | 0.655 | 370  | 445   | -     | -     | -     | -     | -     | 462   |
| <i>p</i> -xylene   | 0.43                 | 0.778 | 0.175 | 0.617 | 375  | 451   | 483   | 540   | 562   | 505   | 565   | 471   |

<sup>1</sup> Kamlet and Taft parameters <sup>2</sup> Position of the ICT bands are given in nm.

**Table S2.** Summary of the optical properties of **Dye 9- Dye 15** in twenty-three solvents, values of the Kamlet and Taft parameters  $\pi^*$  and values of the Catalan solvent polarizability (SP), solvent dipolarity (SdP) and solvent polarity/polarizability (SPP) parameters

| compounds          | $\pi^*$ <sup>1</sup> | SP    | SdP   | SPP   | Dye 9 | Dye 10 | Dye 11 | Dye 12 | Dye 13 | Dye 14 | Dye 15 |
|--------------------|----------------------|-------|-------|-------|-------|--------|--------|--------|--------|--------|--------|
| acetone            | 0.71                 | 0.651 | 0.907 | 0.881 | 461   | 439    | 471    | 448    | 450    | 506    | 491    |
| acetonitrile       | 0.75                 | 0.645 | 0.974 | 0.895 | 453   | 436    | 471    | 445    | 451    | 507    | 498    |
| AcOEt              | 0.54                 | 0.656 | 0.603 | 0.795 | 468   | 443    | 474    | 449    | 452    | 502    | 493    |
| anisole            | 0.73                 | 0.82  | 0.543 | 0.854 | 498   | 454    | 495    | 463    | 465    | 526    | 507    |
| butanol            | 0.47                 | 0.674 | 0.655 | 0.837 | -     | 459    | 493    | 458    | 460    | 524    | -      |
| chloroform         | 0.78                 | 0.783 | 0.614 | 0.786 | -     | 459    | 504    | 463    | 464    | 529    | -      |
| cyclohexane        | 0.00                 | 0.683 | 0     | 0.557 | -     | 466    | 493    | 435    | 459    | -      | -      |
| 1,2-dichloroethane | 0.81                 | 0.771 | 0.742 | 0.890 | 503   | 454    | 489    | 460    | 461    | 523    | 499    |
| dichloromethane    | 0.82                 | 0.761 | 0.769 | 0.876 | 489   | 459    | 492    | 460    | 461    | 525    | 500    |
| diethyl carbonate  | 0.45                 | 0.653 | 0.531 | 0.711 | 473   | 443    | 476    | 444    | 453    | 498    |        |
| diethyl ether      | 0.27                 | 0.617 | 0.385 | 0.694 | -     | 446    | 485    | 454    | 456    | -      | 488    |
| diglyme            | 0.64                 |       |       | 0.777 | 477   | 448    | 485    | 455    | 457    | 515    | 497    |
| 1,4-dioxane        | 0.55                 | 0.737 | 0.312 | 0.701 | 474   | 444    | 476    | 444    | 446    | 505    | 497    |
| dimethylacetamide  | 0.88                 | 0.763 | 0.987 | 0.970 | 465   | 442    | 476    | 458    | 456    | 518    | 495    |
| dimethylformamide  | 0.87                 | 0.759 | 0.977 | 0.954 | 458   | 443    | 475    | 456    | 455    | 514    | 494    |
| DMSO               | 1.00                 | 0.83  | 1     | 1.000 | 470   | 442    | 480    | 458    | 458    | 517    | -      |
| ethanol            | 0.54                 | 0.633 | 0.783 | 0.853 | -     | 453    | 485    | 455    | 454    | 518    | -      |
| heptane            | -0.08                | 0.635 | 0     | 0.526 | -     | 464    | 491    | 456    | 460    | -      | -      |
| nitrobenzene       | 1.01                 | 0.891 | 0.873 | 0.968 | 504   | 443    | 499    | 458    | 469    | 538    | 506    |
| THF                | 0.58                 | 0.714 | 0.634 | 0.838 | 468   | 444    | 475    | 452    | 454    | 512    | 496    |
| toluene            | 0.54                 | 0.66  | 0.108 | 0.617 | 500   | 464    | 497    | 465    | 465    | -      | 506    |
| triethylamine      | 0.14                 | 0.782 | 0.284 | 0.655 | 513   | 497    | -      | 459    | 460    | -      | -      |
| <i>p</i> -xylene   | 0.43                 | 0.778 | 0.175 | 0.617 | 501   | 462    | 498    | 465    | 467    | 518    | 508    |

<sup>1</sup> Kamlet and Taft parameters <sup>2</sup> Position of the ICT bands are given in nm.

### Results of the linear correlation analyses

The position of the UV/Vis absorption maxima with regard to the dipolarity/polarizability  $\pi^*$  can be interpreted using a simplified version of the Kamlet-Taft equation :

$$\nu_{\max} (\text{cm}^{-1}) = \nu_{\max,0} (\text{cm}^{-1}) + s\pi^*$$

**Table S3.** Solvent-independent correlation coefficient  $s$  of the Kamlet-Taft parameters  $\pi^*$

| Compounds     | $\nu_{\max,0}$ | $s$      | $R^2$   |
|---------------|----------------|----------|---------|
| <b>Dye 1</b>  | 3.35008        | -0.03692 | 0.22545 |
| <b>Dye 2</b>  | 2.7973         | -0.01227 | -0.0400 |
| <b>Dye 3</b>  | 2.59865        | 0.00997  | -0.0420 |
| <b>Dye 4</b>  | 2.33927        | 0.00117  | -0.1110 |
| <b>Dye 5</b>  | 2.24973        | -0.00211 | -0.0667 |
| <b>Dye 6</b>  | 2.49705        | 0.02078  | -0.0064 |
| <b>Dye 8</b>  | 2.64729        | 0.13459  | 0.014   |
| <b>Dye 9</b>  | 2.54281        | 0.0708   | -0.037  |
| <b>Dye 10</b> | 2.69011        | 0.11027  | 0.308   |
| <b>Dye 11</b> | 2.53375        | 0.0369   | -0.0054 |
| <b>Dye 12</b> | 2.75291        | 0.04384  | 0.03286 |
| <b>Dye 13</b> | 2.708          | 0.1633   | -0.0476 |
| <b>Dye 14</b> | 2.49421        | -0.13187 | 0.205   |
| <b>Dye 15</b> | 2.46513        | -0.02926 | -0.0242 |

The position of the UV/Vis absorption maxima with regard to the dipolarity/polarizability  $\pi^*$  can also be interpreted using a Catalan parameters, namely, the solvent dipolarity (SdP) and the solvent polarity/polarizability (SPP) using the following equations :

$$\nu_{\max} (\text{cm}^{-1}) = \nu_{\max,01} (\text{cm}^{-1}) + a \times \text{SdP}$$

$$\nu_{\max} (\text{cm}^{-1}) = \nu_{\max,02} (\text{cm}^{-1}) + b \times \text{SPP}$$

**Table S4.** Solvent-independent correlation coefficients *a* and *b* of the Catalan parameters SdP and SPP.

| Compounds     | $\nu_{\max,01}$ | <i>a</i> | $R^2$   | $\nu_{\max,02}$ | <i>b</i> | $R^2$    |
|---------------|-----------------|----------|---------|-----------------|----------|----------|
| <b>Dye 1</b>  | 3.33669         | -0.01269 | -0.018  | 2.49421         | -0.04526 | 0.205    |
| <b>Dye 2</b>  | 2.77528         | 0.02287  | -0.022  | 2.77265         | 0.02358  | -0.046   |
| <b>Dye 4</b>  | 2.58021         | 0.03964  | 0.087   | 2.55615         | 0.06182  | -0.00851 |
| <b>Dye 5</b>  | 2.23246         | 0.0204   | -0.065  | 2.24976         | -0.0041  | -0.077   |
| <b>Dye 6</b>  | 2.48005         | 0.00726  | -0.046  | 2.49292         | -0.0887  | -0.054   |
| <b>Dye 8</b>  | 2.61092         | 0.1867   | 0.2189  | 2.37488         | 0.44064  | 0.2003   |
| <b>Dye 9</b>  | 2.4746          | 0.174    | 0.2266  | 2.37423         | 0.26922  | 0.0570   |
| <b>Dye 10</b> | 2.6798          | 0.1241   | 0.4643  | 2.5419          | 0.26716  | 0.3828   |
| <b>Dye 11</b> | 2.5105          | 0.0748   | 0.1558  | 2.4477          | 0.1379   | 0.0789   |
| <b>Dye 12</b> | 2.7347          | -0.01245 | -0.0423 | 2.7723          | -0.0538  | -0.0249  |
| <b>Dye 13</b> | 2.69297         | 0.02547  | 0.0089  | 2.6829          | 0.03403  | -0.032   |
| <b>Dye 14</b> | 2.4219          | -0.02815 | -0.047  | 2.4981          | -0.10193 | -0.016   |
| <b>Dye 15</b> | 2.46482         | 0.03639  | 0.0490  | 2.44538         | 0.05599  | -0.0301  |

Optimized geometries and HOMO LUMO electronic distribution of all compounds

Figure S63. **Dye 1**

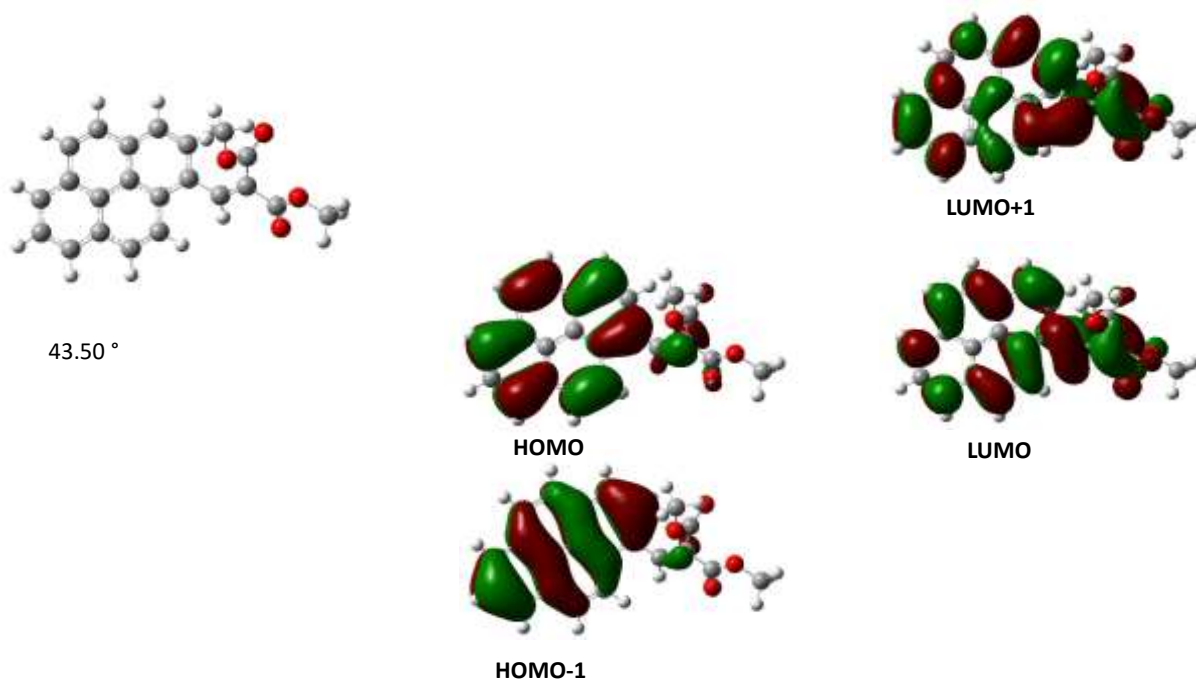

Figure S64. **Dye 2**

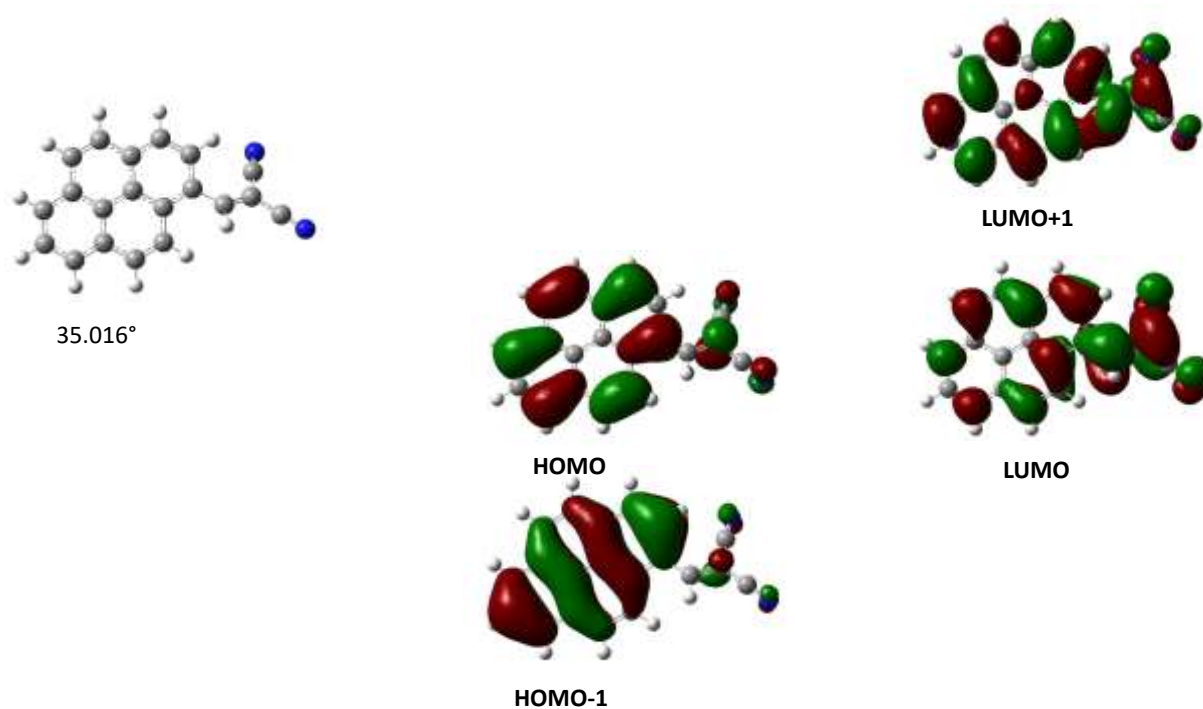

**Figure S65. Dye 3**

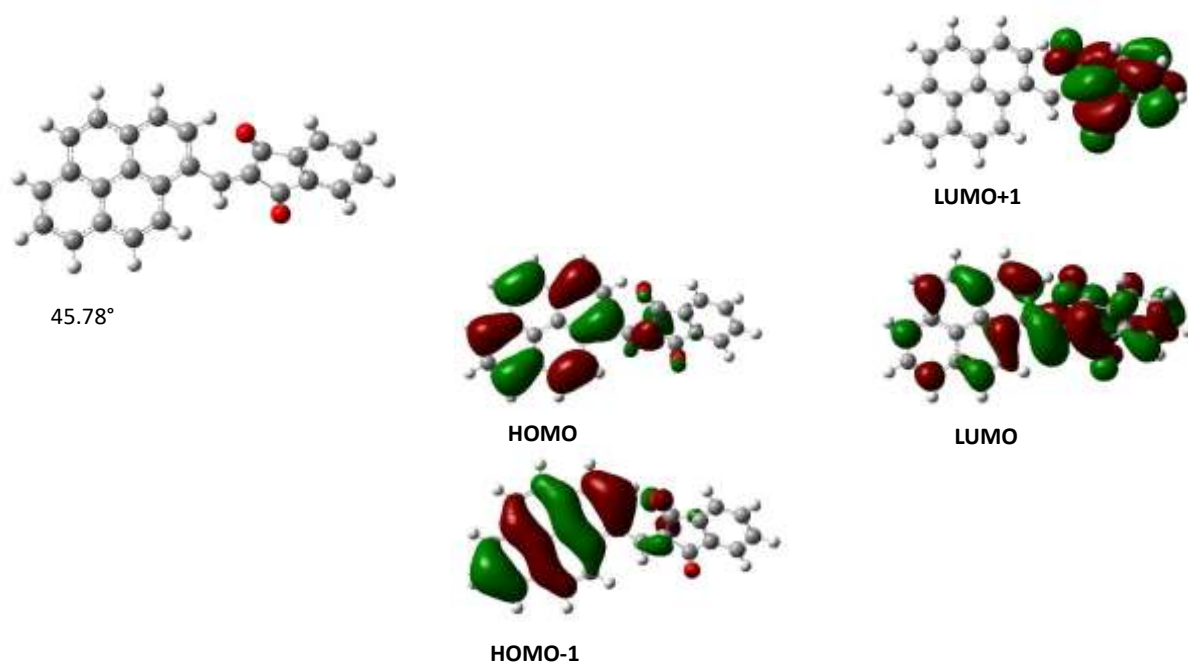

**Figure S66. Dye 4**

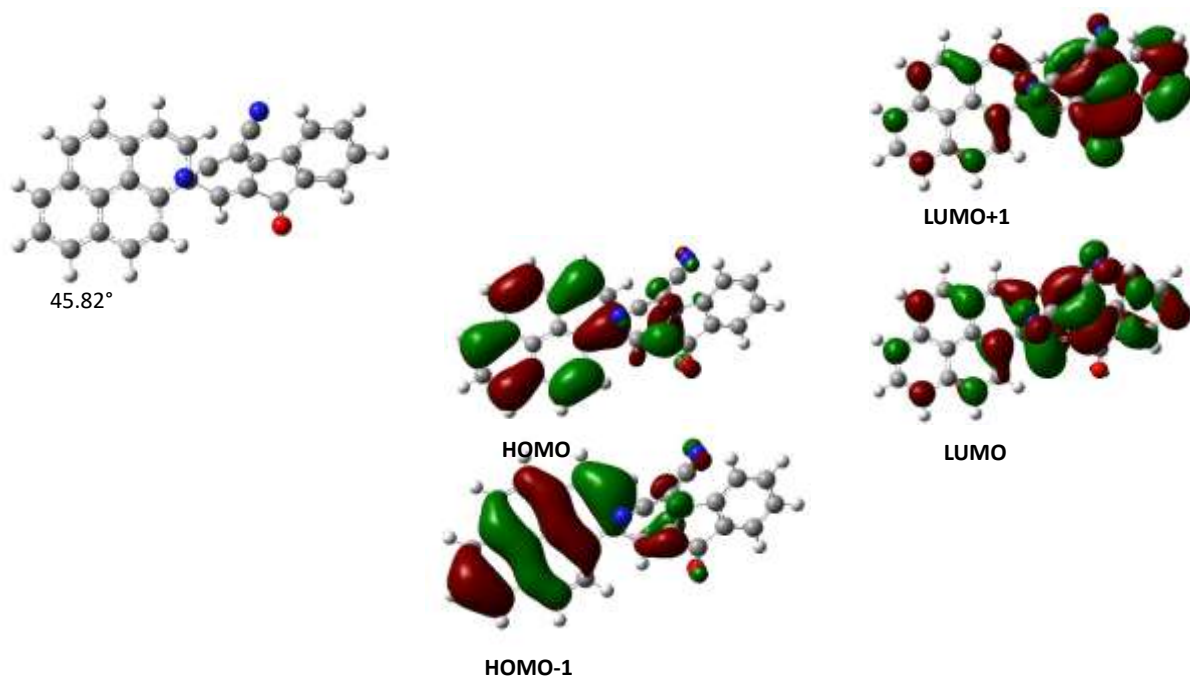

Figure S67. **Dye 5**

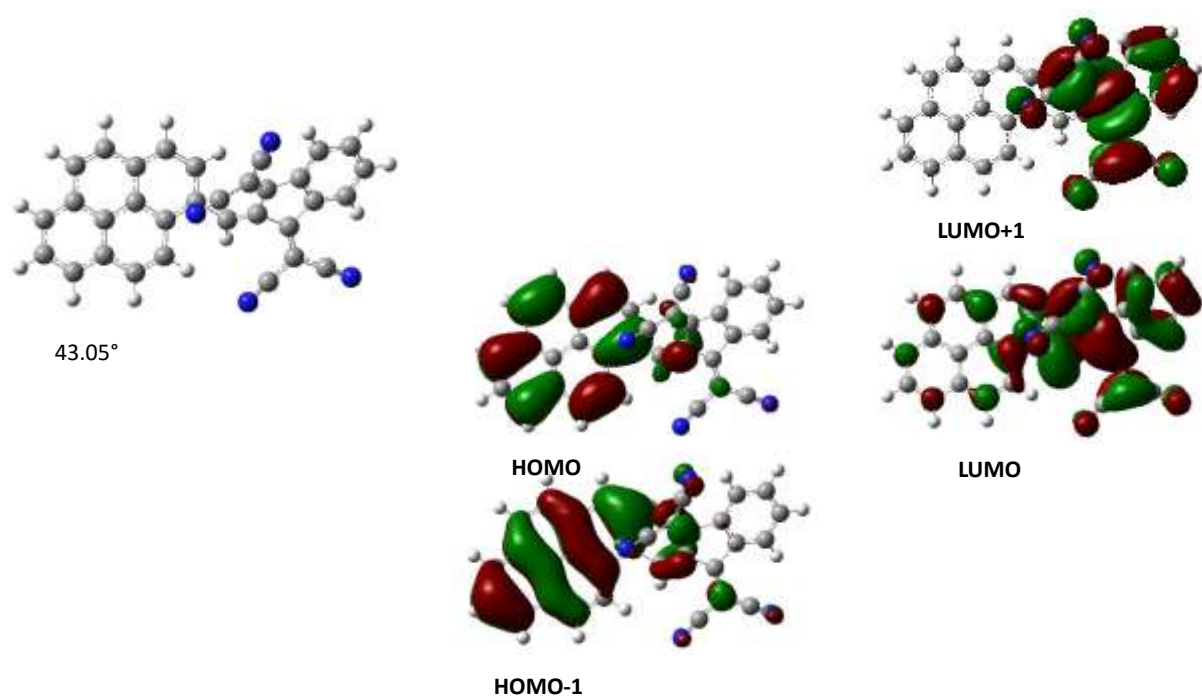

Figure S68. **Dye 6**

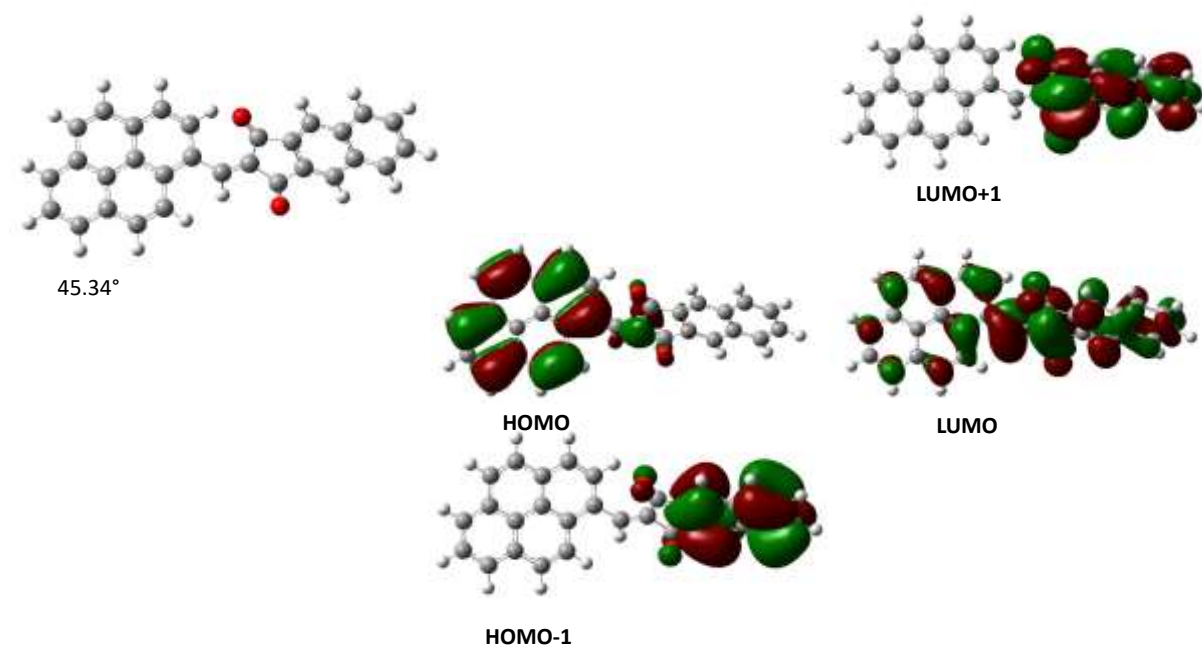

Figure S69. **Dye 7**

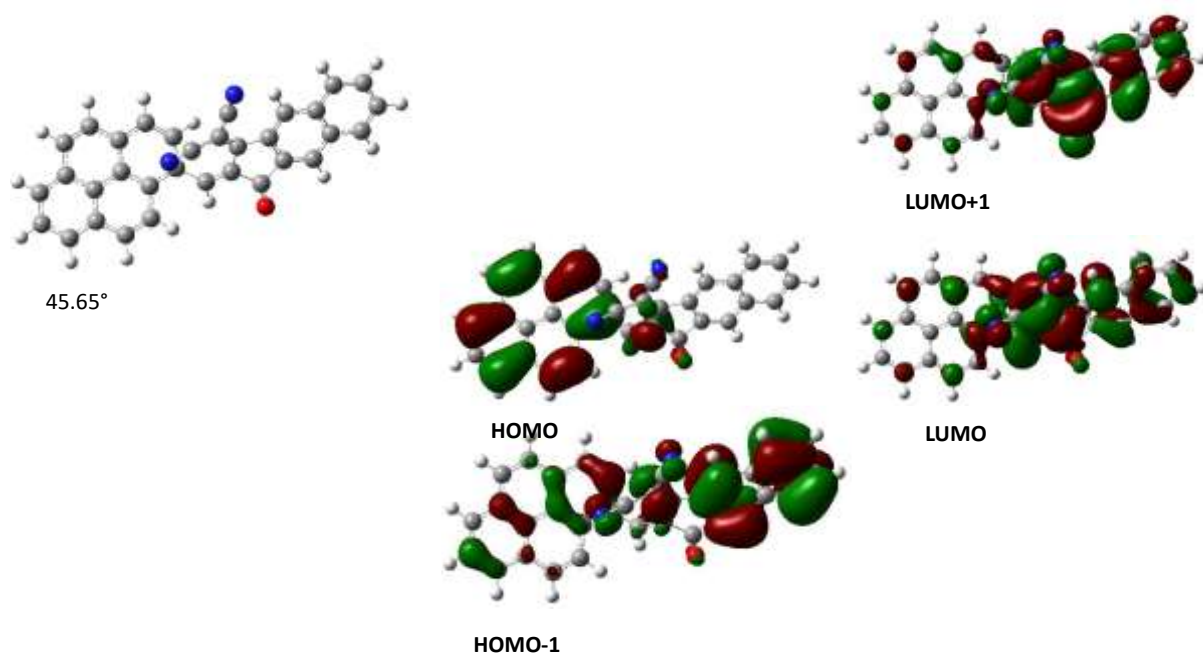

Figure S70. **Dye 8**

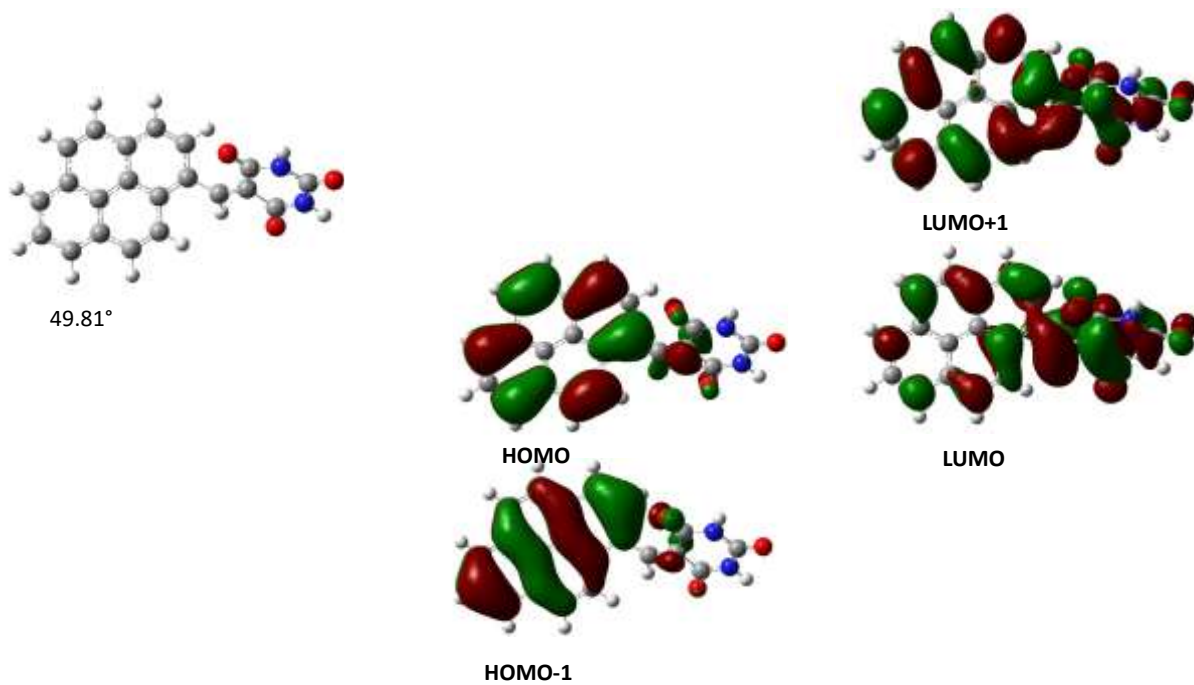



Figure S71. **Dye 9**

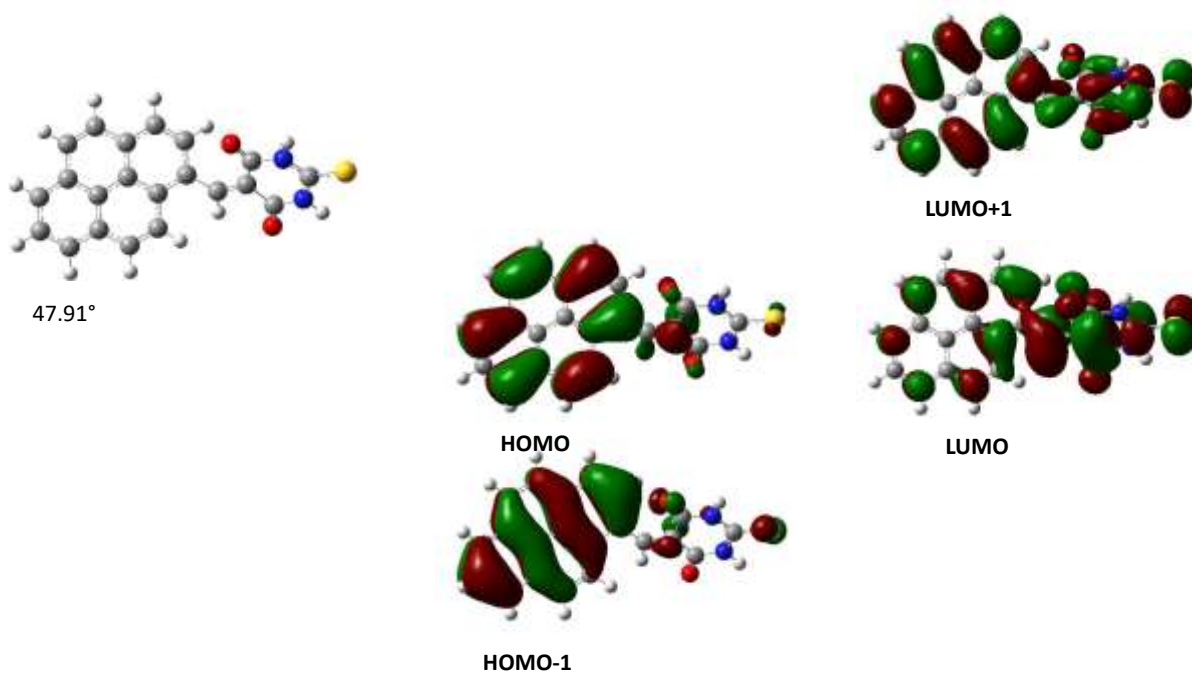

Figure S72. **Dye 10**

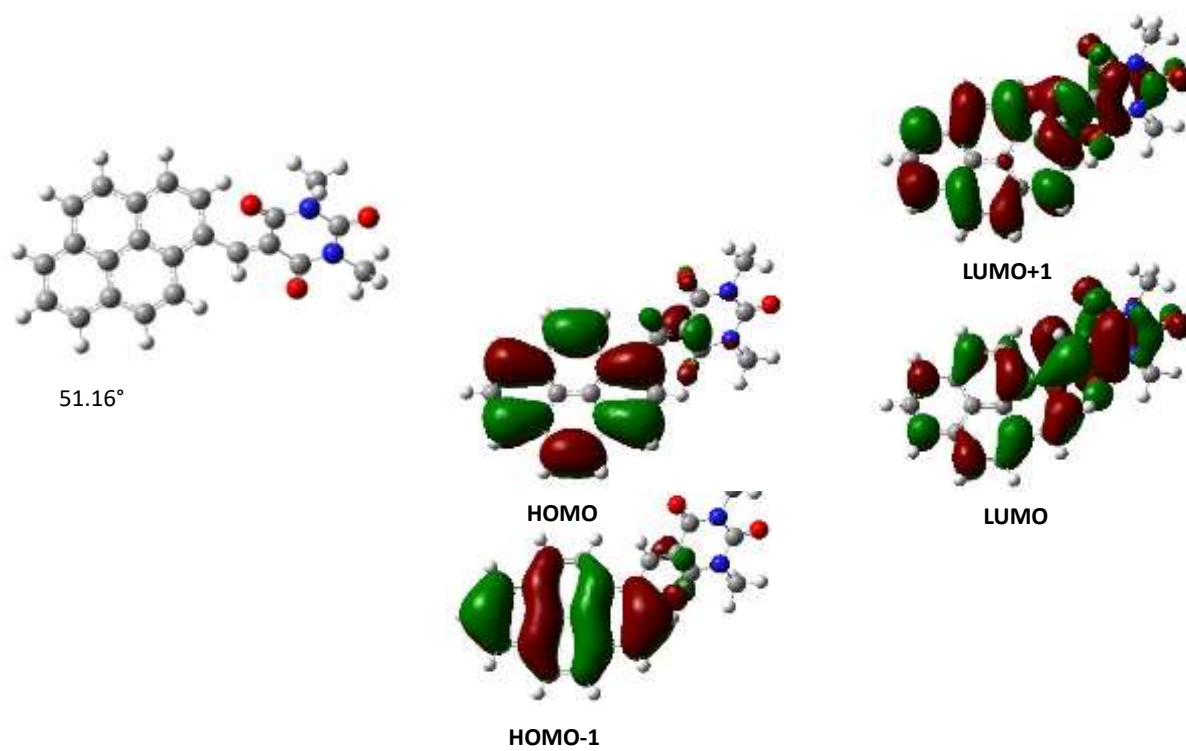

**Figure S73. Dye 11**

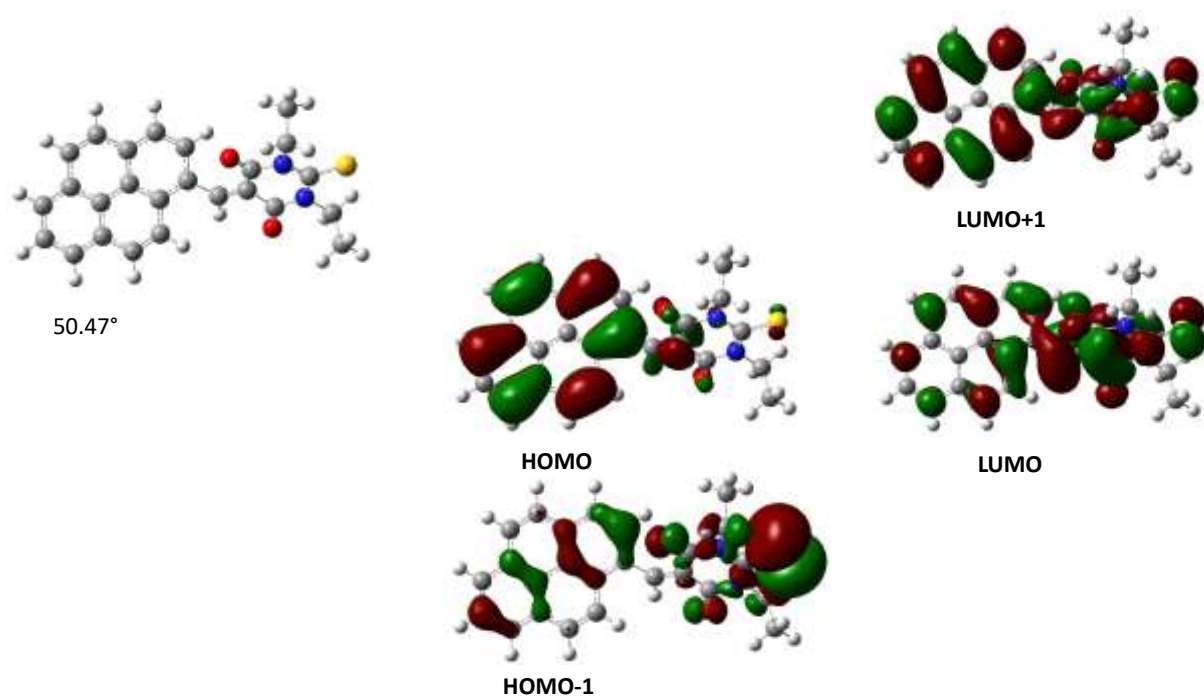

**Figure S74. Dye 12**

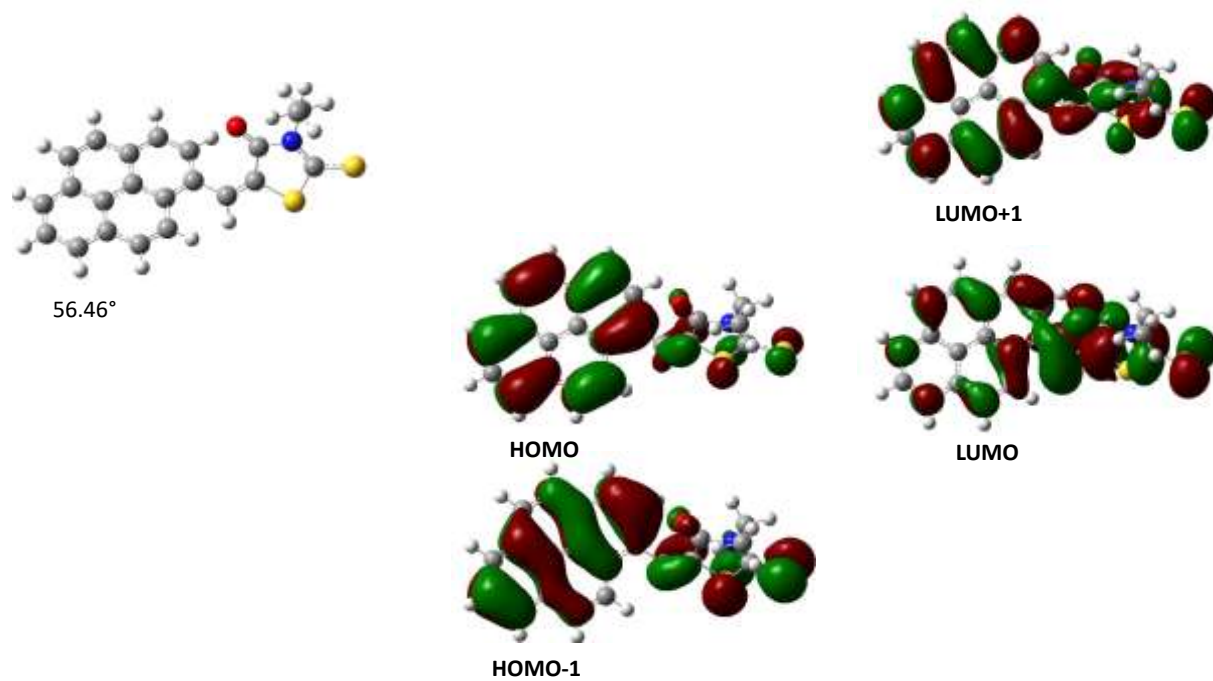

Figure S75. **Dye 13**

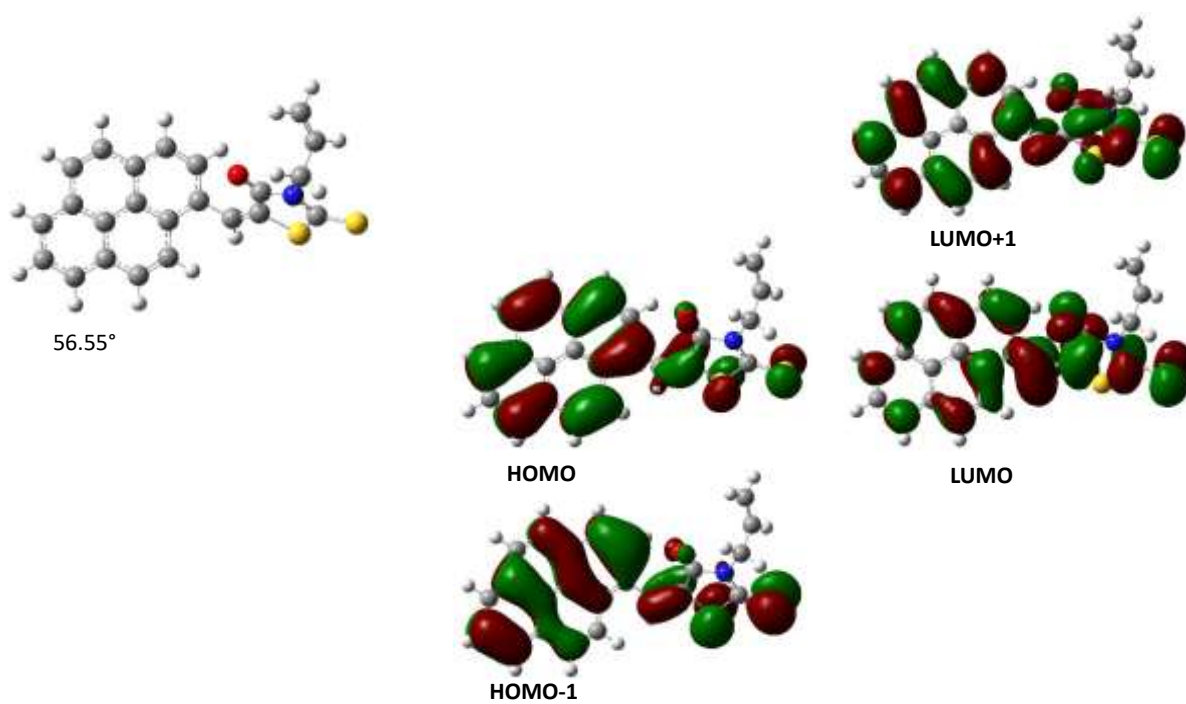

Figure S76. **Dye 14**

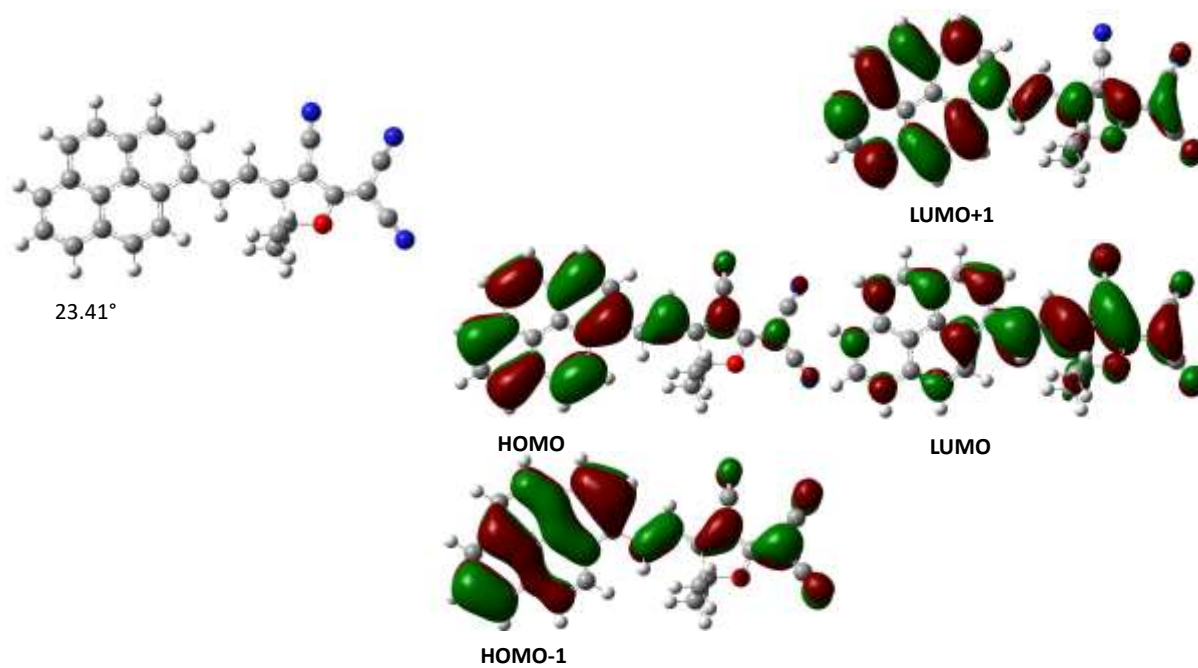

**Figure S77. Dye 15**

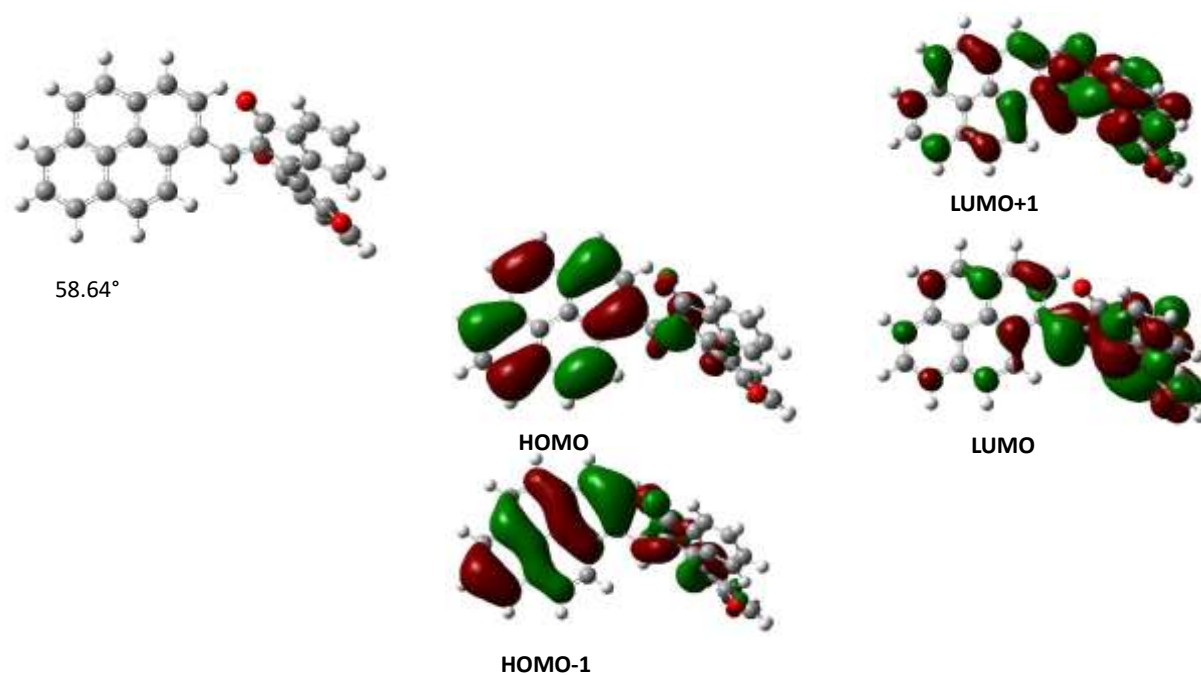

**Table S5. Energy levels of the main orbitals for dyes Dye 1-Dye 15**

|               | HOMO -1 | HOMO   | LUMO   | LUMO +1 |
|---------------|---------|--------|--------|---------|
| <b>Dye 1</b>  | -8.658  | -7.563 | -1.069 | 0.128   |
| <b>Dye 2</b>  | -8.805  | -7.712 | -1.705 | -0.106  |
| <b>Dye 3</b>  | -8.614  | -7.605 | -1.445 | -0.657  |
| <b>Dye 4</b>  | -8.656  | -7.623 | -1.784 | -1.119  |
| <b>Dye 5</b>  | -8.654  | -7.647 | -1.829 | -1.773  |
| <b>Dye 6</b>  | -8.489  | -7.582 | -1.823 | -0.594  |
| <b>Dye 7</b>  | -8.532  | -7.619 | -1.905 | -1.050  |
| <b>Dye 8</b>  | -8.683  | -7.650 | -1.670 | -0.142  |
| <b>Dye 9</b>  | -8.711  | -7.676 | -1.885 | -0.339  |
| <b>Dye 10</b> | -8.609  | -7.616 | -1.318 | -0.114  |
| <b>Dye 11</b> | -8.519  | -7.626 | -1.783 | -0.298  |
| <b>Dye 12</b> | -8.505  | -7.480 | -1.460 | -0.295  |
| <b>Dye 13</b> | -8.519  | -6.197 | -1.260 | -0.288  |
| <b>Dye 14</b> | -8.619  | -7.519 | -2.089 | -0.408  |
| <b>Dye 15</b> | -8.548  | -7.572 | -1.759 | -1.070  |

**Table S6. Main transitions observed for dyes Dye 1-Dye 15**

**Dye 1**

| No. | Wavelength nm) | Osc. Strength | Major contribs |     |
|-----|----------------|---------------|----------------|-----|
| 1   | 352.859359115  | 0.8672        | HOMO->LUMO     | 94% |
| 2   | 317.558059094  | 0.015         | H-1->LUMO      | 47% |
| 3   | 275.098611046  | 0.2322        | H-1->LUMO      | 11% |
| 4   | 260.492883881  | 0.2565        | H-1->LUMO      | 18% |
| 5   | 256.600424298  | 0.0966        | H-2->LUMO      | 51% |
| 6   | 251.448432328  | 0.0696        | H-2->LUMO      | 26% |
| 7   | 240.70861422   | 0.0056        | H-5->LUMO      | 18% |
| 8   | 230.415345039  | 0.0251        | H-3->LUMO      | 47% |
| 9   | 226.919347363  | 0.9841        | H-1->L+1       | 59% |
| 10  | 220.844290291  | 0.2207        | H-6->LUMO      | 10% |

**Dye 2**

| No. | Wavelength nm) | Osc. Strength | Major contribs |     |
|-----|----------------|---------------|----------------|-----|
| 1   | 399.279250973  | 0.9035        | HOMO->LUMO     | 94% |
| 2   | 330.589251846  | 0.0584        | H-1->LUMO      | 69% |
| 3   | 285.099781577  | 0.2251        | HOMO->L+1      | 74% |
| 4   | 274.775482054  | 0.0531        | H-2->LUMO      | 70% |
| 5   | 266.374890992  | 0.1056        | H-2->LUMO      | 11% |
| 6   | 253.38577387   | 0.0658        | H-3->LUMO      | 17% |
| 7   | 240.2515076    | 0.1055        | H-3->LUMO      | 59% |
| 8   | 233.897134418  | 0.4683        | H-1->L+1       | 69% |
| 9   | 222.780789916  | 0.9317        | H-4->LUMO      | 18% |
| 10  | 219.115285261  | 0.0096        | H-4->LUMO      | 19% |

**Dye 3**

| No. | Wavelength nm) | Osc. Strength | Major contribs |     |
|-----|----------------|---------------|----------------|-----|
| 1   | 405.442096181  | 1.0228        | HOMO->LUMO     | 87% |
| 2   | 358.916723634  | 0.0331        | H-3->LUMO      | 15% |
| 3   | 335.491376264  | 0.006         | H-7->LUMO      | 14% |
| 4   | 327.359647812  | 0.0595        | H-1->LUMO      | 46% |
| 5   | 293.648318441  | 0.0653        | HOMO->L+1      | 38% |
| 6   | 290.164040844  | 0.1083        | HOMO->L+1      | 21% |
| 7   | 274.447036064  | 0.1274        | H-3->LUMO      | 19% |
| 8   | 266.598273367  | 0.0224        | H-6->LUMO      | 14% |
| 9   | 265.41689254   | 0.0486        | H-4->LUMO      | 15% |
| 10  | 256.542020344  | 0.0577        | HOMO->L+3      | 13% |

**Dye 4**

| No. | Wavelength nm) | Osc. Strength | Major contribs                   |     |
|-----|----------------|---------------|----------------------------------|-----|
| 1   | 437.658205416  | 0.6231        | HOMO->LUMO                       | 83% |
| 2   | 338.227877383  | 0.0642        | H-1->LUMO (59%), HOMO->L+3 (12%) |     |
| 3   | 333.595740764  | 0.1891        | HOMO->L+1 (58%)                  |     |
| 4   | 326.721284421  | 0.0347        | H-6->L+1 (49%)                   |     |
| 5   | 311.494593403  | 0.4582        | H-2->LUMO (64%)                  |     |
| 6   | 291.617727473  | 0.0765        | H-6->LUMO (17%), HOMO->L+2 (38%) |     |

|    |                        |        |                                                  |
|----|------------------------|--------|--------------------------------------------------|
| 7  | 289.865553064          | 0.2994 | H-3->LUMO (12%), H-2->L (12%), HOMO->L+2 (21%)   |
| 8  | 285.001478087          | 0.018  | H-6->LUMO (15%), H-5->L (26%), H-2->L+1 (20%)    |
| 9  | 284.877057608<br>(14%) | 0.0264 | H-6->L (22%), H-5->L (11%), H-4->L (11%), H->L+3 |
| 10 | 268.259537436          | 0.0335 | H-3->L (40%), H-3->L+1 (11%), H-3->L+2 (12%)     |

#### Dye 5

| No. | Wavelength nm) | Osc. Strength | Major contribs | Minor Contribs |
|-----|----------------|---------------|----------------|----------------|
| 1   | 439.115257702  | 0.6112        | HOMO->LUMO     | 84%            |
| 2   | 373.064310683  | 0.1464        | HOMO->L+1      | 77%            |
| 3   | 340.074038653  | 0.0526        | H-1->LUMO      | 65%            |
| 4   | 324.396109399  | 0.6142        | H-2->L+1       | 65%            |
| 5   | 314.38545785   | 0.2221        | H-2->LUMO      | 65%            |
| 6   | 305.11675406   | 0.2218        | H-4->L+1       | 11%            |
| 7   | 295.665076101  | 0.0392        | H-5->L+1       | 11%            |
| 8   | 288.107526635  | 0.1383        | H-4->L+1       | 36%            |
| 9   | 280.070010645  | 0.1695        | H-1->L+1       | 14%            |
| 10  | 272.283283216  | 0.0717        | H-4->LUMO      | 69%            |

#### Dye 6

| No. | Wavelength nm) | Osc. Strength | Major contribs |     |
|-----|----------------|---------------|----------------|-----|
| 1   | 418.243803172  | 1.1726        | HOMO->LUMO     | 84% |
| 2   | 370.378470537  | 0.0364        | H-4->LUMO      | 58% |
| 3   | 336.995985464  | 0.0173        | H-7->LUMO      | 17% |
| 4   | 327.351004653  | 0.0822        | H-7->LUMO      | 14% |
| 5   | 325.571642803  | 0.0179        | H-1->LUMO      | 79% |
| 6   | 306.883970724  | 0.0265        | H-3->LUMO      | 23% |
| 7   | 293.544032512  | 0.177         | HOMO->L+2      | 54% |
| 8   | 278.873103336  | 0.1554        | H-3->L+1       | 11% |
| 9   | 277.624203435  | 0.1417        | H-5->LUMO      | 13% |
| 10  | 266.988658022  | 0.0452        | H-5->LUMO      | 32% |

#### Dye 7

| No. | Wavelength nm) | Osc. Strength | Major contribs |     |
|-----|----------------|---------------|----------------|-----|
| 1   | 450.017033909  | 0.7104        | HOMO->LUMO     | 84% |
| 2   | 357.777436983  | 0.2288        | H-1->LUMO      | 83% |
| 3   | 339.738568017  | 0.0291        | H-2->LUMO      | 62% |
| 4   | 333.28188224   | 0.018         | H-6->LUMO      | 18% |
| 5   | 326.669634326  | 0.2569        | H-3->LUMO      | 13% |
| 6   | 319.119203676  | 0.2504        | H-3->LUMO      | 26% |
| 7   | 302.385720239  | 0.2817        | H-4->LUMO      | 10% |
| 8   | 293.627455328  | 0.4408        | H-3->LUMO      | 12% |
| 9   | 289.845223986  | 0.2945        | HOMO->L+2      | 23% |
| 10  | 282.147766453  | 0.1214        | H-6->LUMO      | 20% |

#### Dye 8

| No. | Wavelength nm) | Osc. Strength | Major contribs |     |
|-----|----------------|---------------|----------------|-----|
| 1   | 408.730114763  | 0.8157        | HOMO->LUMO     | 91% |

|    |               |        |           |     |
|----|---------------|--------|-----------|-----|
| 2  | 335.400619521 | 0.0413 | H-1->LUMO | 70% |
| 3  | 299.449794735 | 0.0756 | H-4->LUMO | 36% |
| 4  | 288.617237796 | 0.1115 | H-4->LUMO | 27% |
| 5  | 275.593920628 | 0.0843 | H-2->LUMO | 31% |
| 6  | 266.707236458 | 0.0573 | H-2->LUMO | 39% |
| 7  | 256.733259504 | 0.0514 | HOMO->L+2 | 11% |
| 8  | 251.775227464 | 0.1434 | H-8->LUMO | 38% |
| 9  | 241.807140095 | 0.1439 | H-3->LUMO | 55% |
| 10 | 236.909452769 | 0.3655 | H-1->L+1  | 62% |

#### Dye 9

| No. | Wavelength nm) | Osc. Strength | Major contribs |     |
|-----|----------------|---------------|----------------|-----|
| 1   | 397.984762341  | 0.8086        | HOMO->LUMO     | 90% |
| 2   | 329.789049108  | 0.0271        | H-1->LUMO      | 64% |
| 3   | 300.560454322  | 0.0896        | H-4->LUMO      | 36% |
| 4   | 290.069000801  | 0.1111        | H-4->LUMO      | 26% |
| 5   | 273.502587603  | 0.1019        | H-2->LUMO      | 17% |
| 6   | 264.003988272  | 0.0361        | H-2->LUMO      | 44% |
| 7   | 257.709817111  | 0.2031        | H-8->LUMO      | 22% |
| 8   | 256.144519073  | 0.047         | H-2->LUMO      | 11% |
| 9   | 249.319698792  | 0.0416        | H-8->LUMO      | 21% |
| 10  | 240.256163186  | 0.1505        | H-3->LUMO      | 35% |

#### Dye 10

| No. | Wavelength nm) | Osc. Strength | Major contribs |     |
|-----|----------------|---------------|----------------|-----|
| 1   | 422.995438614  | 0.9267        | HOMO->LUMO     | 88% |
| 2   | 382.56099544   | 0.0108        | H-1->LUMO      | 57% |
| 3   | 337.748761917  | 0.0418        | H-2->LUMO      | 59% |
| 4   | 302.858451835  | 0.0644        | H-7->LUMO      | 21% |
| 5   | 291.528587581  | 0.0977        | H-7->LUMO      | 31% |
| 6   | 286.609013182  | 0.531         | H-3->LUMO      | 69% |
| 7   | 279.067689323  | 0.0573        | H-4->LUMO      | 20% |
| 8   | 270.495228668  | 0.0272        | H-6->LUMO      | 58% |
| 9   | 267.334065747  | 0.0384        | H-4->LUMO      | 40% |
| 10  | 263.431834723  | 0.1389        | H-9->LUMO      | 35% |

#### Dye 11

| No. | Wavelength nm) | Osc. Strength | Major contribs |      |
|-----|----------------|---------------|----------------|------|
| 1   | 422.995438614  | 0.9267        | HOMO->LUMO     | 88%  |
| 2   | 382.56099544   | 0.0108        | H-1->LUMO      | 57%  |
| 3   | 337.748761917  | 0.0418        | H-2->LUMO      | 59%  |
| 4   | 302.858451835  | 0.0644        | H-7->LUMO      | 21%  |
| 5   | 291.528587581  | 0.0977        | H-7->LUMO      | 31%  |
| 6   | 286.609013182  | 0.531         | H-3->LUMO      | (69% |
| 7   | 279.067689323  | 0.0573        | H-4->LUMO      | 20%  |
| 8   | 270.495228668  | 0.0272        | H-6->LUMO      | 58%  |
| 9   | 267.334065747  | 0.0384        | H-4->LUMO      | 40%  |
| 10  | 263.431834723  | 0.1389        | H-9->LUMO      | 35%  |

**Dye 12**

| No. | Wavelength (nm) | Osc. Strength | Major contribs |     |
|-----|-----------------|---------------|----------------|-----|
| 1   | 392.777650042   | 1.0089        | HOMO->LUMO     | 82% |
| 2   | 369.14339778    | 0.0213        | H-3->LUMO      | 39% |
| 3   | 324.787009515   | 0.0344        | H-1->LUMO      | 52% |
| 4   | 309.210646712   | 0.1023        | H-2->LUMO      | 23% |
| 5   | 290.225170909   | 0.2638        | H-7->LUMO      | 15% |
| 6   | 279.5837122     | 0.0007        | H-7->LUMO      | 23% |
| 7   | 264.285364424   | 0.1726        | H-7->LUMO      | 12% |
| 8   | 261.99009596    | 0.1807        | H-5->LUMO      | 14% |
| 9   | 261.487278313   | 0.2322        | HOMO->L+2      | 22% |
| 10  | 253.261552471   | 0.0134        | H-4->LUMO      | 32% |

**Dye 13**

| No. | Wavelength (nm) | Osc. Strength | Major contribs                                   |  |
|-----|-----------------|---------------|--------------------------------------------------|--|
| 1   | 393.213640583   | 1.0117        | HOMO->LUMO (82%)                                 |  |
| 2   | 368.594681488   | 0.0217        | H-3->LUMO (40%), H-3->L+1 (16%), H-2->LUMO (17%) |  |
| 3   | 324.940226995   | 0.0363        | H-1->LUMO (53%), HOMO->L+2 (23%)                 |  |
| 4   | 308.817856462   | 0.1082        | H-2->LUMO (23%), HOMO->L+1 (41%)                 |  |
| 5   | 290.469948956   | 0.2359        | H-8->LUMO (12%), HOMO->L+1 (24%)                 |  |
| 6   | 279.356930765   | 0.0077        | H-8->LUMO (20%), HOMO->L+1 (15%)                 |  |
| 7   | 265.553327362   | 0.1131        | H-6->LUMO (14%), H-5->LUMO (26%)                 |  |
| 8   | 261.779893189   | 0.0067        | H-4->LUMO (16%), H-4->L+1 (12%), HOMO->L+4 (58%) |  |
| 9   | 260.460050024   | 0.4683        | H-5->LUMO (27%), HOMO->L+2 (25%)                 |  |
| 10  | 253.344353199   | 0.0073        | H-4->LUMO (30%), HOMO->L+4 (26%)                 |  |

**Dye 14**

| No. | Wavelength (nm) | Osc. Strength | Major contribs |     |
|-----|-----------------|---------------|----------------|-----|
| 1   | 450.73687793    | 1.6471        | HOMO->LUMO     | 88% |
| 2   | 339.041792262   | 0.1143        | H-1->LUMO      | 65% |
| 3   | 313.43173904    | 0.1466        | H-2->LUMO      | 51% |
| 4   | 291.04953875    | 0.2683        | H-2->LUMO      | 22% |
| 5   | 278.472234603   | 0.0695        | H-3->LUMO      | 32% |
| 6   | 270.436227833   | 0.0594        | H-3->LUMO      | 38% |
| 7   | 262.161827358   | 0.0525        | H-4->LUMO      | 33% |
| 8   | 252.261883278   | 0.0317        | H-4->LUMO      | 33% |
| 9   | 239.587611378   | 0.2244        | H-1->L+1       | 53% |
| 10  | 233.452320722   | 0.3           | H-2->L+1       | 12% |

**Dye 15**

| No. | Wavelength (nm) | Osc. Strength | Major contribs |     |
|-----|-----------------|---------------|----------------|-----|
| 1   | 443.212243556   | 0.7973        | H-2->LUMO      | 10% |
| 2   | 385.750888312   | 0.2691        | H-4->LUMO      | 10% |
| 3   | 355.898019382   | 0.0026        | H-8->L+1       | 13% |
| 4   | 347.246024401   | 0.0211        | H-4->L+2       | 11% |



|    |               |        |           |     |
|----|---------------|--------|-----------|-----|
| 5  | 336.867797887 | 0.2331 | H-1->LUMO | 32% |
| 6  | 330.413050347 | 0.3542 | H-3->LUMO | 21% |
| 7  | 323.254316288 | 0.2028 | H-2->LUMO | 11% |
| 8  | 299.457027298 | 0.0508 | H-8->LUMO | 18% |
| 9  | 295.968568457 | 0.0404 | H-2->L+2  | 32% |
| 10 | 291.398404184 | 0.0202 | H-6->LUMO | 19% |

## TGA thermograms of the different dyes

Figure S78. Dye 1

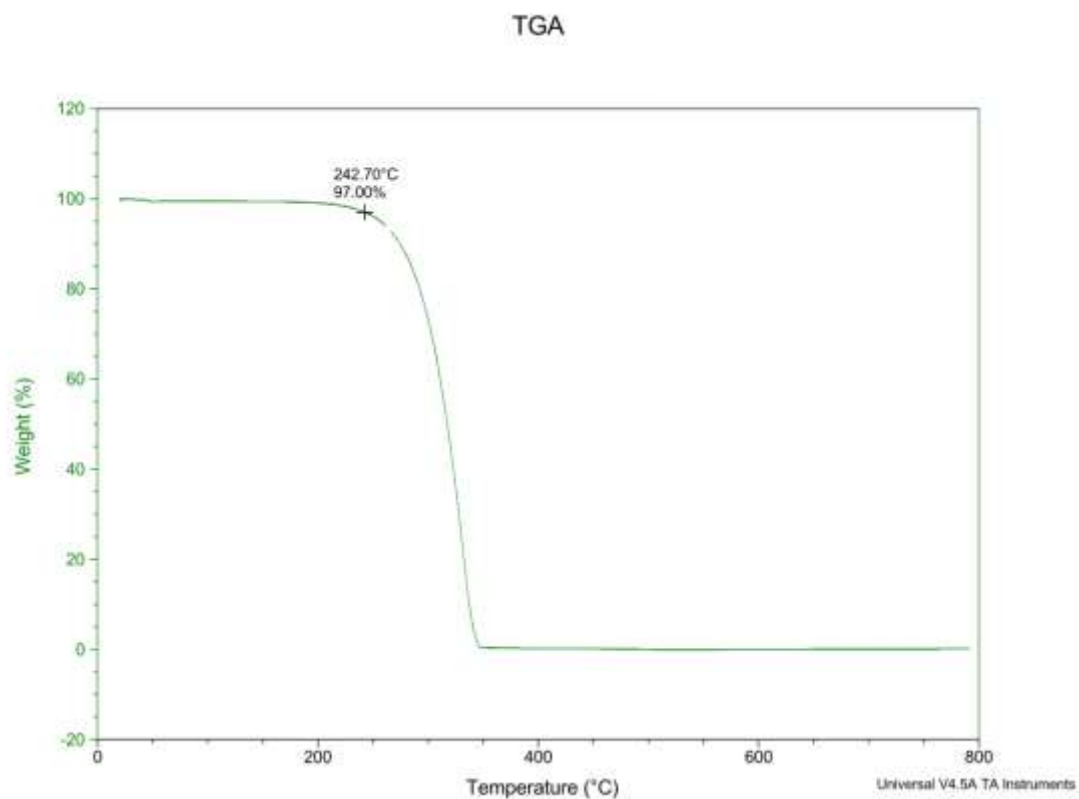

Figure S79. Dye 2

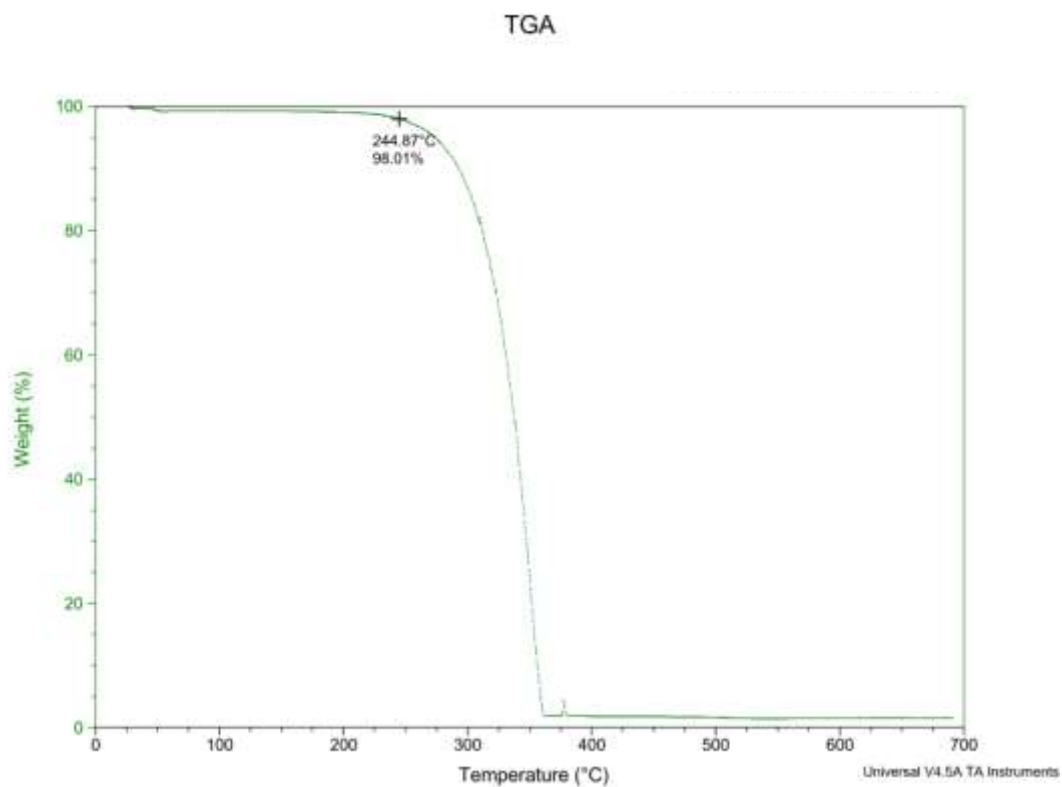

Figure S80. Dye 3

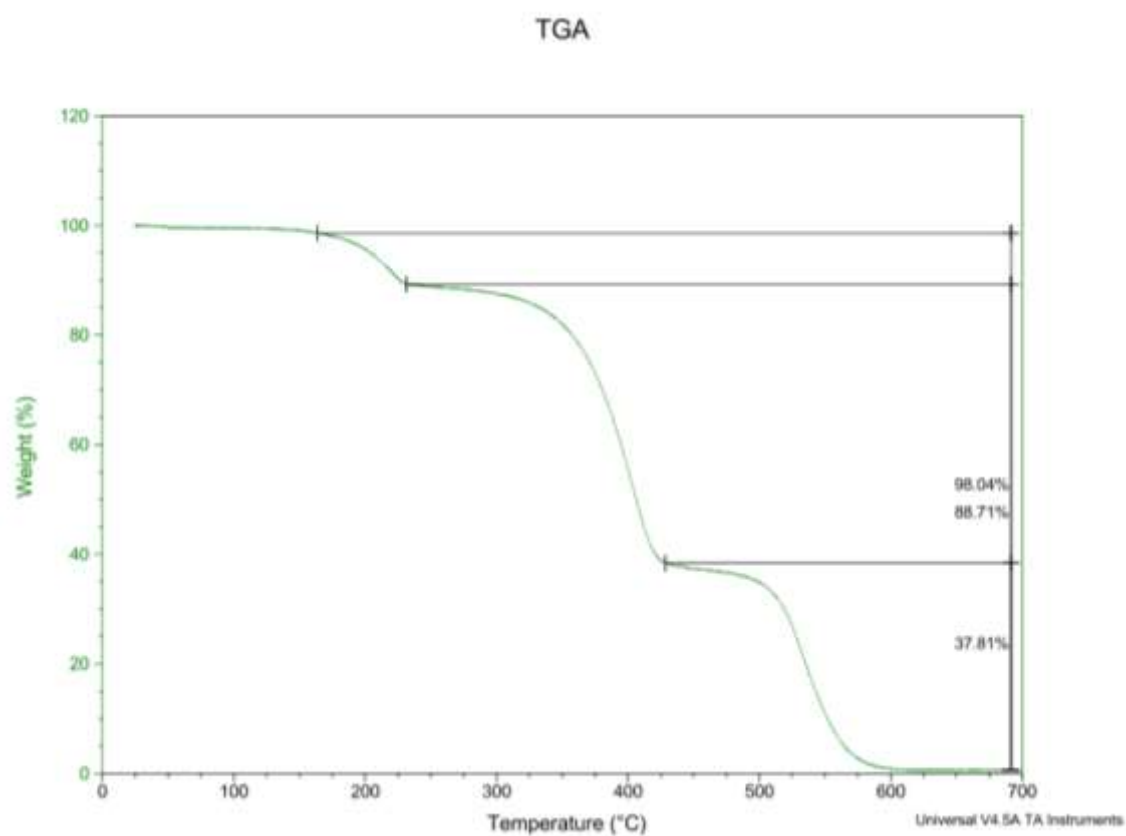

Figure S81. Dye 4

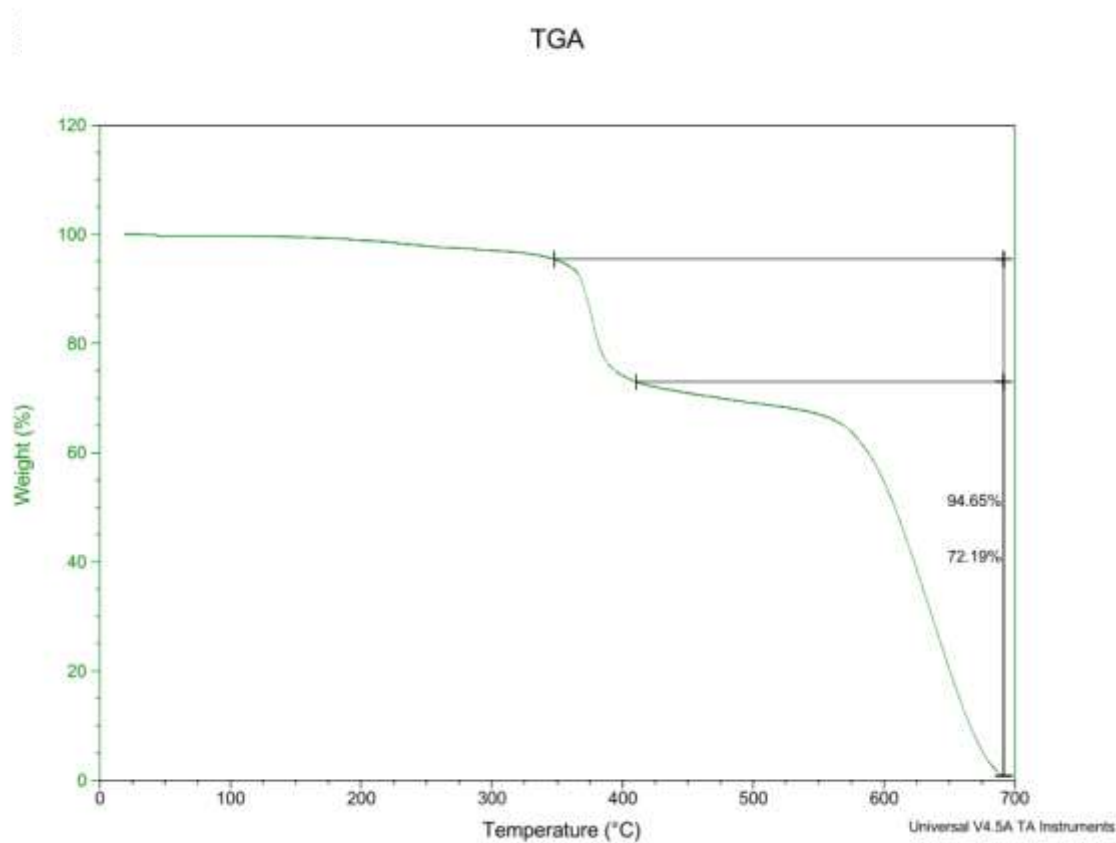

Figure S82. Dye 5

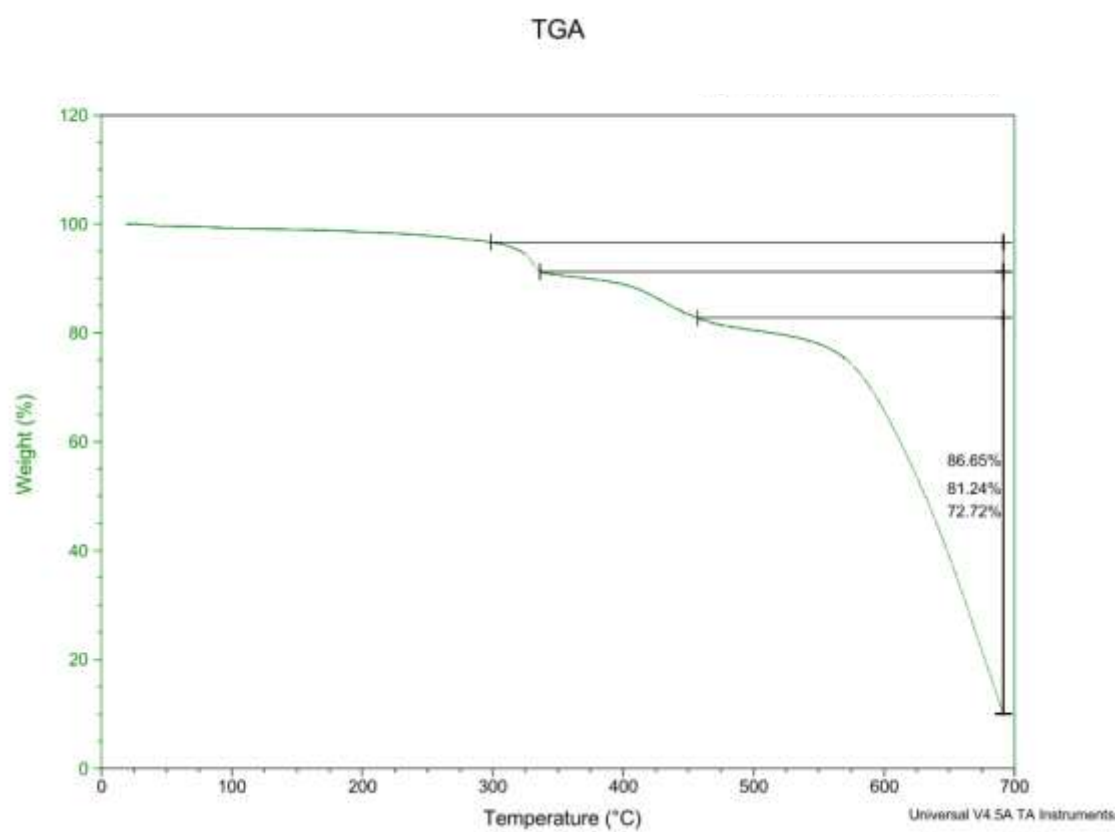

Figure S83. Dye 6

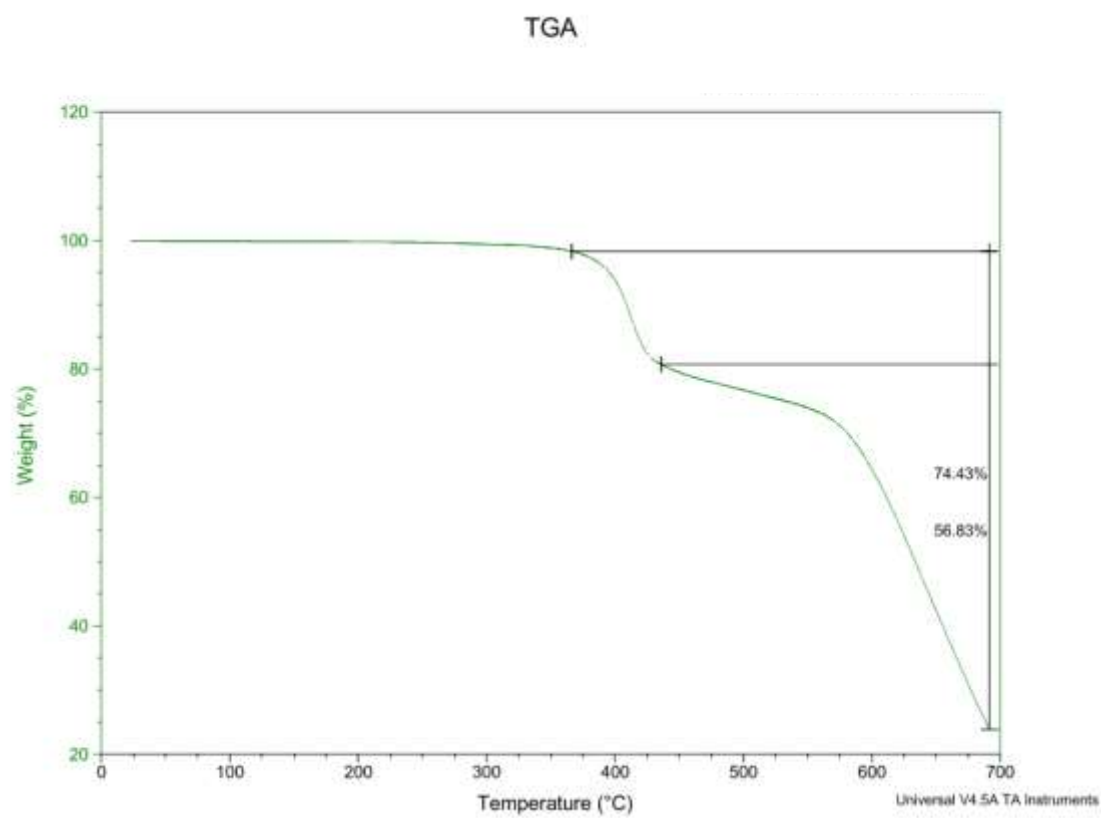

Figure S84. Dye 7

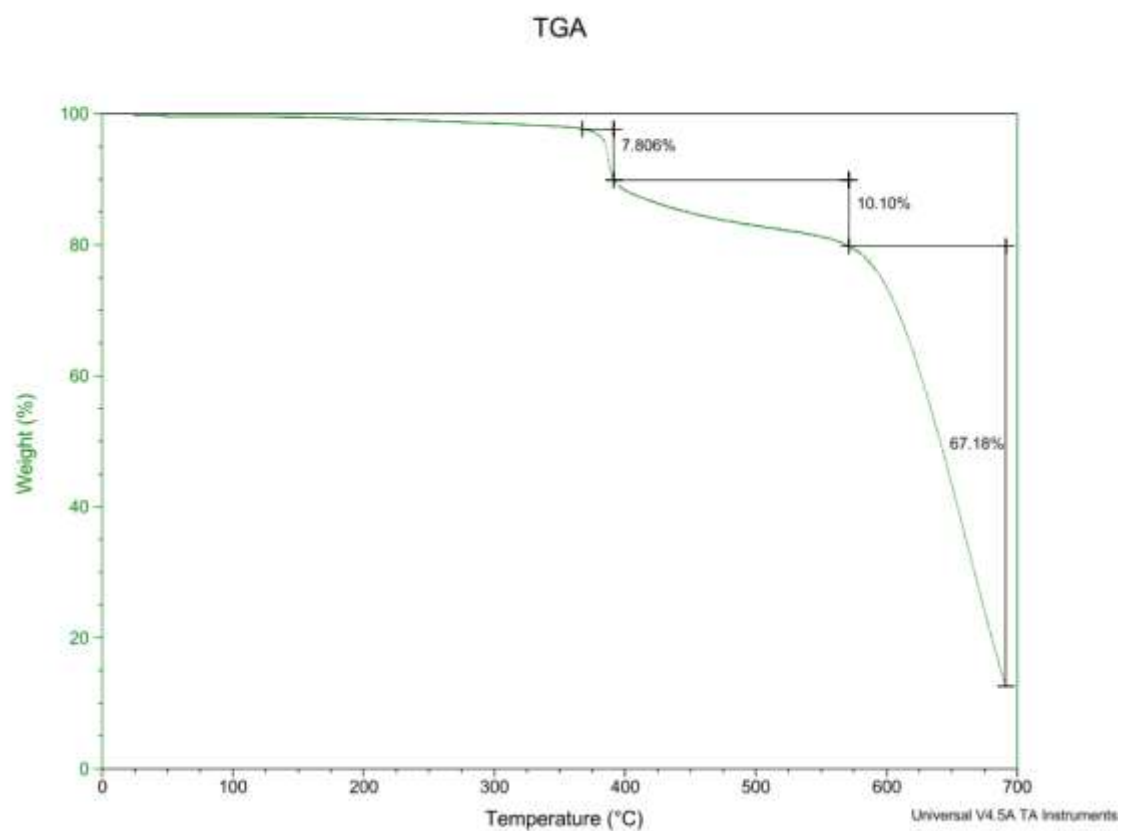

Figure S85. Dye 8

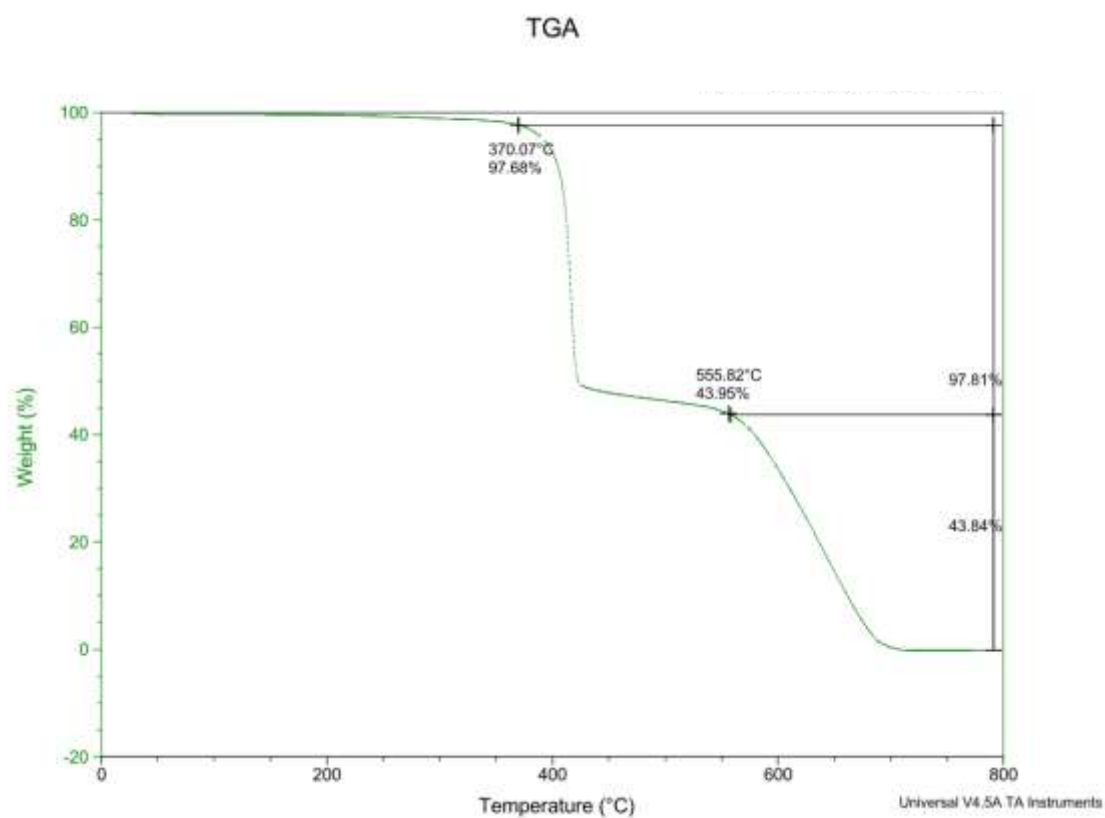

Figure S86. Dye 9

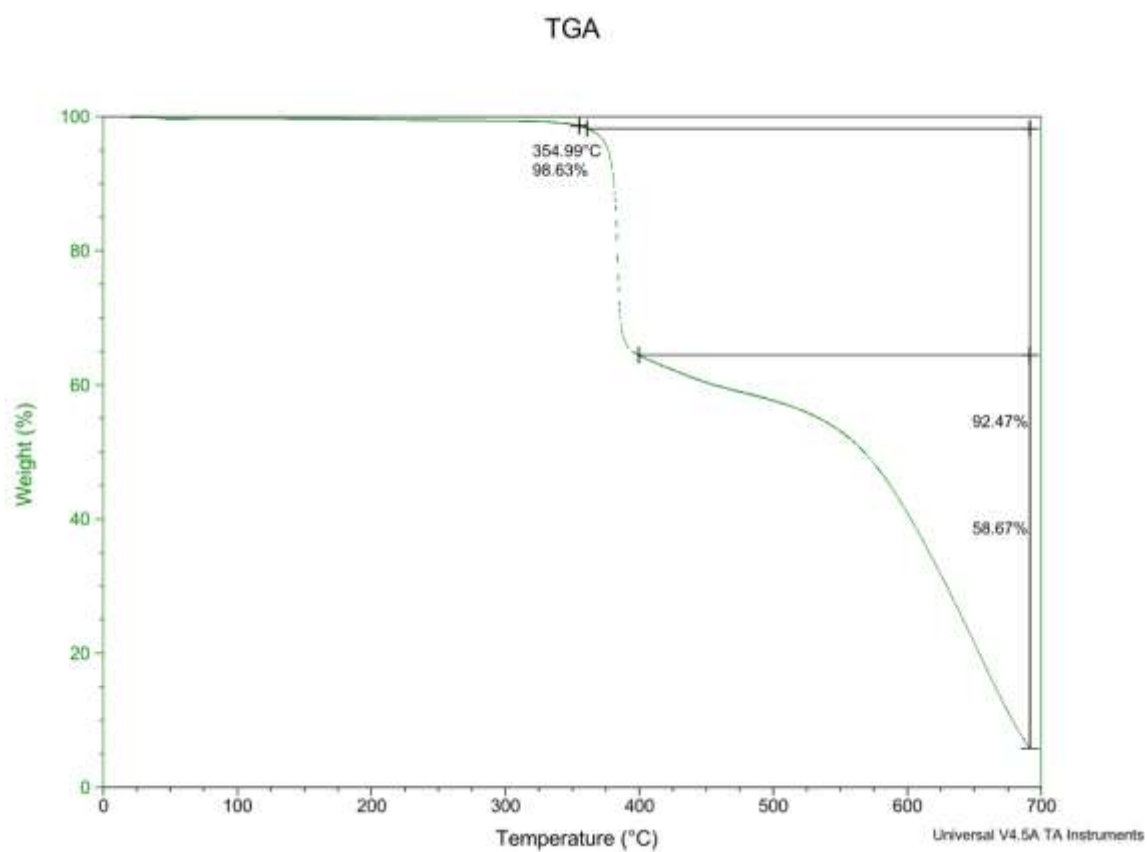

Figure S87. Dye 10

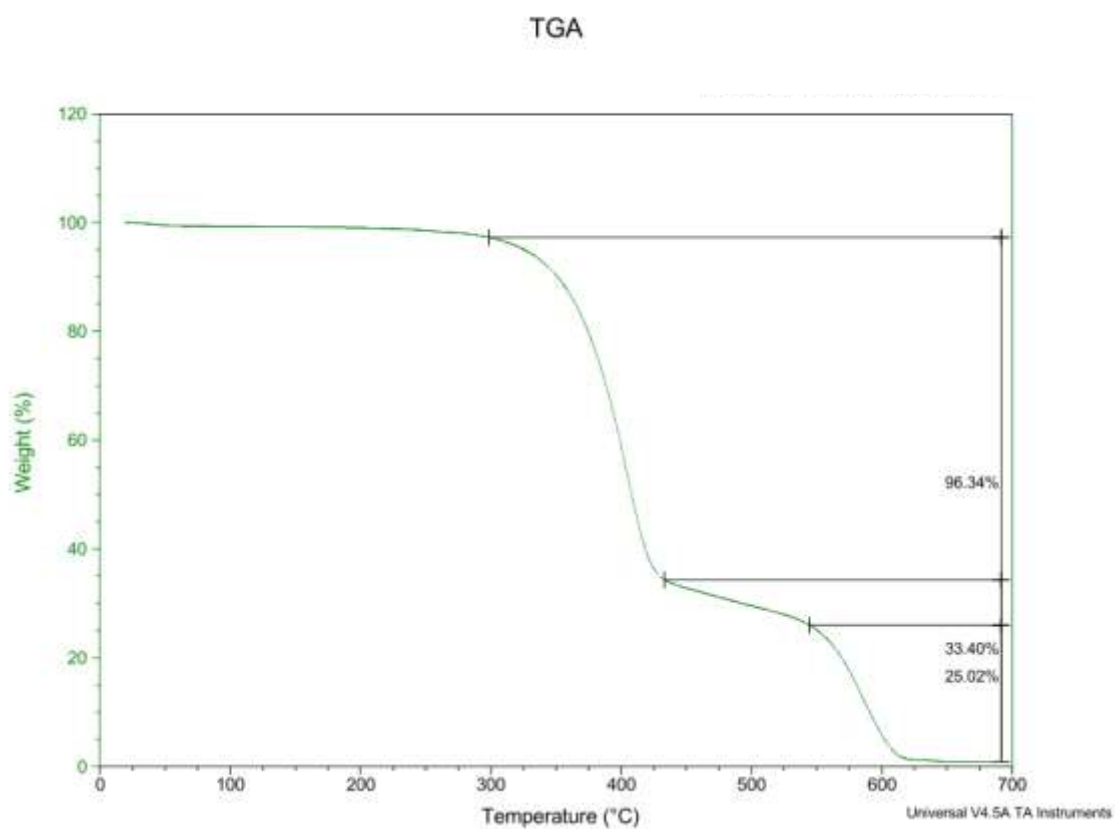

**Figure S88. Dye 11**

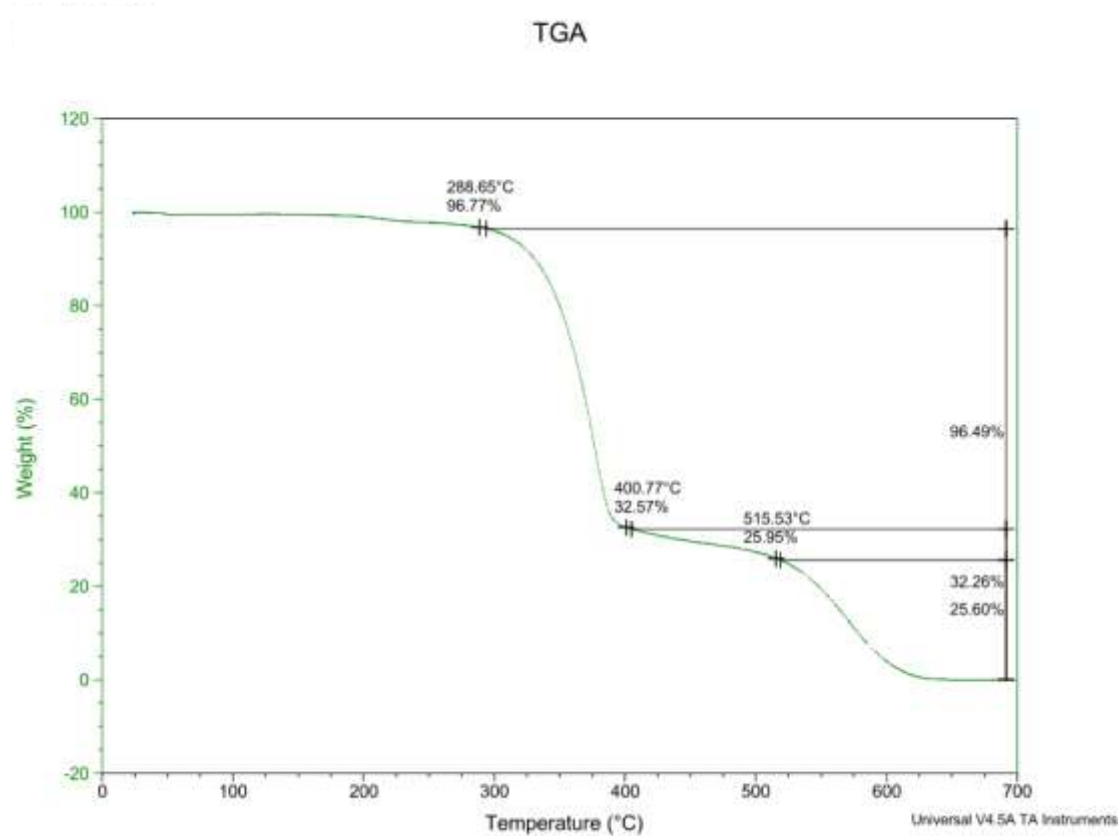

**Figure S89. Dye 12**

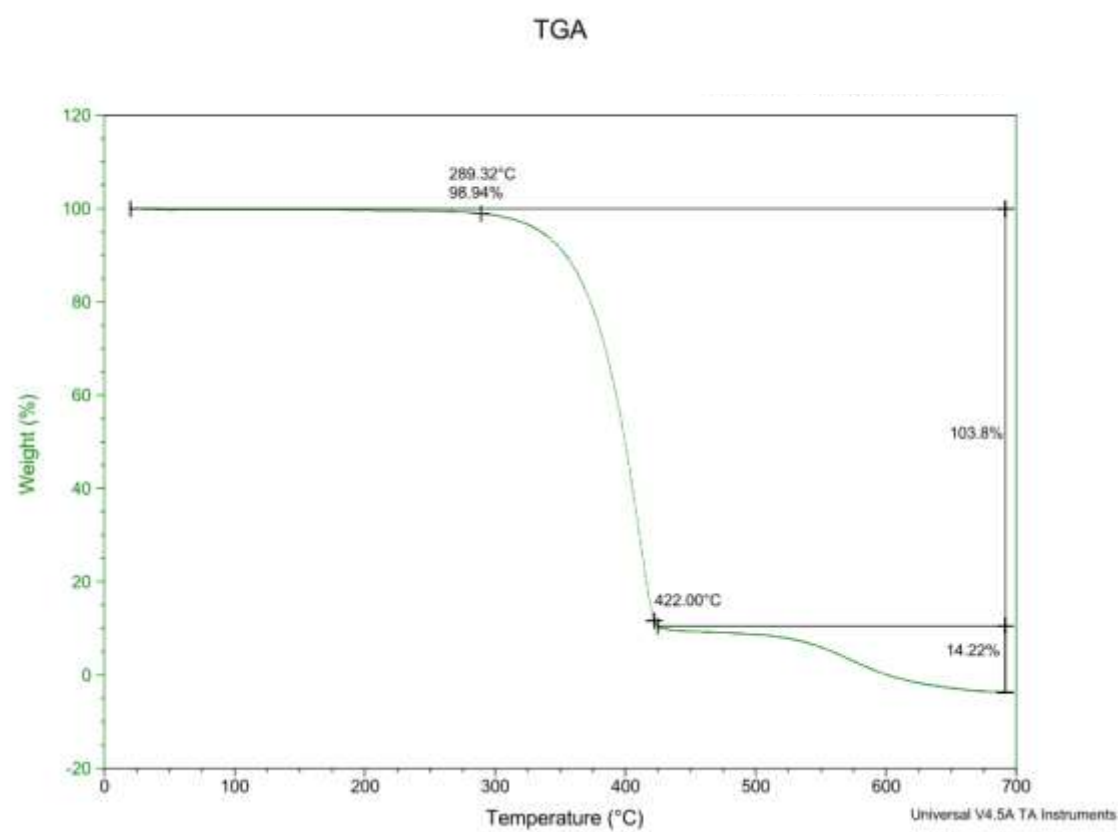

Figure S90. Dye 13

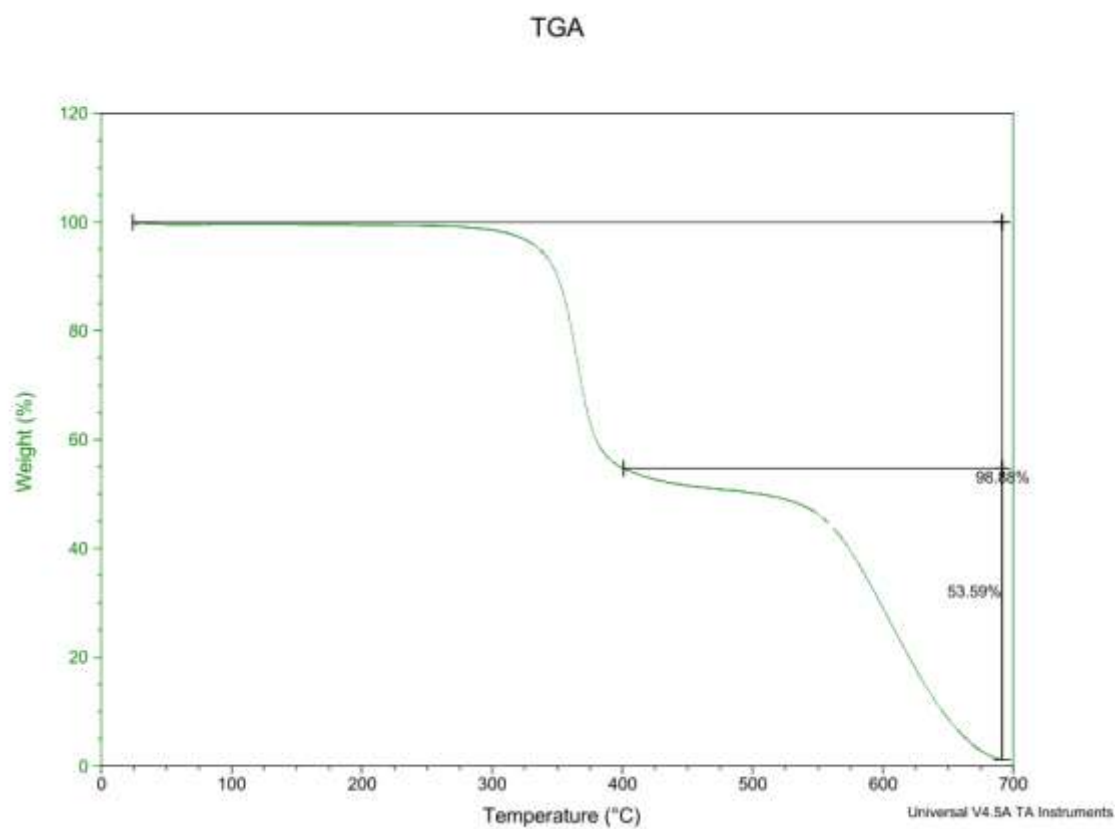

Figure S91. Dye 14

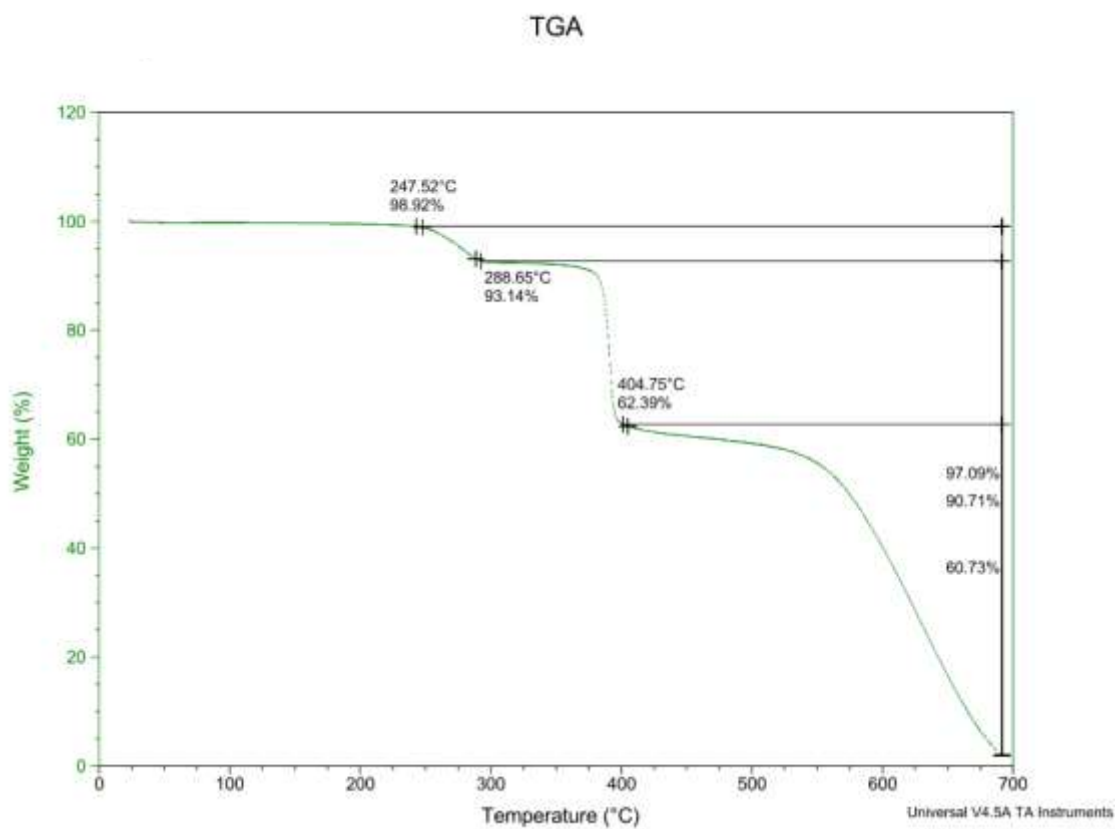



Figure S92. Dye 15

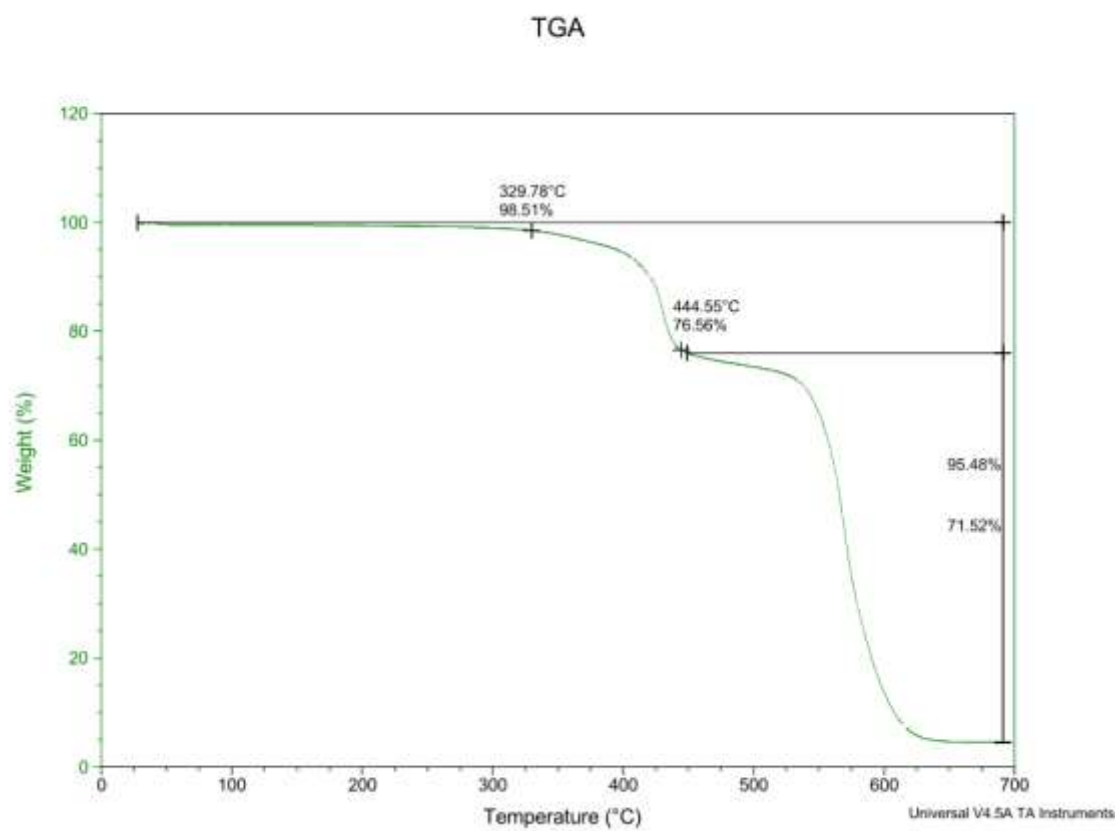

Supplement: s1 [file s1]
